# Supplementary material for: Integrative proteomic and glycoproteomic profiling of Mycobacterium tuberculosis culture filtrate
Source: PubMed Central journal article supplement (PMC7053730; doi:10.1371/journal.pone.0221837), 2020-03-03

# MazF7 (Rv2063A) Possible toxin MazF7

Spec FDR: 0/0 = NaN% Pep FDR: 0/0 = NaN% Prot FDR: 0/0 = NaN% # Prot (Max Parsimony): 1635 Unique Prot: 1634 Unlabeled Decoys: 0/0

View mode:  Proteins  Proteins Max Pars  Peptides  Scans

| Locus | Group  | GroupType | Length | #UniquePeptides | MolWt | SequenceCount | SpectrumCount | NSAF | Coverage             | Protein Score | Description |                                                                                                              |
|-------|--------|-----------|--------|-----------------|-------|---------------|---------------|------|----------------------|---------------|-------------|--------------------------------------------------------------------------------------------------------------|
| 1     | POCL62 | 958       | Unique | 136             | 6     | 14208.7       | 6             | 9    | 0.000572660478457528 | 0.7426        | 26.2139     | Probable endoribonuclease MazF7 OS=Mycobacterium tuberculosis (strain ATCC 25618 / H37Rv) GN=mazF7 PE=1 SV=1 |

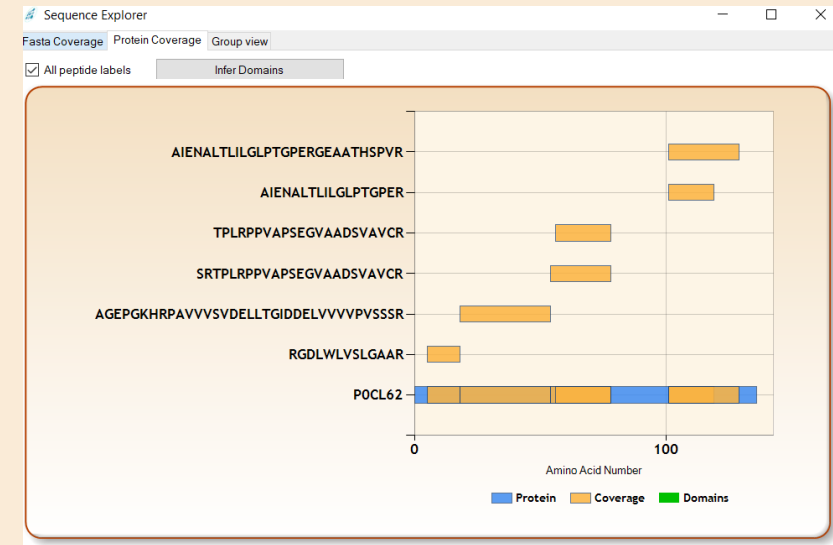

| File Name               | Scan No | Z | Unique | MeasuredMH  | TheoreticalMH | PPM      | PrimaryScore | SecondaryScore   | DeltaCN | PeaksMatched | BayesianScore | PeptideSequence                          |
|-------------------------|---------|---|--------|-------------|---------------|----------|--------------|------------------|---------|--------------|---------------|------------------------------------------|
| 171213_PT_H37Rv_1-5.sqt | 13269   | 3 | True   | 2250.169346 | 2249.170674   | -2.07895 | 3.4005       | 10.5847061622308 | 0.5406  | 25           | 0.53012       | R.TPLRPPVAPSEGVAADSVAVCR.G               |
| 171213_PT_H37Rv_1-5.sqt | 23449   | 4 | True   | 2884.563864 | 2883.568682   | -2.83162 | 3.1984       | 8.36447210439857 | 0.5229  | 33           | 0.51318       | R.AIENALTILGLPTGPERGEAATHSPVR.W          |
| 171213_PT_H37Rv_1-5.sqt | 20081   | 2 | True   | 1413.797537 | 1413.796109   | 1.01005  | 3.4682       | 7.93777477618463 | 0.4941  | 19           | 0.50783       | R.RGDLWLVSLGAAR.A                        |
| 171213_PT_H37Rv_1-5.sqt | 27111   | 3 | True   | 1878.06699  | 1878.06949    | -1.33116 | 3.1224       | 7.56360667479839 | 0.4876  | 24           | 0.49616       | R.AIENALTILGLPTGPER.G                    |
| 171213_PT_H37Rv_1-5.sqt | 20067   | 3 | True   | 1413.793899 | 1413.796109   | -1.56317 | 2.9076       | 6.08797544748883 | 0.4237  | 22           | 0.45541       | R.RGDLWLVSLGAAR.A                        |
| 171213_PT_H37Rv_1-5.sqt | 26207   | 4 | True   | 3726.988669 | 3726.007231   | -5.87928 | 2.6753       | 5.17787121347217 | 0.4821  | 25           | 0.45319       | R.AGEPGKHRPAVVVSVDELDTGIDDELVVVVPVSSSR.S |
| 171213_PT_H37Rv_1-5.sqt | 11824   | 4 | True   | 2492.295193 | 2492.303813   | -3.45866 | 3.1656       | 4.45675018086982 | 0.3782  | 39           | 0.41881       | R.SRTPLRPPVAPSEGVAADSVAVCR.G             |
| 171213_PT_H37Rv_1-5.sqt | 23502   | 3 | True   | 2884.564427 | 2883.568682   | -2.63645 | 1.9313       | 1.78379129957888 | 0.3476  | 18           | 0.39683       | R.AIENALTILGLPTGPERGEAATHSPVR.W          |
| 171213_PT_H37Rv_1-5.sqt | 27125   | 2 | True   | 1878.061626 | 1878.06949    | -4.1873  | 2.3446       | 4.21990778519745 | 0.3623  | 17           | 0.39378       | R.AIENALTILGLPTGPER.G                    |

>Mycobacterium tuberculosis H37Rv|Rv2063A|mazF7  
 LAEPR**RGDLWLVSLGAAR**AGEPGKHRPAVVVSVDELDTGIDDELVVVVPVSSSRSRTPLRPPVAPSEGVAADSVAVCRGVRVARARLVERLGALKPATMR**AIENALTILGLPTGPER**GEAATHSPVRWTGGRDP

In bold and red: Peptide spectra shown in next slides

# MazF7 (Rv2063A) Possible toxin MazF7

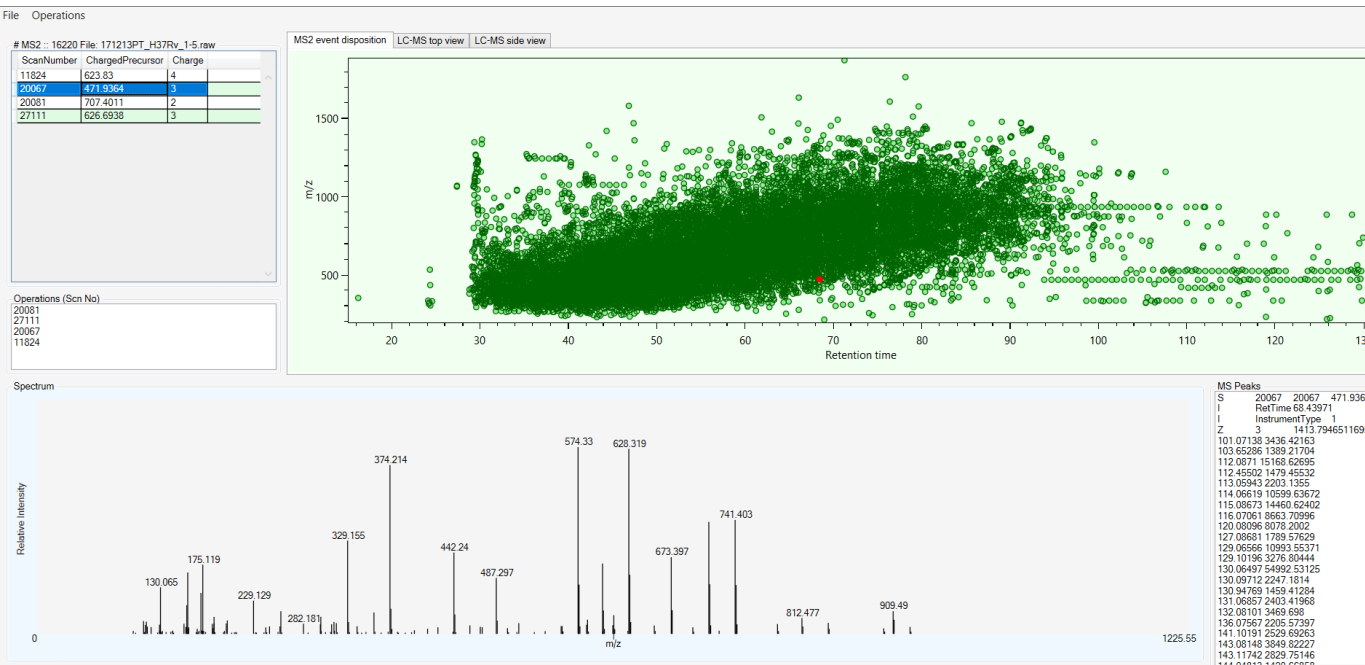

Peptide: RGDLWLVS LG AAR

MS/MS Fragmentation of **RGDLWLVS LG AAR**  
 Found in **WP\_003410654.1** in **NCBIprot**, MULTISPECIES: mRNA interferase MazF7 [Mycobacterium]

Match to Query 1: 1412.787375 from(1413.794651,1+) index(2)  
 Data file Scans MazF7.txt

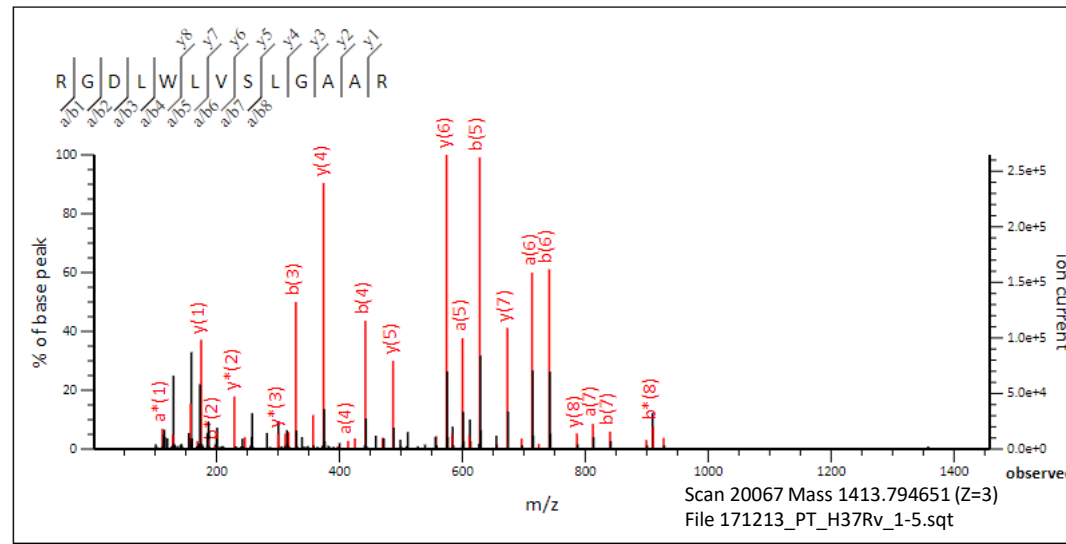

# MazF7 (Rv2063A) Possible toxin MazF7

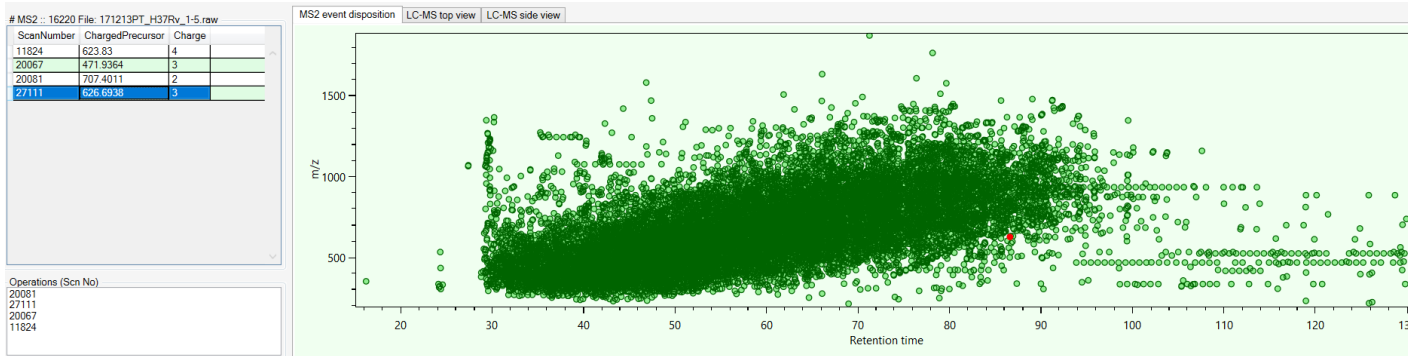

Peptide: AIENALTLILGLPTGPER

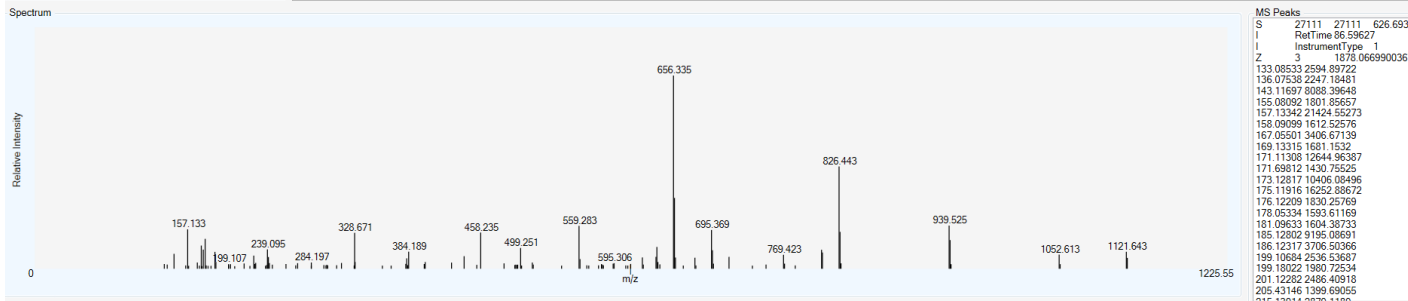

MS/MS Fragmentation of **AIENALTLILGLPTGPER**  
Found in **WP\_003410654.1** in **NCBIprot**, MULTISPECIES: mRNA interferase MazF7 [Mycobacterium]

Match to Query 3: 1877.059714 from(1878.066990,1+) index(4)  
Data file Scans MazF7.txt

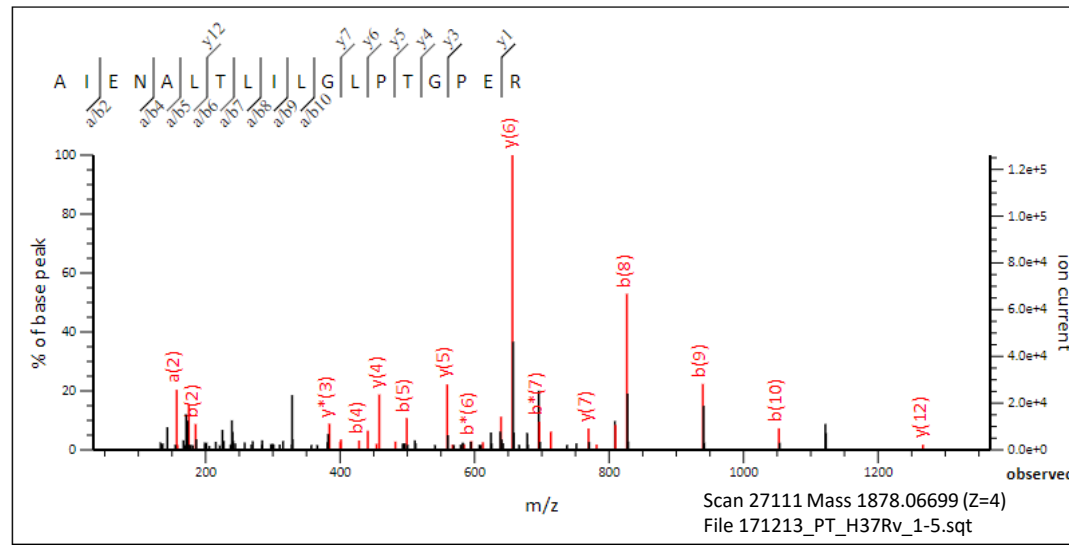

# MbtL (Rv1344) Acyl carrier protein (ACP) MbtL

File Statistics Tools

Control Follow up Result Browser

Spec FDR: 0/0 = NaN% Pep FDR: 0/0 = NaN% Prot FDR: 0/0 = NaN% # Prot (Max Parsimony): 1642 Unique Prot: 1643 Unlabeled Decoys: 0/0

View mode:  Proteins  Proteins Max Pars  Peptides  Scans

| Locus    | Group | GroupType | Length | #UniquePeptides | MolWt  | SequenceCount | SpectrumCount | NSAF                 | Coverage | Protein Score | Description                                                                                           |
|----------|-------|-----------|--------|-----------------|--------|---------------|---------------|----------------------|----------|---------------|-------------------------------------------------------------------------------------------------------|
| 1 P9WQF1 | 890   | Unique    | 84     | 4               | 8945.5 | 4             | 5             | 0.000556871453134169 | 0.869    | 12.5988       | Acyl carrier protein MbtL OS=Mycobacterium tuberculosis (strain ATCC 25618 / H37Rv) GN=mbtL PE=1 SV=1 |

Sequence Explorer

Fasta Coverage Protein Coverage Group view

All peptide labels

**LGVALSEELLTCDTVGELEAAIAAK**  
**LVDDVGLDSVAFVGM(+15.994900)VAIEER**  
**LVDDVGLDSVAFVGMVAIEER**  
**TSSPSTVSTLLSILRDDLNIDLTR**  
**P9WQF1**

Amino Acid Number

■ Protein ■ Coverage

| File Name                 | Scan No | Z | Unique | MeasuredMH  | TheoreticalMH | PPM      | PrimaryScore | SecondaryScore   | DeltaCN | PeaksMatched | BayesianScore | PeptideSequence                       |
|---------------------------|---------|---|--------|-------------|---------------|----------|--------------|------------------|---------|--------------|---------------|---------------------------------------|
| 1 171213_PT_H37Rv_2-6.sqt | 24157   | 3 | True   | 2719.449803 | 2718.451981   | -2.03276 | 3.3616       | 6.40093767661368 | 0.4721  | 32           | 0.79142       | M.TSSPSTVSTLLSILRDDLNIDLTR.V          |
| 2 171213_PT_H37Rv_2-6.sqt | 24052   | 3 | True   | 2703.379917 | 2702.380451   | -1.43672 | 2.4312       | 4.66810998576197 | 0.5038  | 18           | 0.46976       | R.LGVALSEELLTCDTVGELEAAIAAK.Y         |
| 3 171213_PT_H37Rv_2-6.sqt | 24412   | 3 | True   | 2306.182957 | 2305.174425   | 2.247    | 2.4455       | 6.57845153183954 | 0.4686  | 19           | 0.44444       | R.LVDDVGLDSVAFVGMVAIEER.L             |
| 4 171213_PT_H37Rv_2-6.sqt | 24067   | 3 | True   | 2703.37723  | 2702.380451   | -2.43066 | 2.4948       | 6.96644427533082 | 0.4436  | 22           | 0.42201       | R.LGVALSEELLTCDTVGELEAAIAAK.Y         |
| 5 171213_PT_H37Rv_2-6.sqt | 22115   | 3 | True   | 2321.169416 | 2321.169325   | 0.0392   | 1.8657       | 2.46275384514687 | 0.3764  | 19           | 0.3838        | R.LVDDVGLDSVAFVGM(+15.994900)VAIEER.L |

>Mycobacterium tuberculosis H37Rv|Rv1344|mbtL  
 MWRYPLSTRALPNTPGVASFAMTSSPSTVSTLLSILRDDLNIDLTRVTPDAR**LVDDVGLDSVAFVGMVAIEER****LGVALSEELLTCDTVGELEAAIAAK**YRDE

In bold, red and green: Peptide spectra shown in next slides

# MbtL (Rv1344) Acyl carrier protein (ACP) MbtL

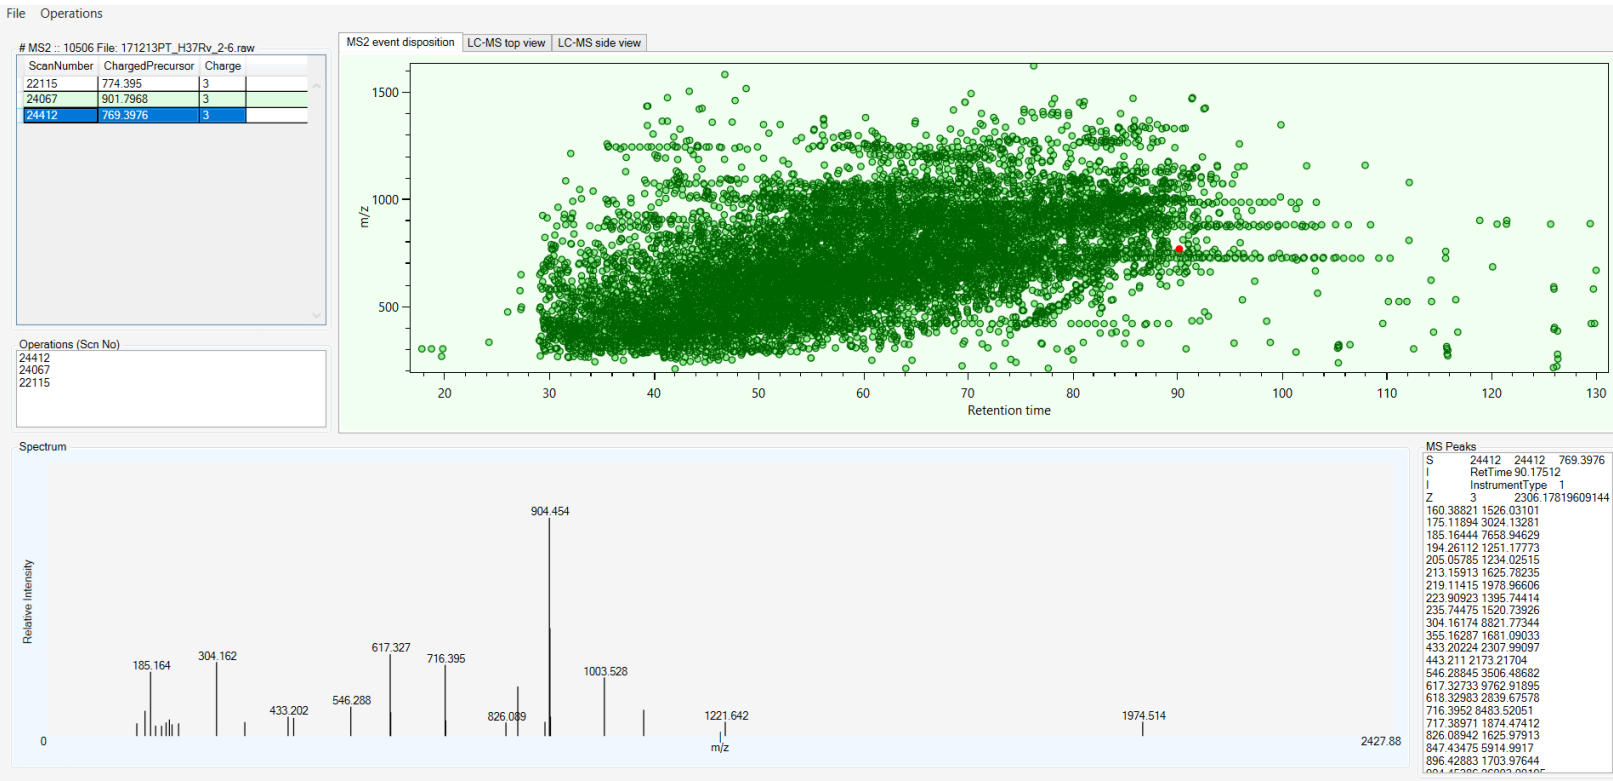

Peptide:

R.LVDDVGLDSVAFVAVGMVAIEER.L

Monoisotopic mass of neutral peptide Mr(calc): 2304.1672  
 Fixed modifications: Carboxymethyl (C) (apply to specified residues or termini only)  
 Ions Score: 94 Expect: 3.5e-05 ([help](#))

| #  | a         | b         | Seq. | y         | y*        | #  |
|----|-----------|-----------|------|-----------|-----------|----|
| 1  | 86.0964   | 114.0913  | L    |           |           | 22 |
| 2  | 185.1648  | 213.1598  | V    | 2192.0904 | 2175.0638 | 21 |
| 3  | 300.1918  | 328.1867  | D    | 2093.0219 | 2075.9954 | 20 |
| 4  | 415.2187  | 443.2136  | D    | 1977.9950 | 1960.9685 | 19 |
| 5  | 514.2871  | 542.2821  | V    | 1862.9681 | 1845.9415 | 18 |
| 6  | 571.3086  | 599.3035  | G    | 1763.8996 | 1746.8731 | 17 |
| 7  | 684.3927  | 712.3876  | L    | 1706.8782 | 1689.8516 | 16 |
| 8  | 799.4196  | 827.4145  | D    | 1593.7941 | 1576.7676 | 15 |
| 9  | 886.4516  | 914.4466  | S    | 1478.7672 | 1461.7406 | 14 |
| 10 | 985.5201  | 1013.5150 | V    | 1391.7351 | 1374.7086 | 13 |
| 11 | 1056.5572 | 1084.5521 | A    | 1292.6667 | 1275.6402 | 12 |
| 12 | 1203.6256 | 1231.6205 | F    | 1221.6296 | 1204.6031 | 11 |
| 13 | 1274.6627 | 1302.6576 | A    | 1074.5612 | 1057.5347 | 10 |
| 14 | 1373.7311 | 1401.7260 | V    | 1003.5241 | 986.4975  | 9  |
| 15 | 1430.7526 | 1458.7475 | G    | 904.4557  | 887.4291  | 8  |
| 16 | 1561.7931 | 1589.7880 | M    | 847.4342  | 830.4077  | 7  |
| 17 | 1660.8615 | 1688.8564 | V    | 716.3937  | 699.3672  | 6  |
| 18 | 1731.8986 | 1759.8935 | A    | 617.3253  | 600.2988  | 5  |
| 19 | 1844.9826 | 1872.9776 | I    | 546.2882  | 529.2617  | 4  |
| 20 | 1974.0252 | 2002.0202 | E    | 433.2041  | 416.1776  | 3  |
| 21 | 2103.0678 | 2131.0628 | E    | 304.1615  | 287.1350  | 2  |
| 22 |           |           | R    | 175.1190  | 158.0924  | 1  |

MS/MS Fragmentation of **LVDDVGLDSVAFVAVGMVAIEER**  
 Found in **Q73ZP6.1** in **NCBIprot**, RecName: Full=Acyl carrier protein MbtL; Short=ACP; AltName: Full=Mycobactin synthase protein L

Match to Query 1: 2304.170920 from(2305.178196,1+) index(2)  
 Data file Scans MbtL.txt

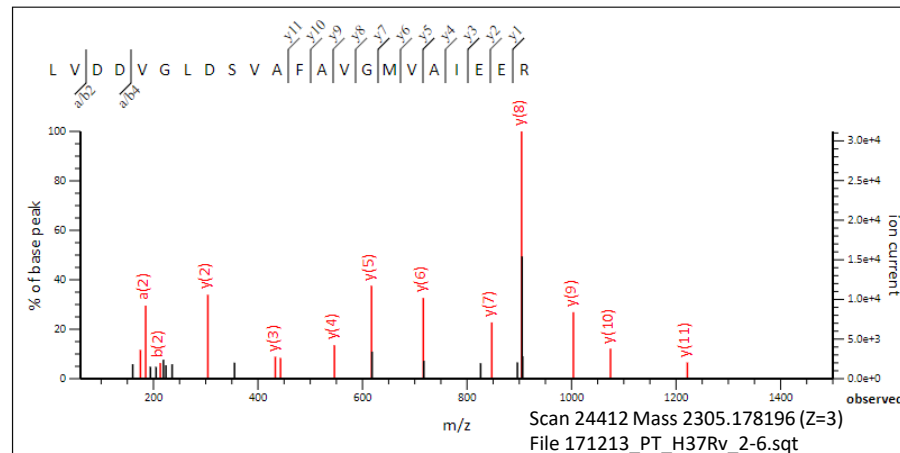

# MbtL (Rv1344) Acyl carrier protein (ACP) MbtL

## Utils :: Mass Spectra File Browser

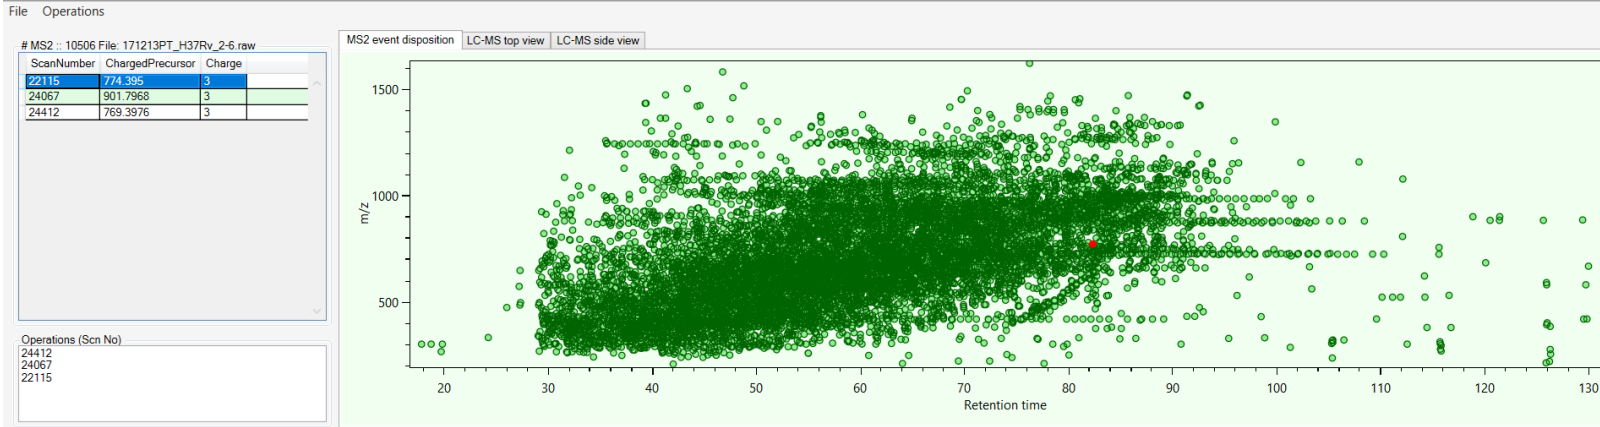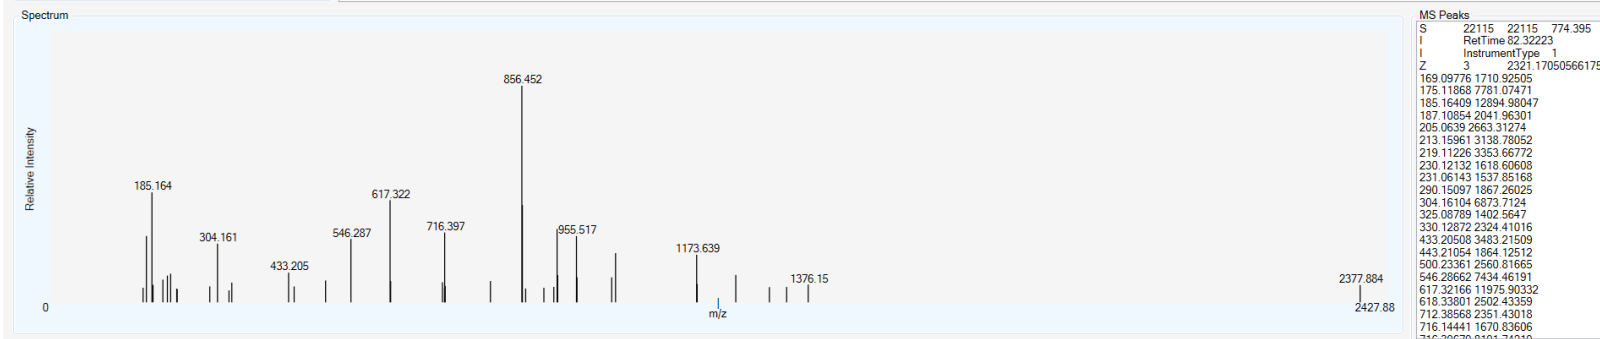

MS/MS Fragmentation of **LVDDVGLDSVAFVGMVAIEER**  
 Found in **Q73ZP6.1** in **NCBIprot**, RecName= Full=Acyl carrier protein MbtL; Short=ACP; AltName= Full=Mycobactin synthase protein L

Match to Query 2: 2320.163230 from(2321.170506,1+) index(0)  
 Data file Scans MbtL.txt

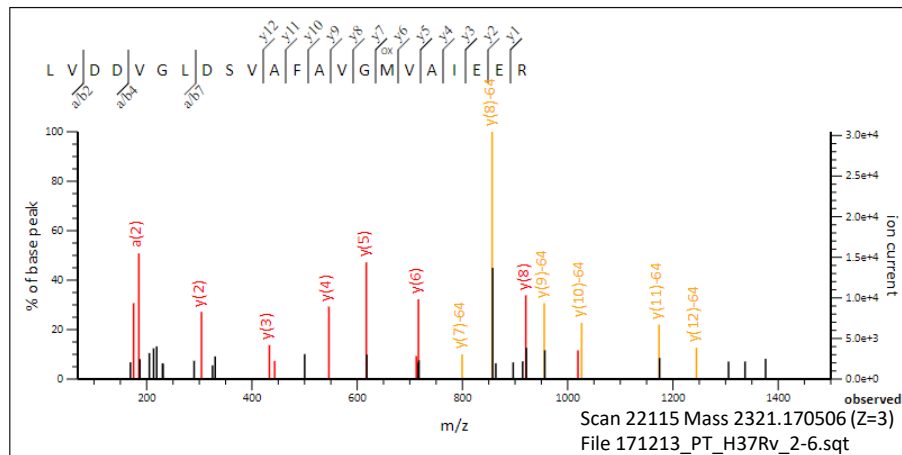

## Peptide:

R.LVDDVGLDSVAFVGM(+15.994900)VAIEER.L

Monoisotopic mass of neutral peptide Mr(calc): 2320.1621  
 Fixed modifications: Carbonylmethyl (C) (apply to specified residues or termini only)  
 Variable modifications:  
 M16 : Oxidation (M), with neutral losses 63.9983(shown in table), 0.0000  
 Ions Score: 77 Expect: 0.0019  
 Matches : 18/126 fragment ions using 29 most intense peaks ([help](#))

| #  | a         | b         | Seq. | y         | y*        | #  |
|----|-----------|-----------|------|-----------|-----------|----|
| 1  | 86.0964   | 114.0913  | L    |           |           | 22 |
| 2  | 185.1648  | 213.1598  | V    | 2144.0870 | 2127.0604 | 21 |
| 3  | 300.1918  | 328.1867  | D    | 2045.0186 | 2027.9920 | 20 |
| 4  | 415.2187  | 443.2136  | D    | 1929.9916 | 1912.9651 | 19 |
| 5  | 514.2871  | 542.2821  | V    | 1814.9647 | 1797.9381 | 18 |
| 6  | 571.3086  | 599.3035  | G    | 1715.8963 | 1698.8697 | 17 |
| 7  | 684.3927  | 712.3876  | L    | 1658.8748 | 1641.8483 | 16 |
| 8  | 799.4196  | 827.4145  | D    | 1545.7908 | 1528.7642 | 15 |
| 9  | 886.4516  | 914.4466  | S    | 1430.7638 | 1413.7373 | 14 |
| 10 | 985.5201  | 1013.5150 | V    | 1343.7318 | 1326.7052 | 13 |
| 11 | 1056.5572 | 1084.5521 | A    | 1244.6634 | 1227.6368 | 12 |
| 12 | 1203.6256 | 1231.6205 | F    | 1173.6263 | 1156.5997 | 11 |
| 13 | 1274.6627 | 1302.6576 | A    | 1026.5578 | 1009.5313 | 10 |
| 14 | 1373.7311 | 1401.7260 | V    | 955.5207  | 938.4942  | 9  |
| 15 | 1430.7526 | 1458.7475 | G    | 856.4523  | 839.4258  | 8  |
| 16 | 1513.7897 | 1541.7846 | M    | 799.4308  | 782.4043  | 7  |
| 17 | 1612.8581 | 1640.8530 | V    | 716.3937  | 699.3672  | 6  |
| 18 | 1683.8952 | 1711.8901 | A    | 617.3253  | 600.2988  | 5  |
| 19 | 1796.9793 | 1824.9742 | I    | 546.2882  | 529.2617  | 4  |
| 20 | 1926.0219 | 1954.0168 | E    | 433.2041  | 416.1776  | 3  |
| 21 | 2055.0645 | 2083.0594 | E    | 304.1615  | 287.1350  | 2  |
| 22 |           |           | R    | 175.1190  | 158.0924  | 1  |



# MbtL (Rv1344) Acyl carrier protein (ACP) MbtL

File Operations

# MS2 : 10506 File: 171213PT\_H37Rv\_2-6.raw

| ScanNumber | ChargedPrecursor | Charge |
|------------|------------------|--------|
| 22115      | 774.395          | 3      |
| 24067      | 901.7968         | 3      |
| 24412      | 769.3976         | 3      |

Operations (Scn No)

24412  
24067  
22115

MS2 event disposition LC-MS top view LC-MS side view

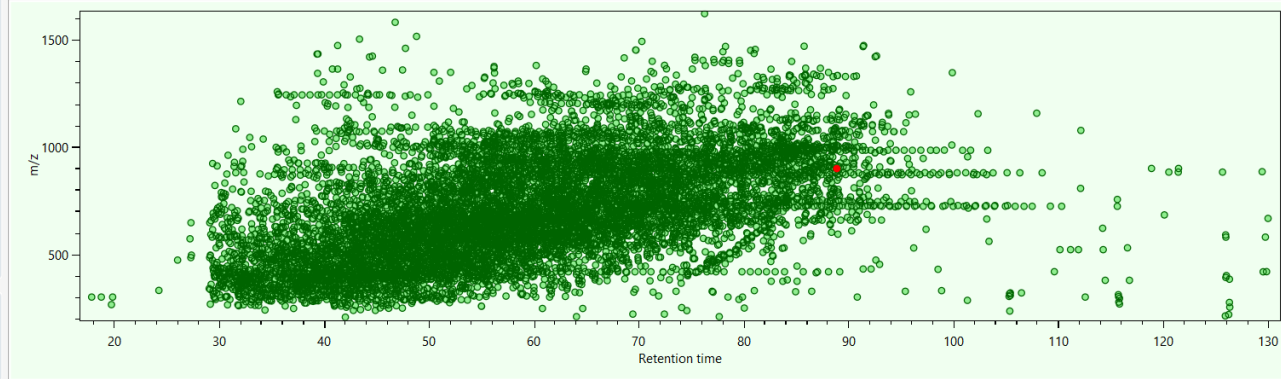

**Peptide:**  
R.LGVALSEEELLTCDTVGELEAAIAAK.Y

Spectrum

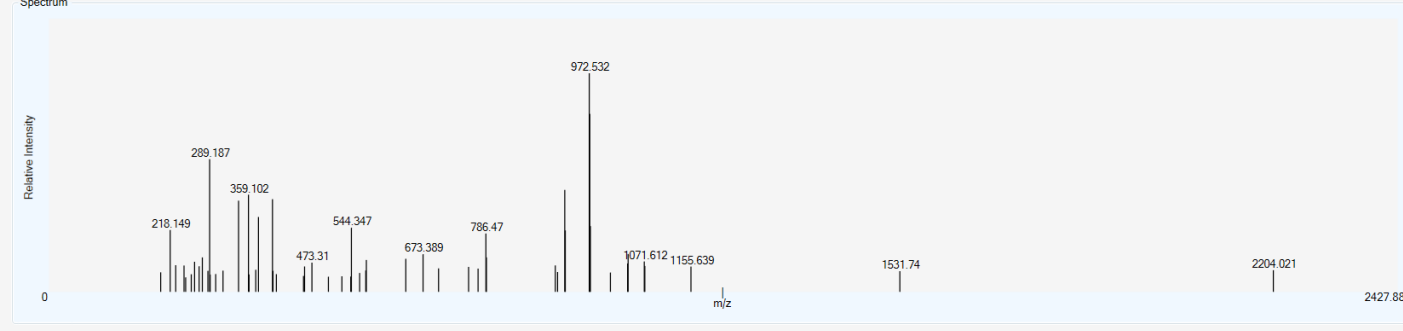

MS Peaks

| S | 24067     | 24067          | 901.7968        |
|---|-----------|----------------|-----------------|
| I |           | RetTime        | 88.86188        |
| I |           | InstrumentType | 1               |
| Z | 3         |                | 2703.3757065706 |
|   | 201.12325 | 1966.03603     |                 |
|   | 218.14899 | 6215.26758     |                 |
|   | 228.13333 | 2678.50293     |                 |
|   | 243.13339 | 2646.2417      |                 |
|   | 246.08165 | 1459.82629     |                 |
|   | 256.16498 | 1775.8772      |                 |
|   | 262.08609 | 3023.99463     |                 |
|   | 270.17966 | 2576.29028     |                 |
|   | 276.06559 | 3466.73535     |                 |
|   | 286.10434 | 2111.9126      |                 |
|   | 289.1871  | 13337.43945    |                 |
|   | 290.18945 | 1735.82202     |                 |
|   | 300.15833 | 1790.54858     |                 |
|   | 313.22321 | 2132.90112     |                 |
|   | 341.21854 | 9160.98805     |                 |
|   | 359.10199 | 9760.72559     |                 |
|   | 360.10355 | 1752.99329     |                 |
|   | 372.17712 | 2221.01221     |                 |
|   | 377.11304 | 7521.22266     |                 |
|   | 402.27271 | 9311.7666      |                 |
|   | 403.27356 | 2114.43848     |                 |
|   | 460.27356 | 3703.63663     |                 |

MS/MS Fragmentation of **LGVALSEELLTCDTVGELEAAIAAK**  
Found in **KBE54844.1** in **NCBIprot**, acyl carrier protein MbtL [Mycobacterium tuberculosis H2102]

Match to Query 2: 2702.368430 from(2703.375706,1+) index(1)  
Data file Scans MbtL.txt

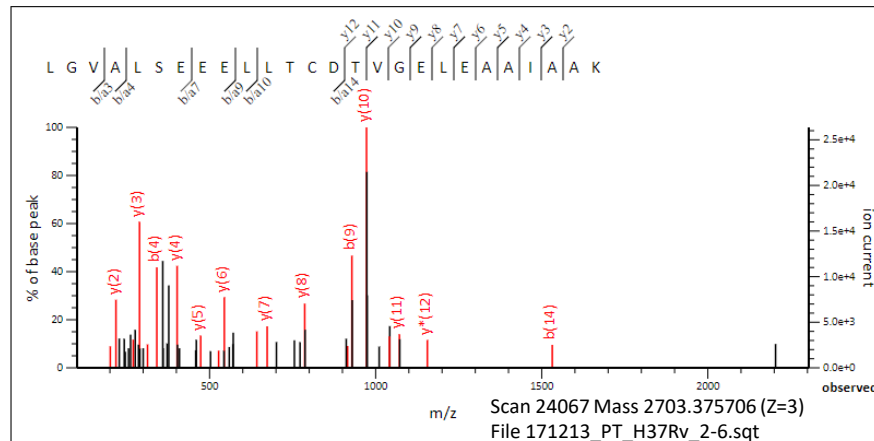

Supplement: pone.0221837.s004.pdf [file pone.0221837.s004.pdf]
