# Supplementary material for: Integrative proteomic and glycoproteomic profiling of Mycobacterium tuberculosis culture filtrate
Source: PubMed Central journal article supplement (PMC7053730; doi:10.1371/journal.pone.0221837), 2020-03-03

# Probable conserved lipoprotein DsbF (Rv1677) Modification: Hex-Hex

| File Name               | Scan No | Z | Unique | MeasuredMH  | TheoreticalMH | PPM      | PrimaryScore | SecondaryScore    | DeltaCN | PeaksMatched | BayesianScore | PeptideSequence                                   |
|-------------------------|---------|---|--------|-------------|---------------|----------|--------------|-------------------|---------|--------------|---------------|---------------------------------------------------|
| 171213_PT_H37Rv_1-5.sqt | 23510   | 4 | True   | 4023.931051 | 4022.930772   | -0.76318 | 3.7776       | 12.5207833903699  | 0.5146  | 48           | 0.63195       | K.TFTQLADTDGSVWVWVNGVVTQQPAYAFVDPHGNDVVR.G        |
| 171213_PT_H37Rv_1-5.sqt | 23537   | 3 | True   | 4025.932224 | 4022.930772   | -2.13565 | 3.23         | 11.2660653870387  | 0.5172  | 34           | 0.61561       | K.TFTQLADTDGSVWVWVNGVVTQQPAYAFVDPHGNDVVR.G        |
| 171213_PT_H37Rv_1-5.sqt | 14987   | 3 | True   | 3403.688206 | 3402.691054   | -1.82097 | 3.433        | 9.45752050111863  | 0.4195  | 28           | 0.53295       | K.SQPAVAPTGDAAAAT(+324.105600)QVPAGQTVPAQLQFSAK.T |
| 171213_PT_H37Rv_1-5.sqt | 5339    | 2 | True   | 995.445299  | 995.446222    | -0.92722 | 1.3154       | 0.179126665897435 | 0.274   | 7            | 0.37592       | R.M(+15.994900)SQDELTR.R                          |
| 171213_PT_H37Rv_1-5.sqt | 6210    | 3 | True   | 1135.551226 | 1135.552433   | -1.06292 | 1.6862       | 0.603306476560156 | 0.1518  | 12           | 0.33335       | R.MSQDELTRR.V                                     |

All peptide labels  Infer Domains

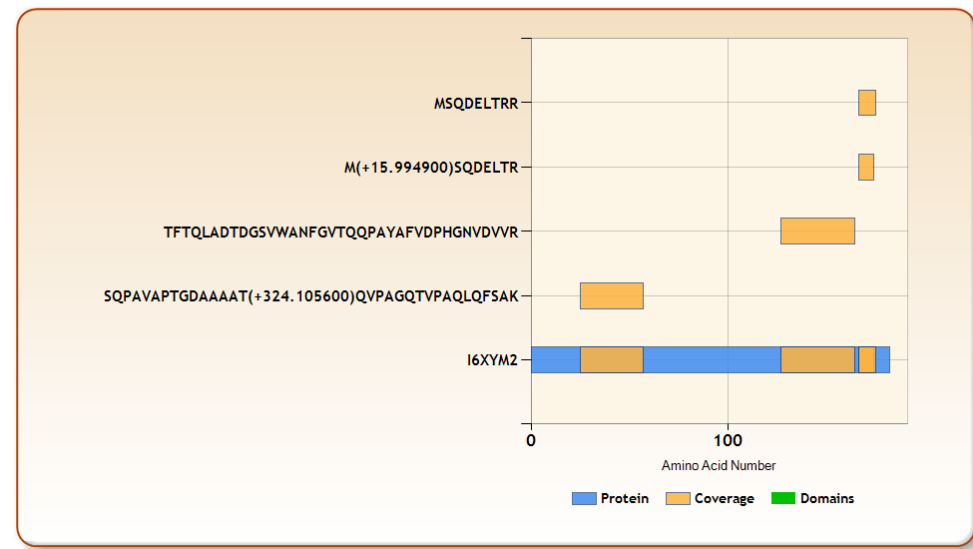

## Peptide View

MS/MS Fragmentation of **SQPAVAPTGDAAAATQVPAGQTVPAQLQFSAK**  
Found in **AFE16571.1** in **NCBIprot**, putative lipoprotein DSBF [Mycobacterium tuberculosis RGTB327]

Match to Query 4: 3401.680930 from(3402.688206,1+) index(1)  
Data file Scans DsbF Hex-Hex Mascot.txt

171213\_PT\_H37Rv\_1-5.sqt  
Scan=14987 z=3

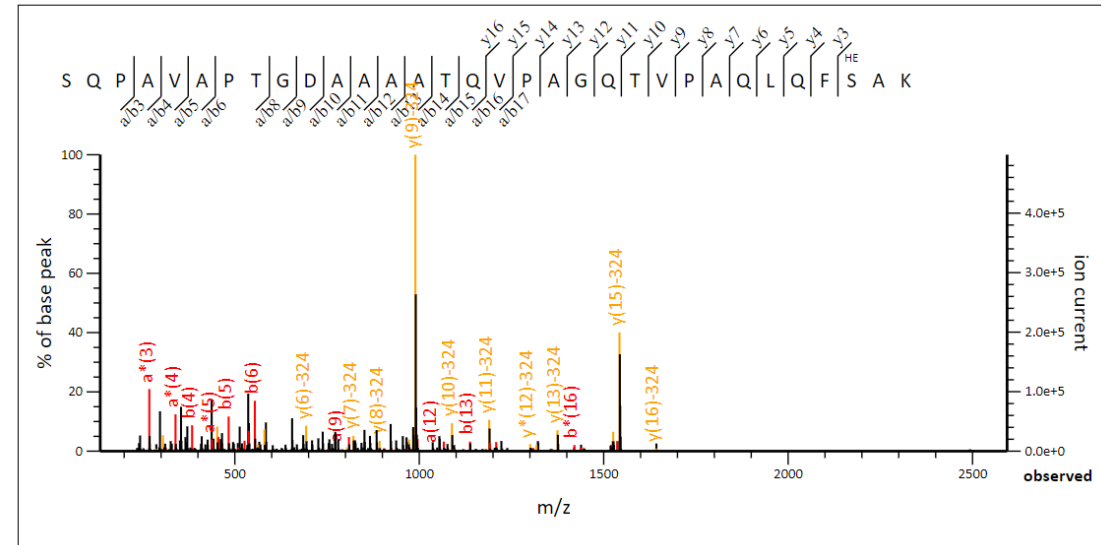

## Protein family 1 (out of 1)

10 per page 1

Accession contains

| Accession                      | Score | Mass  | Matches | Sequences                                                            |
|--------------------------------|-------|-------|---------|----------------------------------------------------------------------|
| <b>AFE16571.1</b>              | 75    | 19224 | 2 (2)   | putative lipoprotein DSBF [Mycobacterium tuberculosis RGTB327]       |
| 1.1 <a href="#">AFE16571.1</a> | 75    | 19224 | 2 (2)   | 1 (1) putative lipoprotein DSBF [Mycobacterium tuberculosis RGTB327] |

▶ 23 same sets of AFE16571.1

## ▶ 2 peptide matches (1 non-duplicate, 1 duplicate)

Auto-fit to window

| Query | Dupes | Observed  | Mr (expt) | Mr (calc) | ppm   | M | Score | Expect  | Rank | U | Peptide                                            |
|-------|-------|-----------|-----------|-----------|-------|---|-------|---------|------|---|----------------------------------------------------|
| 4     | 1     | 3402.6882 | 3401.6809 | 3401.6838 | -0.85 | 0 | 48    | 9.2e-05 | 1    | U | K.SQPAVAPTGDAAAATQVPAGQTVPAQLQFSAK.T + Hex(2) (ST) |
| 3     |       | 3402.6834 | 3401.6762 | 3401.6838 | -2.25 | 0 | (47)  | 0.00012 | 1    | U | K.SQPAVAPTGDAAAATQVPAGQTVPAQLQFSAK.T + Hex(2) (ST) |

## Mascot Score Histogram

Ions score is  $-10 \cdot \log(P)$ , where P is the probability that the observed match is a random event. Individual ions scores  $> 38$  indicate identity or extensive homology ( $p < 0.05$ ). Protein scores are derived from ions scores as a non-probabilistic basis for ranking protein hits.

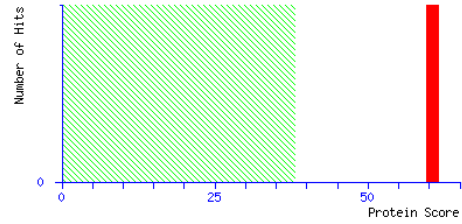

## Peptide Summary Report

Format As: Peptide Summary [Help](#)

Significance threshold  $p < 0.05$  Max. number of hits: AUTO

Standard scoring:  MudPIT scoring  Display non-significant matches  Show sub-sets: 0

Show pop-ups:  Suppress pop-ups  Sort unassigned: Decreasing Score  Require bold red

Preferred taxonomy: All entries

Select All Select None Search Selected  Error tolerant

1. [CKZ21714.1](#) Mass: 12789 Score: 61 Matches: 3(3) Sequences: 1(1)  
lipoprotein [Mycobacterium tuberculosis]
- Check to include this hit in error tolerant search

| Query                                 | Observed  | Mr(expt)  | Mr(calc)  | ppm   | Miss | Score | Expect  | Rank | Unique | Peptide                       |
|---------------------------------------|-----------|-----------|-----------|-------|------|-------|---------|------|--------|-------------------------------|
| <input checked="" type="checkbox"/> 1 | 1336.6320 | 1335.6247 | 1335.6266 | -1.44 | 0    | (45)  | 0.017   | 1    | U      | R.TATPSESGTQTR.V              |
| <input checked="" type="checkbox"/> 2 | 1498.6841 | 1497.6769 | 1497.6795 | -1.75 | 0    | 61    | 0.00034 | 1    | U      | R.TATPSESGTQTR.V + Hex (ST)   |
| <input checked="" type="checkbox"/> 3 | 1660.7371 | 1659.7298 | 1659.7323 | -1.49 | 0    | (48)  | 0.0048  | 1    | U      | R.TATPSESGTQTR.V + 2 Hex (ST) |

[Sequence Explorer](#)

Fasta Coverage Protein Coverage Group view

All peptide labels  Infer Domains

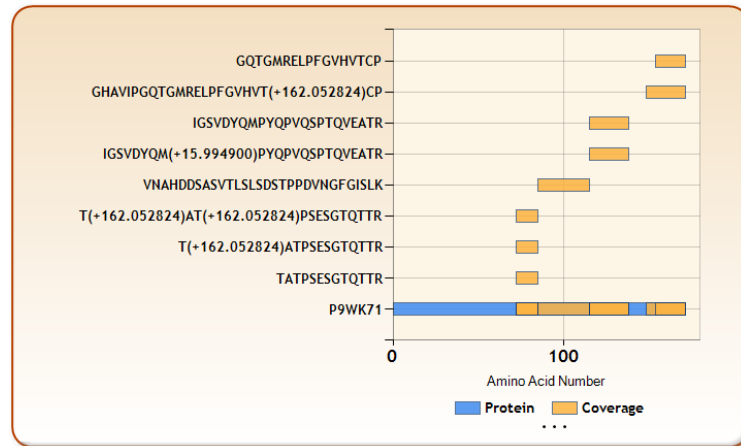

# Lipoprotein O (LppO, Rv2290) Modification: Hex

Match to Query 1: 1335.624730 from(1336.632006,1+) index(2)  
Data file P9WK71 R1-5.txt

171213\_PT\_H37Rv\_1-5.sqt  
Scan=3796 z=2

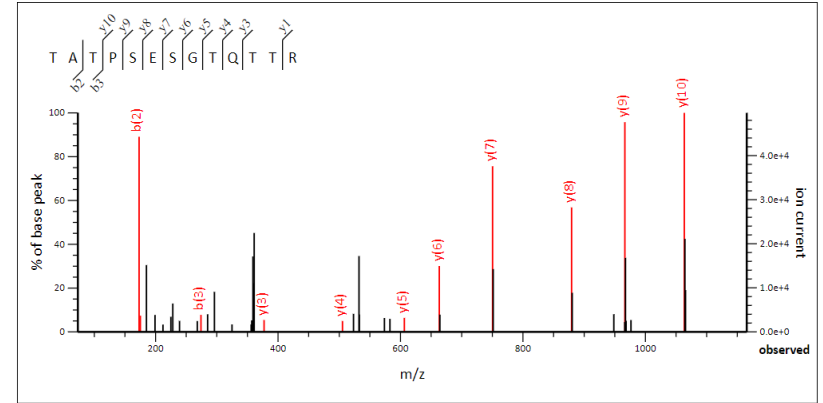

Match to Query 2: 1497.676854 from(1498.684130,1+) index(1)  
Data file P9WK71 R1-5.txt

171213\_PT\_H37Rv\_1-5.sqt  
Scan=3473 z=2

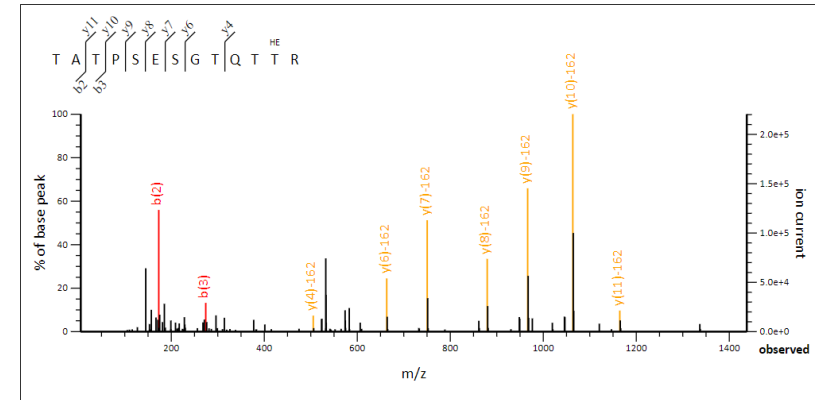

Match to Query 3: 1659.729832 from(1660.737108,1+) index(0)  
Data file P9WK71 R1-5.txt

171213\_PT\_H37Rv\_1-5.sqt  
Scan=3439 z=2

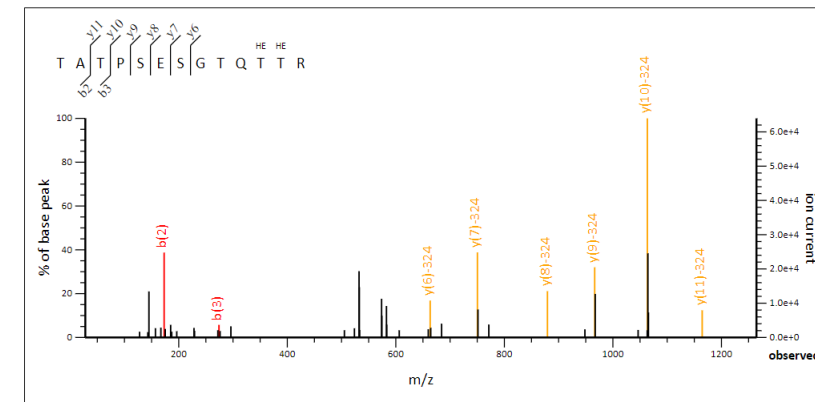

# Periplasmic phosphate-binding lipoprotein PstS1 (Rv0934)

Modification: Hex

MS/MS Fragmentation of **PANQAISMIDGYPDGYPHIINYEYAIVNNR**

Found in **WP\_014585113.1** in **NCBIprot**, phosphate ABC transporter substrate-binding protein PstS [Mycobacterium tuberculosis]

Match to Query 3: 3453.638816 from(3454.646092,1+) index(2)

Data file Scans pstS1 Hex Mascot.txt

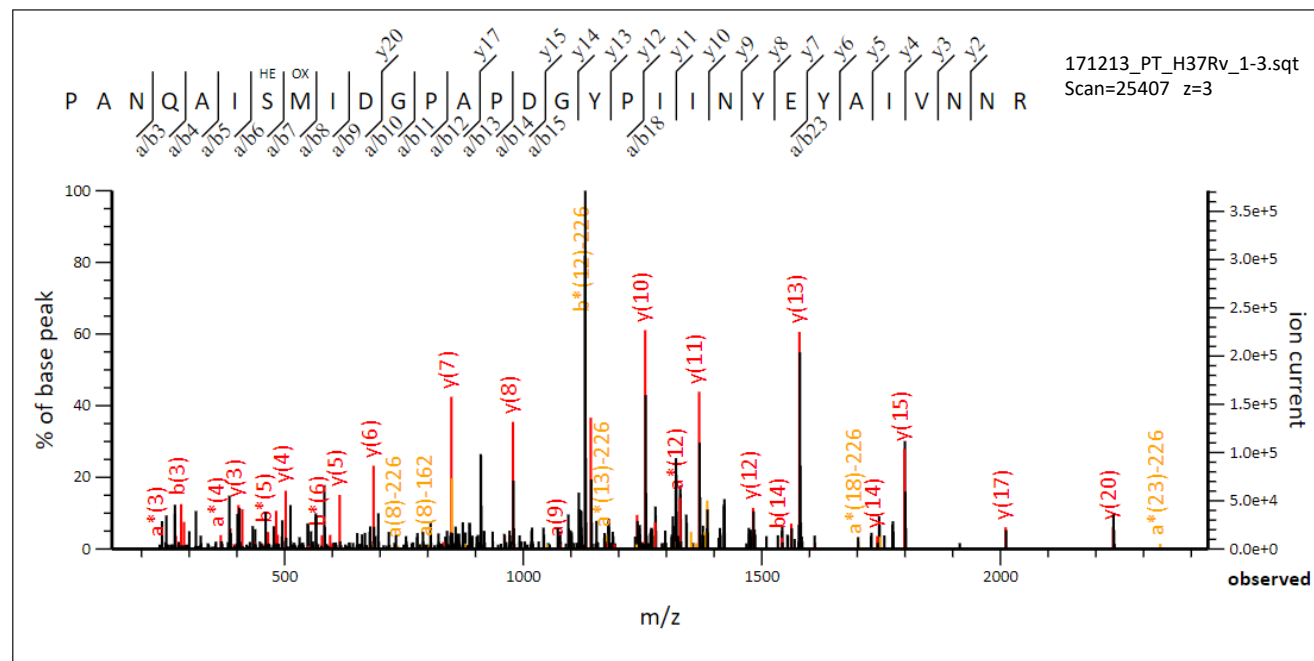

| #  | a                | a*               | b                | b*              | Seq. | y                | y*               | #  |
|----|------------------|------------------|------------------|-----------------|------|------------------|------------------|----|
| 1  | 70.0651          |                  | 98.0600          |                 | P    |                  |                  | 30 |
| 2  | 141.1022         |                  | 169.0972         |                 | A    | 3357.5944        | 3340.5678        | 29 |
| 3  | <b>255.1452</b>  | <b>238.1186</b>  | <b>283.1401</b>  | 266.1135        | N    | 3286.5573        | 3269.5307        | 28 |
| 4  | 383.2037         | <b>366.1772</b>  | <b>411.1987</b>  | <b>394.1721</b> | Q    | 3172.5143        | 3155.4878        | 27 |
| 5  | <b>454.2409</b>  | <b>437.2143</b>  | <b>482.2358</b>  | <b>465.2092</b> | A    | 3044.4557        | 3027.4292        | 26 |
| 6  | <b>567.3249</b>  | <b>550.2984</b>  | <b>595.3198</b>  | <b>578.2933</b> | I    | 2973.4186        | 2956.3921        | 25 |
| 7  | 816.4098         | 799.3832         | 844.4047         | 827.3781        | S    | 2860.3346        | 2843.3080        | 24 |
| 8  | 963.4452         | 946.4186         | 991.4401         | <b>974.4135</b> | M    | 2611.2497        | 2594.2232        | 23 |
| 9  | <b>1076.5292</b> | 1059.5027        | 1104.5242        | 1087.4976       | I    | 2464.2143        | 2447.1878        | 22 |
| 10 | <b>1191.5562</b> | <b>1174.5296</b> | 1219.5511        | 1202.5245       | D    | 2351.1303        | 2334.1037        | 21 |
| 11 | <b>1248.5776</b> | 1231.5511        | <b>1276.5726</b> | 1259.5460       | G    | <b>2236.1033</b> | 2219.0768        | 20 |
| 12 | 1345.6304        | <b>1328.6039</b> | <b>1373.6253</b> | 1356.5988       | P    | 2179.0818        | 2162.0553        | 19 |
| 13 | 1416.6675        | 1399.6410        | 1444.6624        | 1427.6359       | A    | 2082.0291        | 2065.0025        | 18 |
| 14 | 1513.7203        | 1496.6937        | <b>1541.7152</b> | 1524.6887       | P    | <b>2010.9920</b> | 1993.9654        | 17 |
| 15 | 1628.7472        | <b>1611.7207</b> | 1656.7421        | 1639.7156       | D    | 1913.9392        | 1896.9127        | 16 |
| 16 | 1685.7687        | 1668.7421        | 1713.7636        | 1696.7371       | G    | <b>1798.9123</b> | 1781.8857        | 15 |
| 17 | 1848.8320        | 1831.8055        | 1876.8269        | 1859.8004       | Y    | <b>1741.8908</b> | 1724.8642        | 14 |
| 18 | 1945.8848        | 1928.8582        | 1973.8797        | 1956.8532       | P    | <b>1578.8275</b> | <b>1561.8009</b> | 13 |
| 19 | 2058.9689        | 2041.9423        | 2086.9638        | 2069.9372       | I    | <b>1481.7747</b> | 1464.7482        | 12 |
| 20 | 2172.0529        | 2155.0264        | 2200.0478        | 2183.0213       | I    | <b>1368.6906</b> | <b>1351.6641</b> | 11 |
| 21 | 2286.0958        | 2269.0693        | 2314.0908        | 2297.0642       | N    | <b>1255.6066</b> | <b>1238.5800</b> | 10 |
| 22 | 2449.1592        | 2432.1326        | 2477.1541        | 2460.1275       | Y    | <b>1141.5636</b> | <b>1124.5371</b> | 9  |
| 23 | 2578.2018        | 2561.1752        | 2606.1967        | 2589.1701       | E    | <b>978.5003</b>  | <b>961.4738</b>  | 8  |
| 24 | 2741.2651        | 2724.2385        | 2769.2600        | 2752.2335       | Y    | <b>849.4577</b>  | <b>832.4312</b>  | 7  |
| 25 | 2812.3022        | 2795.2757        | 2840.2971        | 2823.2706       | A    | <b>686.3944</b>  | <b>669.3678</b>  | 6  |
| 26 | 2925.3863        | 2908.3597        | 2953.3812        | 2936.3546       | I    | <b>615.3573</b>  | <b>598.3307</b>  | 5  |
| 27 | 3024.4547        | 3007.4281        | 3052.4496        | 3035.4231       | V    | <b>502.2732</b>  | <b>485.2467</b>  | 4  |
| 28 | 3138.4976        | 3121.4711        | 3166.4925        | 3149.4660       | N    | <b>403.2048</b>  | <b>386.1783</b>  | 3  |
| 29 | 3252.5405        | 3235.5140        | 3280.5355        | 3263.5089       | N    | <b>289.1619</b>  | <b>272.1353</b>  | 2  |
| 30 |                  |                  |                  |                 | R    | 175.1190         | 158.0924         | 1  |

Conserved protein with FHA domain, FhaA (Rv0020c)  
Modification: Hex

MS/MS Fragmentation of **EGSYVPSGPPGPEQRPAYPDQGGYDQGYQQGATTYGR**  
Found in **WP\_003912368.1** in **NCBIprot**, phosphopeptide-binding protein [Mycobacterium tuberculosis]

Match to Query 3: 4350.924996 from(4351.932272,1+) index(2)  
Data file Scans FhaA Hex-Hex-Hex Mascot.txt

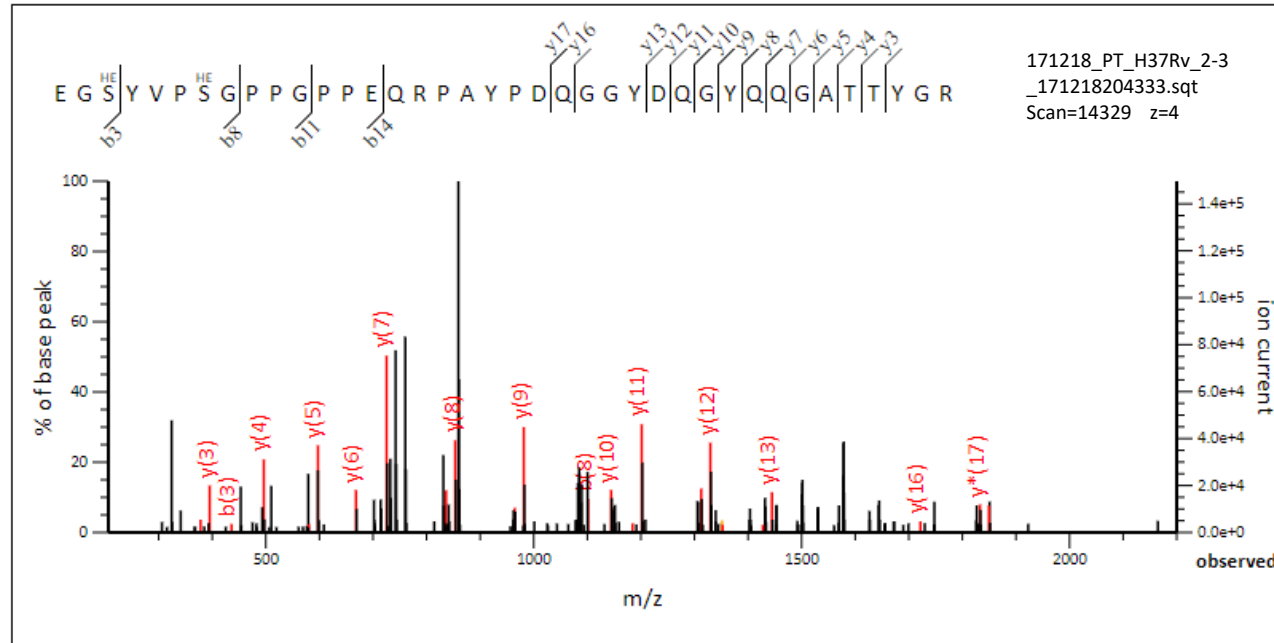

| #  | a         | a*        | b                | b*        | Seq. | y                | y*               | #  |
|----|-----------|-----------|------------------|-----------|------|------------------|------------------|----|
| 1  | 102.0550  |           | 130.0499         |           | E    |                  |                  | 38 |
| 2  | 159.0764  |           | 187.0713         |           | G    | 4222.8748        | 4205.8483        | 37 |
| 3  | 408.1613  |           | <b>436.1562</b>  |           | S    | 4165.8534        | 4148.8268        | 36 |
| 4  | 571.2246  |           | 599.2195         |           | Y    | 3916.7685        | 3899.7420        | 35 |
| 5  | 670.2930  |           | 698.2879         |           | V    | 3753.7052        | 3736.6786        | 34 |
| 6  | 767.3458  |           | 795.3407         |           | P    | 3654.6368        | 3637.6102        | 33 |
| 7  | 1016.4306 |           | 1044.4255        |           | S    | 3557.5840        | 3540.5575        | 32 |
| 8  | 1073.4521 |           | <b>1101.4470</b> |           | G    | 3308.4992        | 3291.4726        | 31 |
| 9  | 1170.5049 |           | 1198.4998        |           | P    | 3251.4777        | 3234.4512        | 30 |
| 10 | 1267.5576 |           | 1295.5525        |           | P    | 3154.4249        | 3137.3984        | 29 |
| 11 | 1324.5791 |           | <b>1352.5740</b> |           | G    | 3057.3722        | 3040.3456        | 28 |
| 12 | 1421.6318 |           | 1449.6268        |           | P    | 3000.3507        | 2983.3242        | 27 |
| 13 | 1518.6846 |           | 1546.6795        |           | P    | 2903.2979        | 2886.2714        | 26 |
| 14 | 1647.7272 |           | 1675.7221        |           | E    | 2806.2452        | 2789.2186        | 25 |
| 15 | 1775.7858 | 1758.7592 | 1803.7807        | 1786.7541 | Q    | 2677.2026        | 2660.1760        | 24 |
| 16 | 1931.8869 | 1914.8603 | 1959.8818        | 1942.8553 | R    | 2549.1440        | 2532.1175        | 23 |
| 17 | 2028.9397 | 2011.9131 | 2056.9346        | 2039.9080 | P    | 2393.0429        | 2376.0164        | 22 |
| 18 | 2099.9768 | 2082.9502 | 2127.9717        | 2110.9451 | A    | 2295.9901        | 2278.9636        | 21 |
| 19 | 2263.0401 | 2246.0136 | 2291.0350        | 2274.0085 | Y    | 2224.9530        | 2207.9265        | 20 |
| 20 | 2360.0929 | 2343.0663 | 2388.0878        | 2371.0612 | P    | 2061.8897        | 2044.8631        | 19 |
| 21 | 2475.1198 | 2458.0933 | 2503.1147        | 2486.0882 | D    | 1964.8369        | 1947.8104        | 18 |
| 22 | 2603.1784 | 2586.1518 | 2631.1733        | 2614.1468 | Q    | <b>1849.8100</b> | <b>1832.7834</b> | 17 |
| 23 | 2660.1999 | 2643.1733 | 2688.1948        | 2671.1682 | G    | <b>1721.7514</b> | 1704.7249        | 16 |
| 24 | 2717.2213 | 2700.1948 | 2745.2162        | 2728.1897 | G    | 1664.7299        | 1647.7034        | 15 |
| 25 | 2880.2846 | 2863.2581 | 2908.2796        | 2891.2530 | Y    | 1607.7085        | 1590.6819        | 14 |
| 26 | 2995.3116 | 2978.2850 | 3023.3065        | 3006.2800 | D    | <b>1444.6452</b> | <b>1427.6186</b> | 13 |
| 27 | 3123.3702 | 3106.3436 | 3151.3651        | 3134.3385 | Q    | <b>1329.6182</b> | <b>1312.5917</b> | 12 |
| 28 | 3180.3916 | 3163.3651 | 3208.3865        | 3191.3600 | G    | <b>1201.5596</b> | <b>1184.5331</b> | 11 |
| 29 | 3343.4550 | 3326.4284 | 3371.4499        | 3354.4233 | Y    | <b>1144.5382</b> | 1127.5116        | 10 |
| 30 | 3471.5135 | 3454.4870 | 3499.5085        | 3482.4819 | Q    | <b>981.4748</b>  | <b>964.4483</b>  | 9  |
| 31 | 3599.5721 | 3582.5456 | 3627.5670        | 3610.5405 | Q    | <b>853.4163</b>  | <b>836.3897</b>  | 8  |
| 32 | 3656.5936 | 3639.5670 | 3684.5885        | 3667.5619 | G    | <b>725.3577</b>  | 708.3311         | 7  |
| 33 | 3727.6307 | 3710.6041 | 3755.6256        | 3738.5991 | A    | <b>668.3362</b>  | 651.3097         | 6  |
| 34 | 3828.6784 | 3811.6518 | 3856.6733        | 3839.6467 | T    | <b>597.2991</b>  | <b>580.2726</b>  | 5  |
| 35 | 3929.7261 | 3912.6995 | 3957.7210        | 3940.6944 | T    | <b>496.2514</b>  | 479.2249         | 4  |
| 36 | 4092.7894 | 4075.7628 | 4120.7843        | 4103.7577 | Y    | <b>395.2037</b>  | <b>378.1772</b>  | 3  |
| 37 | 4149.8108 | 4132.7843 | 4177.8058        | 4160.7792 | G    | 232.1404         | 215.1139         | 2  |
| 38 |           |           |                  |           | R    | 175.1190         | 158.0924         | 1  |



## Two component transcriptional regulatory protein DevR (Rv3133c) Modification: Hex-Hex

MS/MS Fragmentation of **LSGLTDQERTLLGLLSEGLTNKQIADR**

Found in **AFE17937.1** in **NCBIprot**, two component transcriptional regulatory protein [Mycobacterium tuberculosis RGTB327]

Match to Query 3: 3264.691184 from(3265.698460,1+) index(1)

Data file Scans DevR Hex-Hex Mascot.txt

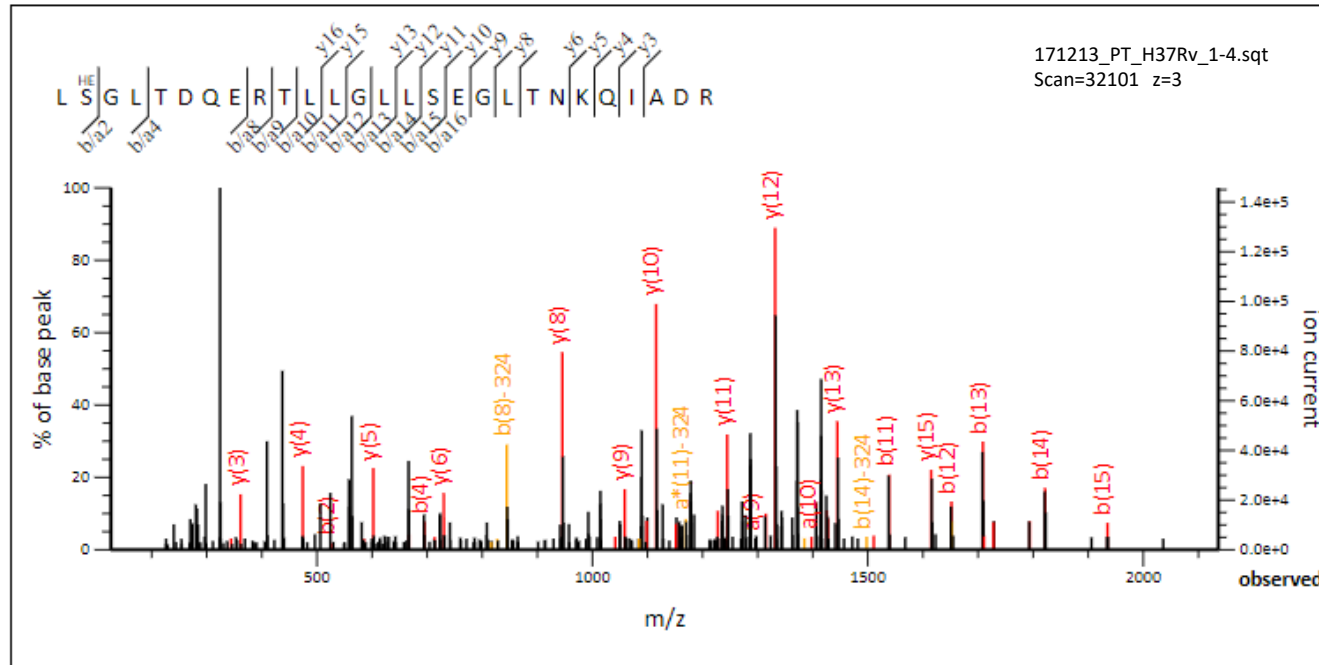

| #  | a                | a*        | b                | b*               | Seq. | y                | y*               | #  |
|----|------------------|-----------|------------------|------------------|------|------------------|------------------|----|
| 1  | 86.0964          |           | 114.0913         |                  | L    |                  |                  | 27 |
| 2  | 497.2341         |           | <b>525.2290</b>  |                  | S    | 3152.6169        | 3135.5903        | 26 |
| 3  | 554.2556         |           | 582.2505         |                  | G    | 2741.4792        | 2724.4527        | 25 |
| 4  | <b>667.3396</b>  |           | <b>695.3345</b>  |                  | L    | 2684.4577        | 2667.4312        | 24 |
| 5  | 768.3873         |           | 796.3822         |                  | T    | 2571.3737        | 2554.3471        | 23 |
| 6  | 883.4143         |           | 911.4092         |                  | D    | 2470.3260        | 2453.2994        | 22 |
| 7  | 1011.4728        | 994.4463  | 1039.4677        | 1022.4412        | Q    | 2355.2990        | 2338.2725        | 21 |
| 8  | 1140.5154        | 1123.4889 | 1168.5103        | <b>1151.4838</b> | E    | 2227.2405        | 2210.2139        | 20 |
| 9  | <b>1296.6165</b> | 1279.5900 | 1324.6114        | 1307.5849        | R    | 2098.1979        | 2081.1713        | 19 |
| 10 | <b>1397.6642</b> | 1380.6377 | <b>1425.6591</b> | 1408.6326        | T    | 1942.0968        | 1925.0702        | 18 |
| 11 | <b>1510.7483</b> | 1493.7217 | <b>1538.7432</b> | 1521.7166        | L    | 1841.0491        | 1824.0225        | 17 |
| 12 | 1623.8323        | 1606.8058 | <b>1651.8273</b> | 1634.8007        | L    | <b>1727.9650</b> | <b>1710.9385</b> | 16 |
| 13 | 1680.8538        | 1663.8273 | <b>1708.8487</b> | 1691.8222        | G    | <b>1614.8810</b> | 1597.8544        | 15 |
| 14 | <b>1793.9379</b> | 1776.9113 | <b>1821.9328</b> | 1804.9062        | L    | 1557.8595        | 1540.8329        | 14 |
| 15 | 1907.0219        | 1889.9954 | <b>1935.0168</b> | 1917.9903        | L    | <b>1444.7754</b> | <b>1427.7489</b> | 13 |
| 16 | 1994.0540        | 1977.0274 | 2022.0489        | 2005.0223        | S    | <b>1331.6914</b> | <b>1314.6648</b> | 12 |
| 17 | 2123.0966        | 2106.0700 | 2151.0915        | 2134.0649        | E    | <b>1244.6593</b> | <b>1227.6328</b> | 11 |
| 18 | 2180.1180        | 2163.0915 | 2208.1129        | 2191.0864        | G    | <b>1115.6167</b> | <b>1098.5902</b> | 10 |
| 19 | 2293.2021        | 2276.1755 | 2321.1970        | 2304.1704        | L    | <b>1058.5953</b> | <b>1041.5687</b> | 9  |
| 20 | 2394.2498        | 2377.2232 | 2422.2447        | 2405.2181        | T    | <b>945.5112</b>  | 928.4847         | 8  |
| 21 | 2508.2927        | 2491.2661 | 2536.2876        | 2519.2611        | N    | <b>844.4635</b>  | <b>827.4370</b>  | 7  |
| 22 | 2636.3876        | 2619.3611 | 2664.3826        | 2647.3560        | K    | <b>730.4206</b>  | <b>713.3941</b>  | 6  |
| 23 | 2764.4462        | 2747.4197 | 2792.4411        | 2775.4146        | Q    | <b>602.3257</b>  | <b>585.2991</b>  | 5  |
| 24 | 2877.5303        | 2860.5037 | 2905.5252        | 2888.4987        | I    | <b>474.2671</b>  | 457.2405         | 4  |
| 25 | 2948.5674        | 2931.5409 | 2976.5623        | 2959.5358        | A    | <b>361.1830</b>  | <b>344.1565</b>  | 3  |
| 26 | 3063.5943        | 3046.5678 | 3091.5893        | 3074.5627        | D    | 290.1459         | 273.1193         | 2  |
| 27 |                  |           |                  |                  | R    | 175.1190         | 158.0924         | 1  |

# Probable chaperone protein DnaK (heat shock 70 kDa protein) (Rv0350) Modification: Hex

File Statistics Tools  
Control Follow up Result Browser

Spec FDR: 37 / 31498 = 0.12% Pep FDR: 20 / 16716 = 0.12% Prot FDR: 15 / 1515 = 0.99% # Prot (Max Parsimony): 1494 Unique Prot: 1494 Unlabeled Decoys: 0 / 0

View mode:  Proteins  Proteins Max Pars  Peptides  Scans

| Locus | Group  | GroupType | Length | #UniquePeptides | MolWt | SequenceCount | SpectrumCount | NSAF | Coverage            | Protein Score | Description |                                                                                                    |
|-------|--------|-----------|--------|-----------------|-------|---------------|---------------|------|---------------------|---------------|-------------|----------------------------------------------------------------------------------------------------|
| 1     | P9WMJ9 | 390       | Unique | 625             | 98    | 66772.3       | 98            | 488  | 0.00748752008761512 | 0.8992        | 1509.3163   | Chaperone protein DnaK OS=Mycobacterium tuberculosis (strain ATCC 25618 / H37Rv) GN=dnaK PE=1 SV=1 |

| File Name                  | Scan No | Z | Unique | MeasuredMH  | TheoreticalMH | PPM      | PrimaryScore | SecondaryScore   | DeltaCN | PeaksMatched | BayesianScore | PeptideSequence                             |
|----------------------------|---------|---|--------|-------------|---------------|----------|--------------|------------------|---------|--------------|---------------|---------------------------------------------|
| 60 171213_PT_H37Rv_2-2.sqt | 25666   | 3 | True   | 2461.292053 | 2461.297318   | -2.13912 | 3.4778       | 13.9803852011545 | 0.5712  | 27           | 0.85316       | N.LPYITVDADKNPLFLDEQLTRA                    |
| 61 171213_PT_H37Rv_2-2.sqt | 37067   | 3 | True   | 2998.528172 | 2998.53275    | -1.52675 | 2.8112       | 8.28608147045285 | 0.5301  | 29           | 0.85249       | R.AVGIDLGTNSVSVLEGGDPVWVANSEGSRT            |
| 62 171213_PT_H37Rv_2-2.sqt | 27075   | 4 | True   | 3909.032858 | 3907.033505   | -1.87949 | 4.6529       | 10.0519875608546 | 0.4877  | 46           | 0.85128       | K.AKIELSSQSTINLPYITVDADKNPLFLDEQLTRA        |
| 63 171213_PT_H37Rv_2-2.sqt | 26709   | 3 | True   | 2999.540928 | 2998.53275    | 1.60958  | 3.6122       | 10.854054620534  | 0.5095  | 32           | 0.85102       | R.AVGIDLGTNSVSVLEGGDPVWVANSEGSRT            |
| 64 171213_PT_H37Rv_2-2.sqt | 26909   | 4 | True   | 4271.256491 | 4269.247355   | 0.57032  | 4.1619       | 7.86226722367649 | 0.3927  | 44           | 0.85067       | M.ARAVGIDLGTNSVSVLEGGDPVWVANSEGRTPPSIVAFARN |
| 65 171213_PT_H37Rv_2-2.sqt | 12707   | 4 | True   | 3199.433737 | 3198.431867   | -0.46258 | 5.0243       | 16.3500277083056 | 0.5868  | 43           | 0.85065       | A.SQATGAHPGGEPGAHPGSAADDVDAEVDVDDGR E       |
| 66 171213_PT_H37Rv_2-2.sqt | 17730   | 3 | True   | 2636.184055 | 2635.174016   | 2.53738  | 3.0236       | 6.57845153183954 | 0.3888  | 21           | 0.84933       | F.TT(+486.158400)ADDNQPSVQIQVYQGER.E        |

MS/MS Fragmentation of **TTADDNQPSVEIQVYQGER**  
Found in **CND86259.1** in **NCBIprot**, Chaperone protein DnaK (Hsp 70) [Mycobacterium tuberculosis]

Match to Query 2: 2635.176779 from(2636.184055,1+) index(0)  
Data file scans dnaK Hex-Hex-Hex Mascot.txt

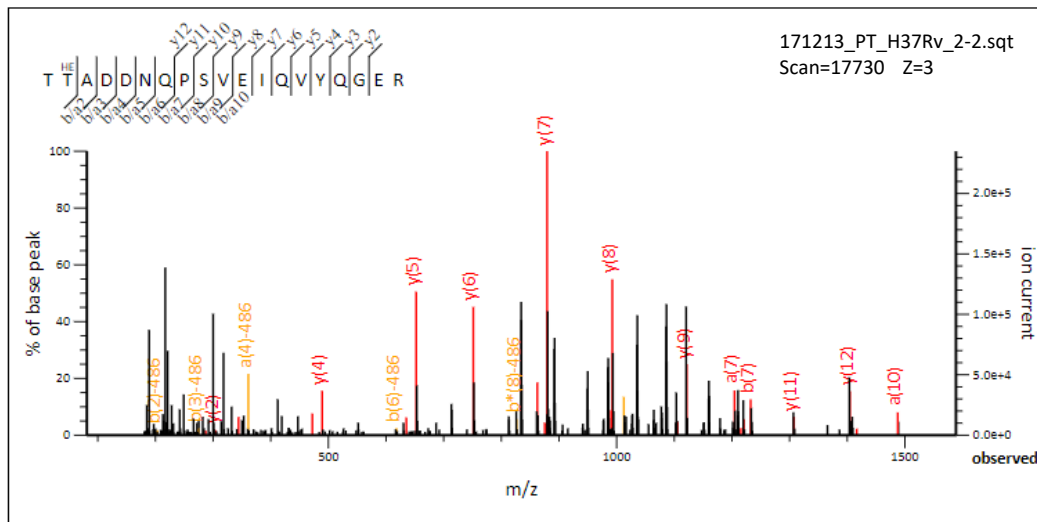

| #  | a         | a*        | b         | b*        | Seq. | y         | y*        | #  |
|----|-----------|-----------|-----------|-----------|------|-----------|-----------|----|
| 1  | 74.0600   |           | 102.0550  |           | T    |           |           | 19 |
| 2  | 661.2662  |           | 689.2611  |           | T    | 2535.1104 | 2518.0839 | 18 |
| 3  | 732.3033  |           | 760.2982  |           | A    | 1947.9043 | 1930.8777 | 17 |
| 4  | 847.3302  |           | 875.3252  |           | D    | 1876.8672 | 1859.8406 | 16 |
| 5  | 962.3572  |           | 990.3521  |           | D    | 1761.8402 | 1744.8137 | 15 |
| 6  | 1076.4001 | 1059.3736 | 1104.3950 | 1087.3685 | N    | 1646.8133 | 1629.7867 | 14 |
| 7  | 1204.4587 | 1187.4321 | 1232.4536 | 1215.4271 | Q    | 1532.7703 | 1515.7438 | 13 |
| 8  | 1301.5115 | 1284.4849 | 1329.5064 | 1312.4798 | P    | 1404.7118 | 1387.6852 | 12 |
| 9  | 1388.5435 | 1371.5169 | 1416.5384 | 1399.5119 | S    | 1307.6590 | 1290.6325 | 11 |
| 10 | 1487.6119 | 1470.5854 | 1515.6068 | 1498.5803 | V    | 1220.6270 | 1203.6004 | 10 |
| 11 | 1616.6545 | 1599.6279 | 1644.6494 | 1627.6229 | E    | 1121.5586 | 1104.5320 | 9  |
| 12 | 1729.7386 | 1712.7120 | 1757.7335 | 1740.7069 | I    | 992.5160  | 975.4894  | 8  |
| 13 | 1857.7971 | 1840.7706 | 1885.7921 | 1868.7655 | Q    | 879.4319  | 862.4054  | 7  |
| 14 | 1956.8656 | 1939.8390 | 1984.8605 | 1967.8339 | V    | 751.3733  | 734.3468  | 6  |
| 15 | 2119.9289 | 2102.9023 | 2147.9238 | 2130.8972 | Y    | 652.3049  | 635.2784  | 5  |
| 16 | 2247.9875 | 2230.9609 | 2275.9824 | 2258.9558 | Q    | 489.2416  | 472.2150  | 4  |
| 17 | 2305.0089 | 2287.9824 | 2333.0038 | 2315.9773 | G    | 361.1830  | 344.1565  | 3  |
| 18 | 2434.0515 | 2417.0250 | 2462.0464 | 2445.0199 | E    | 304.1615  | 287.1350  | 2  |
| 19 |           |           |           |           | R    | 175.1190  | 158.0924  | 1  |

# Probable transmembrane carbonic anhydrase Rv3273 (Rv3273)

## Modification: Hex-Hex-Hex

Filter :: Search Engine Processor (SEPro - for PSMs)

File Statistics Tools  
Control Follow up Result Browser

Spec FDR: 49 / 36000 = 0.14% Pep FDR: 24 / 17635 = 0.14% Prot FDR: 15 / 1505 = 1% # Prot (Max Parsimony): 1487 Unique Prot: 1482 Unlabeled Decoys: 0 / 0

View mode: Proteins Proteins Max Pars Peptides Scans Rv3273

| GroupType | Length | #UniquePeptides | MolWt   | SequenceCount | SpectrumCount | NSAF                 | Coverage | Protein Score | Description                                                                                                                                                            |
|-----------|--------|-----------------|---------|---------------|---------------|----------------------|----------|---------------|------------------------------------------------------------------------------------------------------------------------------------------------------------------------|
| 1 Unique  | 764    | 7               | 80497.1 | 7             | 11            | 0.000123414288781237 | 0.1728   | 30.9285       | Probable transmembrane carbonic anhydrase (Carbonate dehydratase) (Carbonic dehydratase) OS=Mycobacterium tuberculosis (strain ATCC 25618 / H37Rv) GN=Rv3273 PE=1 SV=2 |

| File Name               | Scan No | Z | Unique | MeasuredMH  | TheoreticalMH | PPM      | PrimaryScore | SecondaryScore     | DeltaCN | PeaksMatched | BayesianScore | PeptideSequence                             |
|-------------------------|---------|---|--------|-------------|---------------|----------|--------------|--------------------|---------|--------------|---------------|---------------------------------------------|
| 171213_PT_H37Rv_1-4.sqt | 16134   | 3 | True   | 2865.310154 | 2864.31556    | -3.05586 | 3.2453       | 9.98036859687209   | 0.5101  | 27           | 0.8811        | R.VYEVGPNIGICPDEADRPVDHESQA-                |
| 171213_PT_H37Rv_1-4.sqt | 24164   | 3 | True   | 2532.257916 | 2532.257638   | 0.10978  | 3.9406       | 16.5785450673992   | 0.5792  | 28           | 0.62509       | R.SAESAGYPEADQLSIVNVAQVER.L                 |
| 171213_PT_H37Rv_1-4.sqt | 22480   | 2 | True   | 1886.034742 | 1886.03819    | -1.82617 | 2.9223       | 9.38827158046884   | 0.5969  | 22           | 0.60742       | R.ILPNVITASGPGDLYTVR.N                      |
| 171213_PT_H37Rv_1-4.sqt | 24195   | 2 | True   | 2534.260058 | 2532.257638   | -1.68886 | 3.085        | 11.5444161320616   | 0.5075  | 20           | 0.53697       | R.SAESAGYPEADQLSIVNVAQVER.L                 |
| 171213_PT_H37Rv_1-4.sqt | 16911   | 2 | True   | 1425.693385 | 1425.696848   | -2.42899 | 2.6798       | 7.55592909389935   | 0.4837  | 16           | 0.52171       | R.NLGNLVPTDPDDR.S                           |
| 171213_PT_H37Rv_1-1.sqt | 44996   | 3 | True   | 2526.548924 | 2525.542908   | 1.05519  | 1.7869       | 1.45243416362444   | 0.3143  | 19           | 0.41375       | R.IIPGPLVAIAGATVLLALLPVLTQTER.I             |
| 171213_PT_H37Rv_1-6.sqt | 17951   | 4 | True   | 3196.626557 | 3196.651064   | -7.66652 | 2.9672       | 1.22077992264232   | 0.2011  | 31           | 0.37945       | R.HPILATAVAAADLQVIGIFFDIST(+486.158400)AR.V |
| 171213_PT_H37Rv_1-5.sqt | 19314   | 4 | True   | 3196.630365 | 3196.651064   | -6.47526 | 2.9064       | -0.22314355131421  | 0.1369  | 30           | 0.37126       | R.HPILATAVAAADLQVIGIFFDIST(+486.158400)AR.V |
| 171213_PT_H37Rv_1-3.sqt | 23086   | 4 | True   | 3196.630882 | 3196.651064   | -6.31352 | 2.7563       | -0.139761942375159 | 0.0895  | 30           | 0.36972       | R.HPILATAVAAADLQVIGIFFDIST(+486.158400)AR.V |
| 171213_PT_H37Rv_1-2.sqt | 23433   | 4 | True   | 3196.629441 | 3196.651064   | -6.76431 | 2.619        | -1.03673688495002  | 0.0557  | 29           | 0.3633        | R.HPILATAVAAADLQVIGIFFDIST(+486.158400)AR.V |
| 171213_PT_H37Rv_1-4.sqt | 25248   | 2 | True   | 1358.722826 | 1357.726298   | -5.02089 | 2.0197       | 3.04282388108784   | 0.3802  | 13           | 0.86206       | H.FASDPIGLVPWR.S                            |

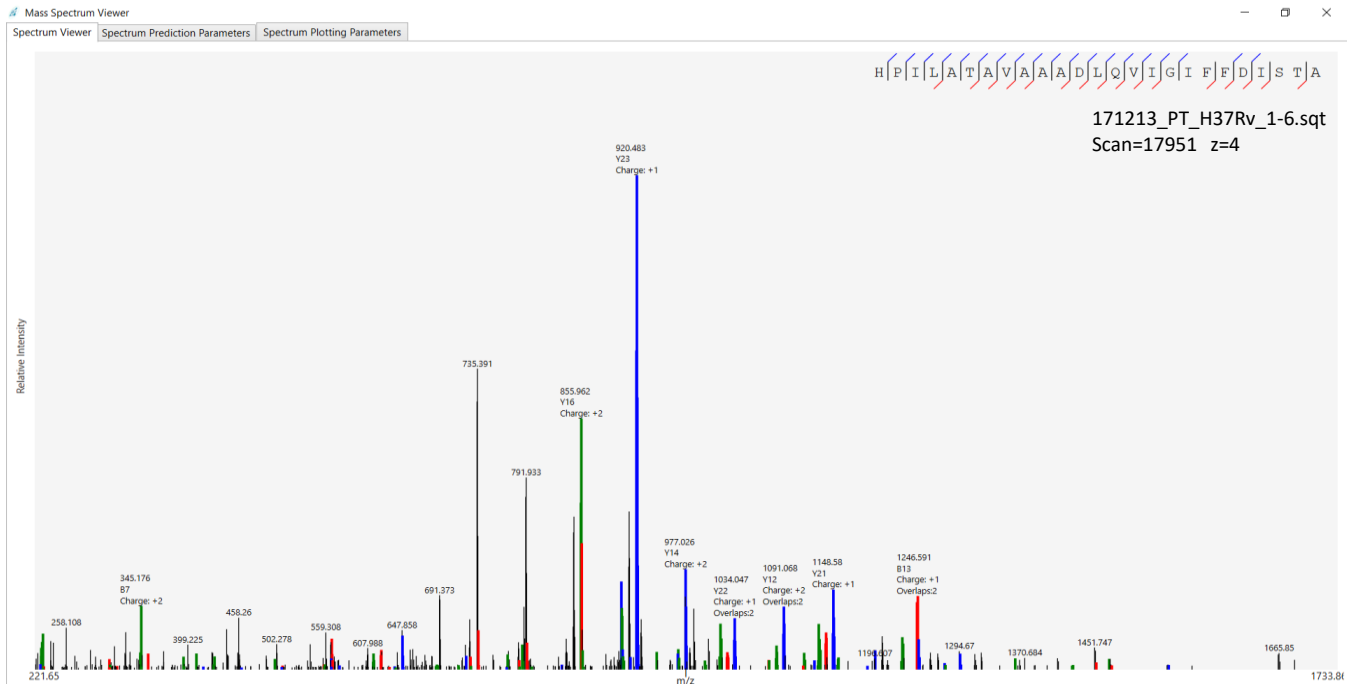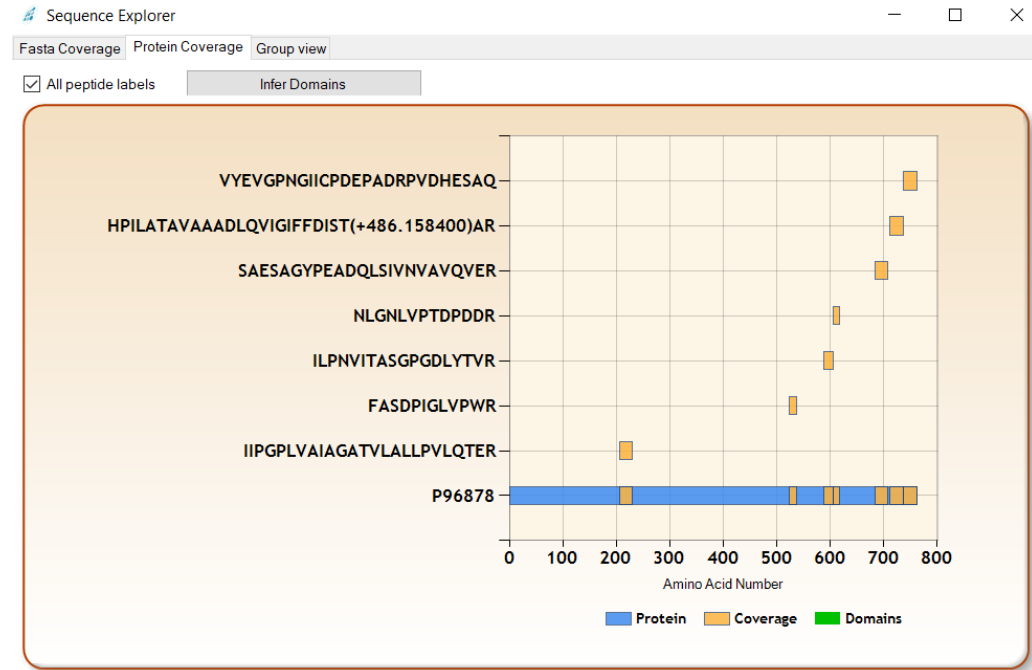

# Probable isocitrate dehydrogenase [NADP] Icd2 (Rv0066c)

## Modification: Hex-Hex-Hex

| File                                                                                                                                                                               | Statistics | Tools     |        |                 |         |               |               |                     |          |               |                                                                                                      |
|------------------------------------------------------------------------------------------------------------------------------------------------------------------------------------|------------|-----------|--------|-----------------|---------|---------------|---------------|---------------------|----------|---------------|------------------------------------------------------------------------------------------------------|
| Control Follow up Result Browser                                                                                                                                                   |            |           |        |                 |         |               |               |                     |          |               |                                                                                                      |
| Spec FDR: 49 / 36000 = 0.14% Pep FDR: 24 / 17635 = 0.14% Prot FDR: 15 / 1505 = 1% # Prot (Max Parsimony): 1487 Unique Prot: 1482 Unlabeled Decoys: 0 / 0                           |            |           |        |                 |         |               |               |                     |          |               |                                                                                                      |
| View mode: <input checked="" type="radio"/> Proteins <input type="radio"/> Proteins Max Pars <input type="radio"/> Peptides <input type="radio"/> Scans <input type="radio"/> Icd2 |            |           |        |                 |         |               |               |                     |          |               |                                                                                                      |
| Locus                                                                                                                                                                              | Group      | GroupType | Length | #UniquePeptides | MolWt   | SequenceCount | SpectrumCount | NSAF                | Coverage | Protein Score | Description                                                                                          |
| 1_053611                                                                                                                                                                           | 2          | Unique    | 745    | 70              | 82479.6 | 70            | 143           | 0.00164530297473188 | 0.8148   | 426.9556      | isocitrate dehydrogenase OS=Mycobacterium tuberculosis (strain ATCC 25618 / H37Rv) GN=icd2 PE=1 SV=1 |

  

| File Name               | Scan No | Z | Unique | MeasuredMH  | TheoreticalMH | PPM       | PrimaryScore | SecondaryScore     | DeltaCN | PeaksMatched | BayesianScore | PeptideSequence             |
|-------------------------|---------|---|--------|-------------|---------------|-----------|--------------|--------------------|---------|--------------|---------------|-----------------------------|
| 171213_PT_H37Rv_1-1.sqt | 9824    | 3 | True   | 1640.739505 | 1640.742041   | -1.54564  | 2.5435       | 6.3367757323964    | 0.4812  | 26           | 0.52035       | R.KHPHSMGEWMSMASR.T         |
| 171213_PT_H37Rv_1-1.sqt | 9850    | 4 | True   | 1807.829272 | 1807.832643   | -1.86467  | 2.8478       | 3.5648934743295    | 0.3102  | 26           | 0.40338       | R.CHEHRPELAMVDSAR.G         |
| 171213_PT_H37Rv_1-1.sqt | 9853    | 2 | True   | 1640.741747 | 1640.742041   | -0.17919  | 2.3621       | 11.45465656568463  | 0.6184  | 16           | 0.60275       | R.KHPHSMGEWMSMASR.T         |
| 171213_PT_H37Rv_1-1.sqt | 9877    | 4 | True   | 1640.739068 | 1640.742041   | -1.81199  | 1.8825       | 0.0747235461959364 | 0.2233  | 24           | 0.37579       | R.KHPHSMGEWMSMASR.T         |
| 171213_PT_H37Rv_1-3.sqt | 10270   | 2 | True   | 1632.744163 | 1630.754078   | -10.17612 | 1.6712       | -1.30251275218084  | 0.0955  | 9            | 0.30473       | K.LLDNDKSPS(+486.158400)R.K |
| 171213_PT_H37Rv_1-2.sqt | 10328   | 2 | True   | 1632.745375 | 1630.754078   | -9.4339   | 1.9178       | 0.619896718820353  | 0.1459  | 11           | 0.30923       | K.LLDNDKSPS(+486.158400)R.K |
| 171213_PT_H37Rv_1-2.sqt | 10354   | 2 | True   | 788.450629  | 788.451245    | -0.78128  | 1.3248       | -2.00821403239147  | 0.1581  | 9            | 0.3438        | K.TLDAAGK.L                 |
| 171213_PT_H37Rv_1-1.sqt | 10652   | 2 | True   | 789.452379  | 788.451245    | -2.80701  | 1.6396       | 1.8578992717326    | 0.2814  | 9            | 0.38279       | K.TLDAAGK.L                 |
| 171213_PT_H37Rv_1-1.sqt | 10681   | 2 | True   | 788.450497  | 788.451245    | -0.9487   | 1.4266       | 0.202116184122134  | 0.2568  | 9            | 0.35368       | K.TLDAAGK.L                 |
| 171213_PT_H37Rv_1-2.sqt | 11345   | 4 | True   | 1318.734525 | 1318.737866   | -2.53349  | 2.2022       | 2.44992568089275   | 0.2692  | 26           | 0.41477       | K.VSHPIVFGHAVR.I            |
| 171213_PT_H37Rv_1-1.sqt | 11452   | 4 | True   | 1318.734595 | 1318.737866   | -2.40041  | 2.4445       | 3.11226608980994   | 0.3324  | 26           | 0.4476        | K.VSHPIVFGHAVR.I            |
| 171213_PT_H37Rv_1-1.sqt | 11463   | 3 | True   | 1318.736951 | 1318.737866   | -0.69385  | 2.637        | 6.05333995082607   | 0.4563  | 20           | 0.51641       | K.VSHPIVFGHAVR.I            |
| 171213_PT_H37Rv_1-1.sqt | 11557   | 2 | True   | 1318.735295 | 1318.737866   | -1.9496   | 2.2498       | 4.6831317274578    | 0.3506  | 11           | 0.4507        | K.VSHPIVFGHAVR.I            |
| 171213_PT_H37Rv_1-1.sqt | 12496   | 2 | True   | 1107.542331 | 1107.542914   | -0.52639  | 2.3404       | 8.73410619297981   | 0.5606  | 12           | 0.58235       | K.AVNPSTFSR.I               |

### Mass Spectrum Viewer

Spectrum Viewer Spectrum Prediction Parameters Spectrum Plotting Parameters

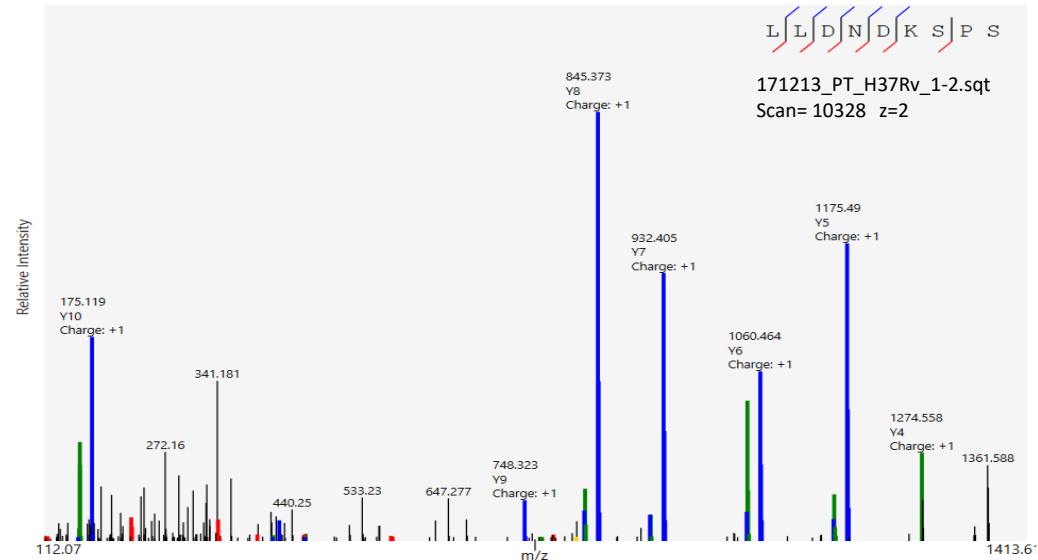

### Sequence Explorer

Fasta Coverage Protein Coverage Group view

All peptide labels  Infer Domains

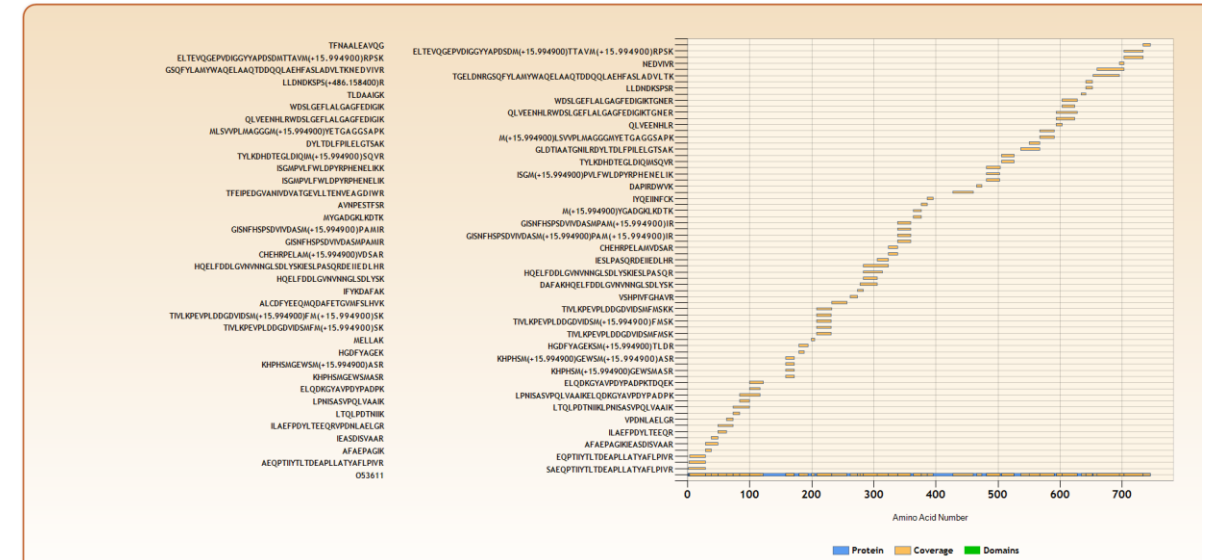



# ESAT-6 like protein EsxC (Rv3890c) Modification: Hex

| File Name               | Scan No | Z | Unique | MeasuredMH  | TheoreticalMH | PPM      | PrimaryScore | SecondaryScore   | DeltaCN | PeaksMatched | BayesianScore | PeptideSequence                             |
|-------------------------|---------|---|--------|-------------|---------------|----------|--------------|------------------|---------|--------------|---------------|---------------------------------------------|
| 171213_PT_H37Rv_2-6.sqt | 15515   | 2 | True   | 2186.00048  | 2185.999632   | 0.1903   | 3.4083       | 11.9813303728523 | 0.5915  | 20           | 0.76328       | M.SDQITYNPGAVSDFASDVGSRA                    |
| 171213_PT_H37Rv_2-6.sqt | 15526   | 3 | True   | 2185.998203 | 2185.999632   | -0.65371 | 2.705        | 6.48248754357779 | 0.5006  | 25           | 0.74421       | M.SDQITYNPGAVSDFASDVGSRA                    |
| 171218_PT_H37Rv_2-4.sqt | 4270    | 3 | True   | 1741.790379 | 1741.794893   | -2.59159 | 2.2142       | 2.59160138845896 | 0.3148  | 15           | 0.33938       | R.AGQLHM(+15.994900)IYEDTAS(+162.052824)K.T |
| 171213_PT_H37Rv_2-1.sqt | 4565    | 3 | True   | 1741.789708 | 1741.794893   | -2.97682 | 2.1344       | 2.57046453814965 | 0.2736  | 15           | 0.3278        | R.AGQLHM(+15.994900)IYEDTAS(+162.052824)K.T |

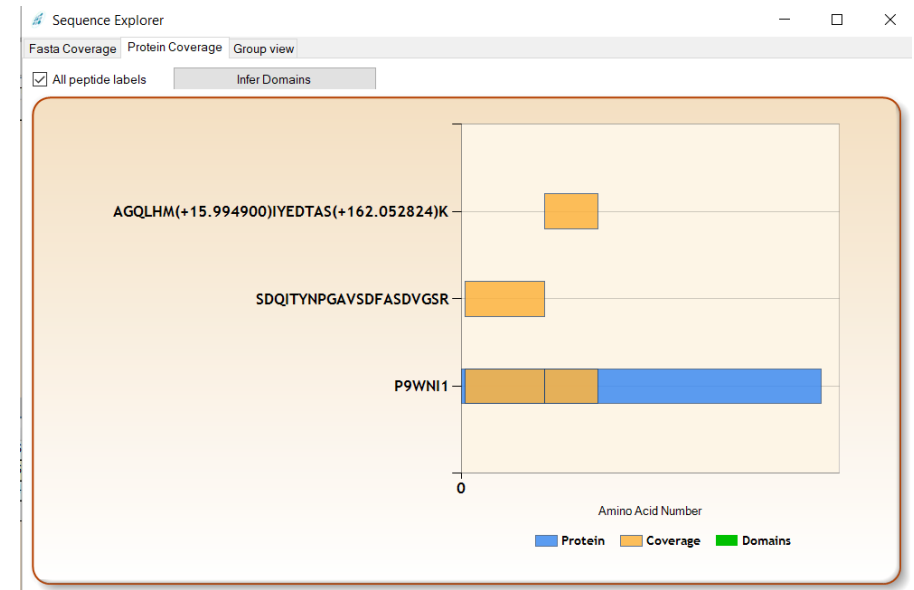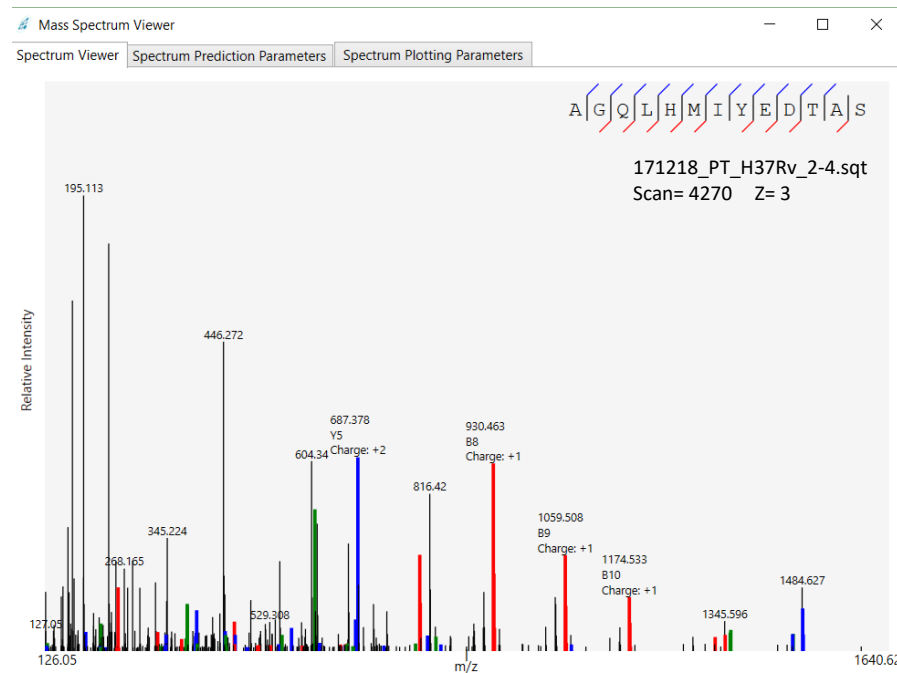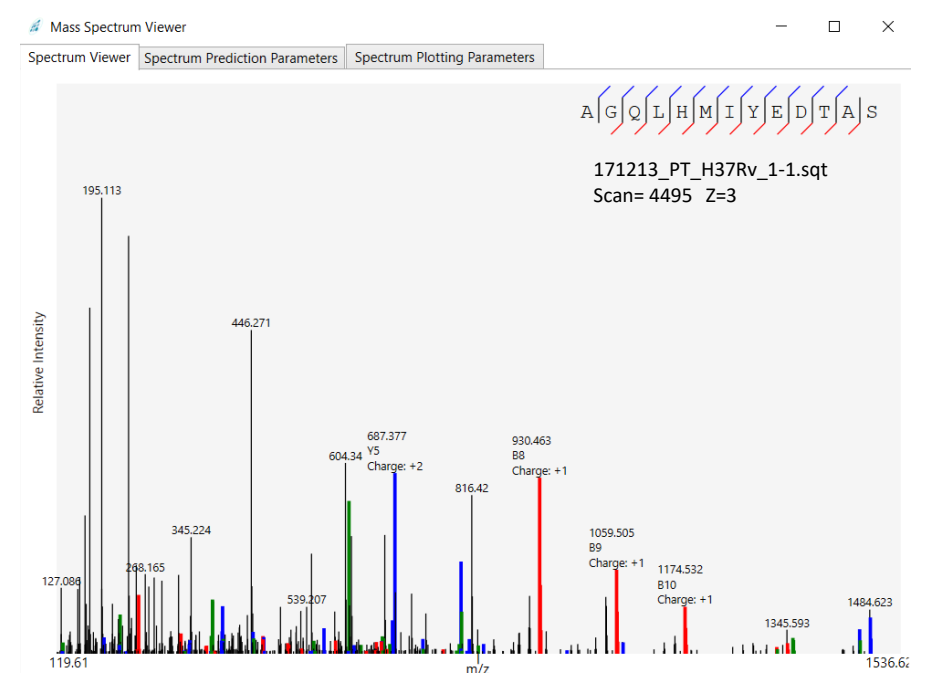

# Probable adenosylhomocysteinase SahH (AhcY) (Rv3248c)

## Modification: Hex

File Statistics Tools  
Control Follow up Result Browser

Spec FDR: 37 / 31147 = 0.12% Pep FDR: 22 / 16603 = 0.13% Prot FDR: 15 / 1509 = 0.99% # Prot (Max Parsimony): 1488 Unique Prot: 1486 Unlabeled Decoys: 0 / 0

View mode:  Proteins  Proteins Max Pars  Peptides  Scans  Ahc

| pepctumCount | NSAF                | Coverage | Protein Score | Description                                                                                        |
|--------------|---------------------|----------|---------------|----------------------------------------------------------------------------------------------------|
| 17           | 0.00286976490106402 | 0.7576   | 429.7266      | Adenosylhomocysteinase OS=Mycobacterium tuberculosis (strain ATCC 25618 / H37Rv) GN=ahcY PE=1 SV=1 |

  

| File Name               | Scan No | Z | Unique | MeasuredMH  | TheoreticalMH | PPM      | PrimaryScore | SecondaryScore    | DeltaCN | PeaksMatched | BayesianScore | PeptideSequence                         |
|-------------------------|---------|---|--------|-------------|---------------|----------|--------------|-------------------|---------|--------------|---------------|-----------------------------------------|
| 171213_PT_H37Rv_2-2.sqt | 19852   | 3 | True   | 1703.942395 | 1703.943895   | -0.88031 | 2.5693       | 2.23492644452023  | 0.2307  | 21           | 0.34125       | K.IADLSLADFGRKELR I                     |
| 171213_PT_H37Rv_2-2.sqt | 15132   | 3 | True   | 1890.016683 | 1890.017848   | -0.6164  | 4.6398       | 13.7478519094905  | 0.5602  | 29           | 0.63567       | K.IAESVKGVTTEITTVGLRL                   |
| 171213_PT_H37Rv_2-2.sqt | 15704   | 3 | True   | 1890.019932 | 1890.017848   | 1.10263  | 3.9995       | 11.0682396437088  | 0.4863  | 30           | 0.55449       | K.IAESVKGVTTEITTVGLRL                   |
| 171213_PT_H37Rv_2-2.sqt | 15158   | 2 | True   | 1890.016343 | 1890.017848   | -0.79629 | 3.8123       | 9.25533773790692  | 0.4951  | 24           | 0.53721       | K.IAESVKGVTTEITTVGLRL                   |
| 171213_PT_H37Rv_2-2.sqt | 13411   | 3 | True   | 1308.696873 | 1308.698031   | -0.88485 | 2.7638       | 8.97132347150568  | 0.4936  | 23           | 0.52891       | K.KVLCYGVGVGK G                         |
| 171213_PT_H37Rv_2-2.sqt | 17188   | 3 | True   | 2870.396264 | 2869.389046   | 1.34755  | 2.1728       | 0.715392789507265 | 0.1657  | 24           | 0.33857       | K.LT(+162_052824)KEQAEVLGVVDEGPKPDHYR.Y |
| 171213_PT_H37Rv_2-2.sqt | 17161   | 4 | True   | 2870.398478 | 2869.389046   | 2.11887  | 2.8529       | 2.6200393237795   | 0.2192  | 34           | 0.34759       | K.LT(+162_052824)KEQAEVLGVVDEGPKPDHYR.Y |
| 171213_PT_H37Rv_2-2.sqt | 14930   | 3 | True   | 1654.771344 | 1654.770742   | 0.3638   | 3.1164       | 6.87819647674059  | 0.431   | 19           | 0.48468       | K.NDEYDVEYRLPK.H                        |

### Mass Spectrum Viewer

Spectrum Viewer Spectrum Prediction Parameters Spectrum Plotting Parameters

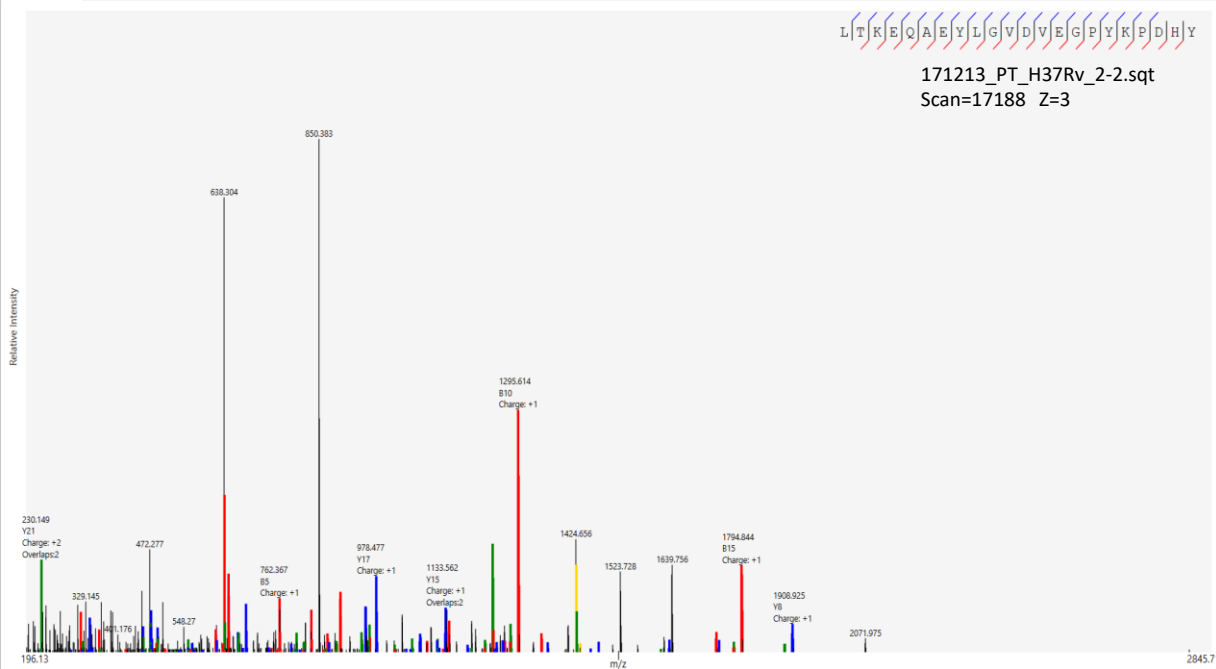

### Sequence Explorer

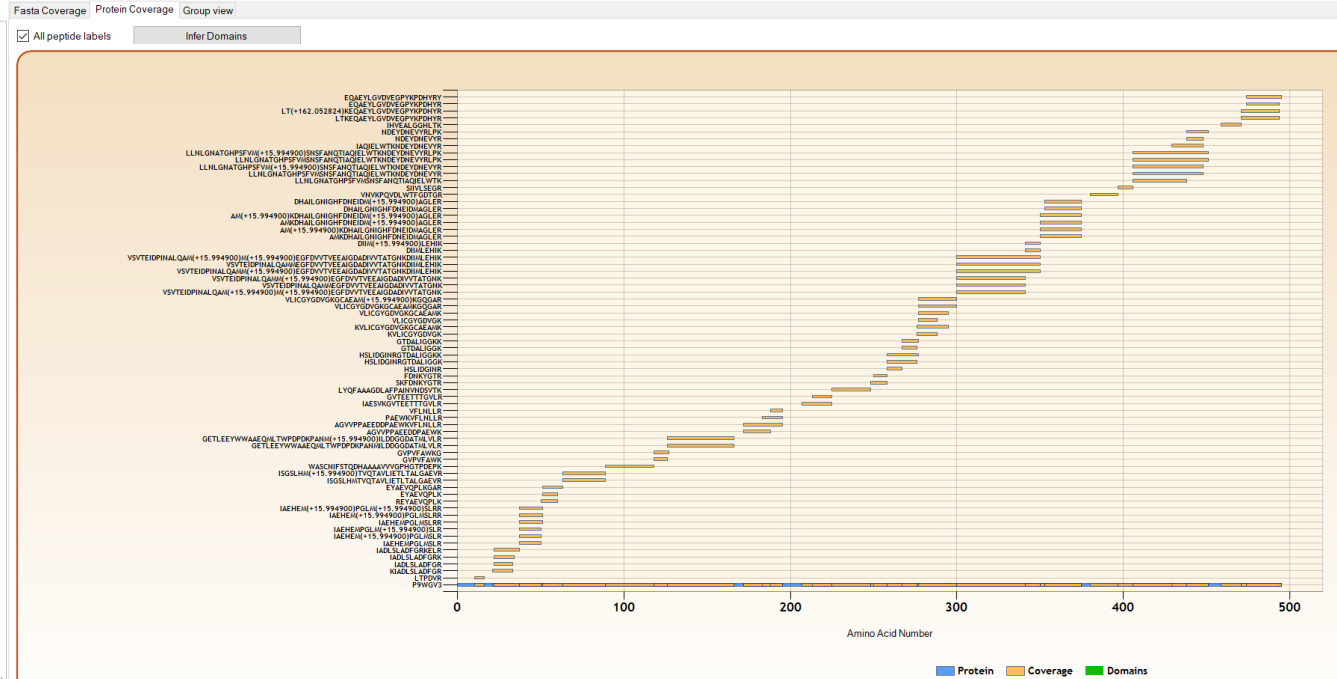

# Probable cold-shock DeaD-box protein A homolog DeaD (Rv1253) Modification: Hex

| File Name               | Scan No | Z | Unique | MeasuredMH  | TheoreticalMH | PPM      | PrimaryScore | SecondaryScore    | DeltaCN | PeaksMatched | BayesianScore | PeptideSequence                       |
|-------------------------|---------|---|--------|-------------|---------------|----------|--------------|-------------------|---------|--------------|---------------|---------------------------------------|
| 171213_PT_H37Rv_2-2.sqt | 26209   | 3 | True   | 2260.216892 | 2260.203083   | 6.10959  | 3.6222       | 9.04482593349861  | 0.4626  | 29           | 0.73782       | T.IT(+162.052824)ALRDGDIDILVATDVAAR.G |
| 171213_PT_H37Rv_2-1.sqt | 27626   | 3 | True   | 2261.225071 | 2260.203083   | 8.24243  | 3.1385       | 7.3697907385787   | 0.4117  | 23           | 0.71018       | T.IT(+162.052824)ALRDGDIDILVATDVAAR.G |
| 171213_PT_H37Rv_2-2.sqt | 11311   | 2 | True   | 1181.564388 | 1180.557955   | 2.60925  | 1.7886       | 0.805196684368568 | 0.2194  | 11           | 0.3386        | K.QAT(+162.052824)EEIAEK.L            |
| 171213_PT_H37Rv_2-1.sqt | 11837   | 2 | True   | 1181.56621  | 1180.557955   | 4.15127  | 1.627        | -1.18172719537862 | 0.0711  | 11           | 0.31228       | K.QAT(+162.052824)EEIAEK.L            |
| 171213_PT_H37Rv_2-1.sqt | 14580   | 2 | True   | 1028.608446 | 1028.609871   | -1.38537 | 2.0285       | 0.959720289801491 | 0.3592  | 12           | 0.68362       | D.ILVATDVAAR.G                        |

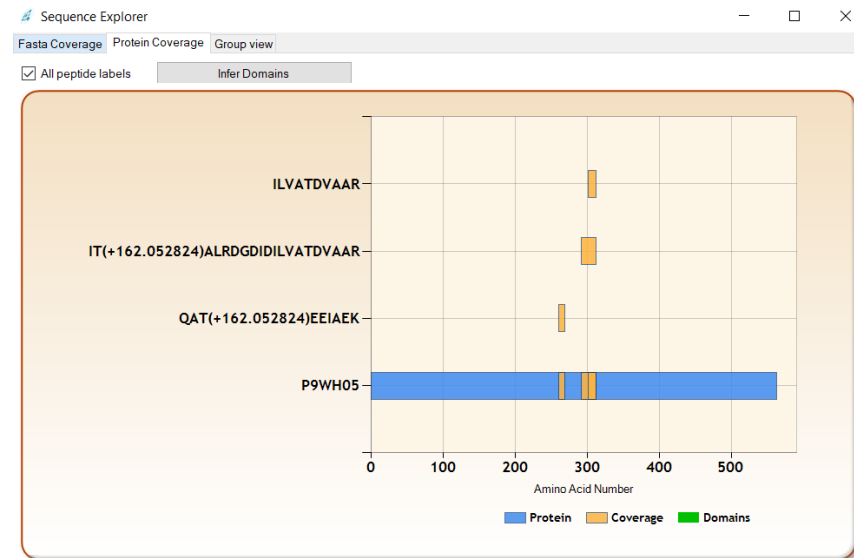

## MS/MS Fragmentation of **ITALRDGDIDILVATDVAAR**

Found in **CNW03826.1** in **NCBIprot**, cold-shock DEAD-box protein A [Mycobacterium tuberculosis]

Match to Query 2: 2259.209616 from(2260.216892,1+) index(1)

Data file scans DeaD Hex Mascot.txt

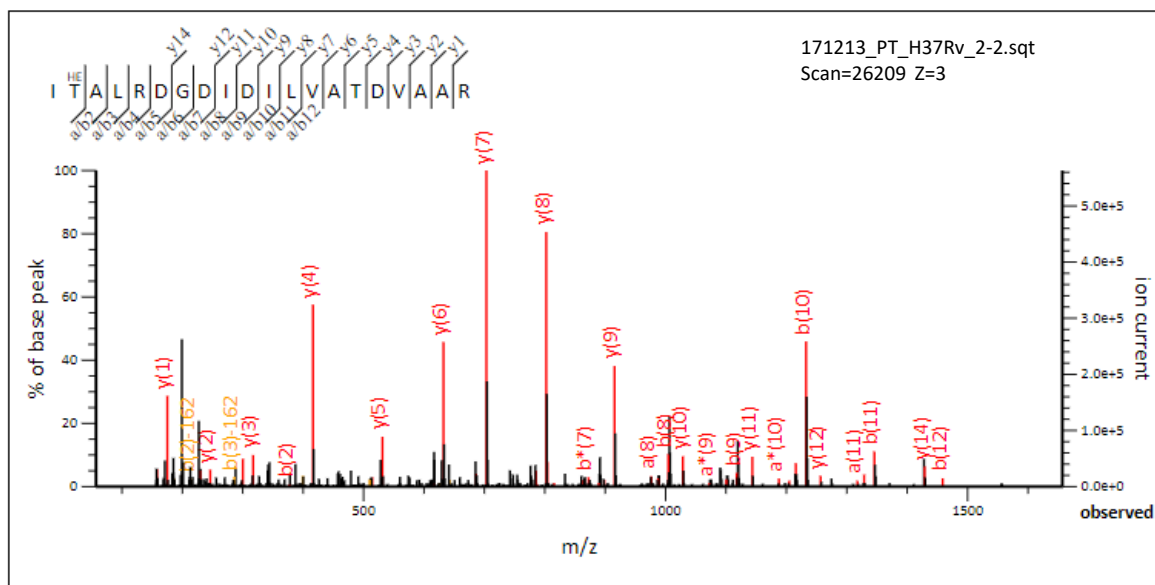

| #  | a         | a*        | b         | b*        | Seq. | y         | y*        | #  |
|----|-----------|-----------|-----------|-----------|------|-----------|-----------|----|
| 1  | 86.0964   |           | 114.0913  |           | I    |           |           | 20 |
| 2  | 349.1969  |           | 377.1918  |           | T    | 2147.1190 | 2130.0925 | 19 |
| 3  | 420.2340  |           | 448.2290  |           | A    | 1884.0185 | 1866.9920 | 18 |
| 4  | 533.3181  |           | 561.3130  |           | L    | 1812.9814 | 1795.9549 | 17 |
| 5  | 689.4192  | 672.3927  | 717.4141  | 700.3876  | R    | 1699.8973 | 1682.8708 | 16 |
| 6  | 804.4462  | 787.4196  | 832.4411  | 815.4145  | D    | 1543.7962 | 1526.7697 | 15 |
| 7  | 861.4676  | 844.4411  | 889.4625  | 872.4360  | G    | 1428.7693 | 1411.7427 | 14 |
| 8  | 976.4946  | 959.4680  | 1004.4895 | 987.4629  | D    | 1371.7478 | 1354.7213 | 13 |
| 9  | 1089.5786 | 1072.5521 | 1117.5735 | 1100.5470 | I    | 1256.7209 | 1239.6943 | 12 |
| 10 | 1204.6056 | 1187.5790 | 1232.6005 | 1215.5739 | D    | 1143.6368 | 1126.6103 | 11 |
| 11 | 1317.6896 | 1300.6631 | 1345.6846 | 1328.6580 | I    | 1028.6099 | 1011.5833 | 10 |
| 12 | 1430.7737 | 1413.7472 | 1458.7686 | 1441.7421 | L    | 915.5258  | 898.4993  | 9  |
| 13 | 1529.8421 | 1512.8156 | 1557.8370 | 1540.8105 | V    | 802.4417  | 785.4152  | 8  |
| 14 | 1600.8792 | 1583.8527 | 1628.8741 | 1611.8476 | A    | 703.3733  | 686.3468  | 7  |
| 15 | 1701.9269 | 1684.9004 | 1729.9218 | 1712.8953 | T    | 632.3362  | 615.3097  | 6  |
| 16 | 1816.9539 | 1799.9273 | 1844.9488 | 1827.9222 | D    | 531.2885  | 514.2620  | 5  |
| 17 | 1916.0223 | 1898.9957 | 1944.0172 | 1926.9906 | V    | 416.2616  | 399.2350  | 4  |
| 18 | 1987.0594 | 1970.0328 | 2015.0543 | 1998.0277 | A    | 317.1932  | 300.1666  | 3  |
| 19 | 2058.0965 | 2041.0699 | 2086.0914 | 2069.0649 | A    | 246.1561  | 229.1295  | 2  |
| 20 |           |           |           |           | R    | 175.1190  | 158.0924  | 1  |

# Probable polyketide synthase Pks5 (Rv1527C) Modification: Hex-Hex-Hex

File Statistics Tools  
Control Follow-up Result Browser

Spec FDR: 49 / 36000 = 0.14% Pep FDR: 24 / 17635 = 0.14% Prot FDR: 15 / 1505 = 1% # Prot (Max Parsimony): 1487 Unique Prot: 1482 Unlabeled Decoys: 0 / 0

View mode:  Proteins  Proteins Max Pars  Peptides  Scans  pks5

| Locus    | Group | GroupType | Length | #UniquePeptides | Mo/Wt    | SequenceCount | SpectrumCount | NSAF               | Coverage | Protein Score | Description                                                                                                                   |
|----------|-------|-----------|--------|-----------------|----------|---------------|---------------|--------------------|----------|---------------|-------------------------------------------------------------------------------------------------------------------------------|
| 1_053901 | 1399  | Some      | 2108   | 14              | 223731.9 | 21            | 24            | 9.759032254152E-05 | 0.1565   | 69.2663       | Mycoseroid acid synthase-like polyketide synthase OS=Mycobacterium tuberculosis (strain ATCC 25618 / H37Rv) GN=pks5 PE=1 SV=2 |

| File Name               | Scan No | Z | Unique | MeasuredMH  | TheoreticalMH | PPM      | PrimaryScore | SecondaryScore   | DeltaCN | PeaksMatched | BayesianScore | PeptideSequence                     |
|-------------------------|---------|---|--------|-------------|---------------|----------|--------------|------------------|---------|--------------|---------------|-------------------------------------|
| 171213_PT_H37Rv_1-1.sqt | 26484   | 3 | True   | 3202.624851 | 3201.617483   | 1.2546   | 3.9814       | 14.927208086181  | 0.588   | 30           | 0.62926       | R.LRDQLGTGGFTGVFVLTAPQTGDPDAESPVR.G |
| 171213_PT_H37Rv_1-1.sqt | 37697   | 3 | True   | 3168.669773 | 3166.678292   | -4.80296 | 4.4336       | 13.6585068091546 | 0.5782  | 34           | 0.60394       | R.LGPAFAGLVDAIEAGAGDTVLAENVLPGPLR.S |
| 171213_PT_H37Rv_1-1.sqt | 35476   | 2 | True   | 2334.233446 | 2333.234717   | -1.97966 | 3.5114       | 13.2731862671389 | 0.5838  | 20           | 0.61053       | R.DTAGYGDIVLNSVTGAAQLAGL.K          |
| 171213_PT_H37Rv_1-1.sqt | 32620   | 3 | True   | 2283.178318 | 2282.18156    | -2.8872  | 4.4933       | 12.833432085521  | 0.5772  | 34           | 0.62047       | R.ALAGDLYAAGAADFVLYPTGR.L           |
| 171213_PT_H37Rv_1-1.sqt | 32797   | 4 | True   | 3118.620749 | 3117.621506   | -1.31693 | 5.4759       | 12.3136578562101 | 0.5409  | 38           | 0.60693       | R.GVLHAAAVVEDATLANITDELIERDWAPKA    |
| 171213_PT_H37Rv_1-1.sqt | 25327   | 3 | False  | 1864.073914 | 1864.076307   | -1.28375 | 3.8732       | 10.9140889638815 | 0.5816  | 30           | 0.62143       | K.RLPDALADGDRILAVIR.G               |
| 171213_PT_H37Rv_1-1.sqt | 37624   | 3 | True   | 3167.68137  | 3166.678292   | -0.08587 | 4.2994       | 10.8606002789305 | 0.5488  | 36           | 0.59866       | R.LGPAFAGLVDAIEAGAGDTVLAENVLPGPLR.S |
| 171213_PT_H37Rv_1-1.sqt | 30620   | 2 | True   | 2457.251024 | 2456.245616   | 0.83752  | 4.0152       | 8.61701352669845 | 0.4888  | 24           | 0.54504       | R.LADWVDAQGPELAPADLAYTLAR.R         |
| 171213_PT_H37Rv_1-1.sqt | 32293   | 3 | True   | 2756.356175 | 2754.362103   | -4.58141 | 3.1139       | 8.44023215028011 | 0.4666  | 26           | 0.50612       | R.AIAFAEQTGDIAPEEGAYAFETLLR.H       |
| 171213_PT_H37Rv_1-1.sqt | 12190   | 2 | True   | 1374.693773 | 1374.697183   | -2.48055 | 2.2444       | 6.63772814176908 | 0.4112  | 11           | 0.41716       | R.GLQLGTGASQASER.A                  |
| 171213_PT_H37Rv_1-1.sqt | 33012   | 3 | True   | 2486.22855  | 2486.214365   | 5.70543  | 3.1085       | 6.53619172254965 | 0.3578  | 20           | 0.86098       | F.T(+486.158400)ELTPHLLTHAVDQTAR.S  |

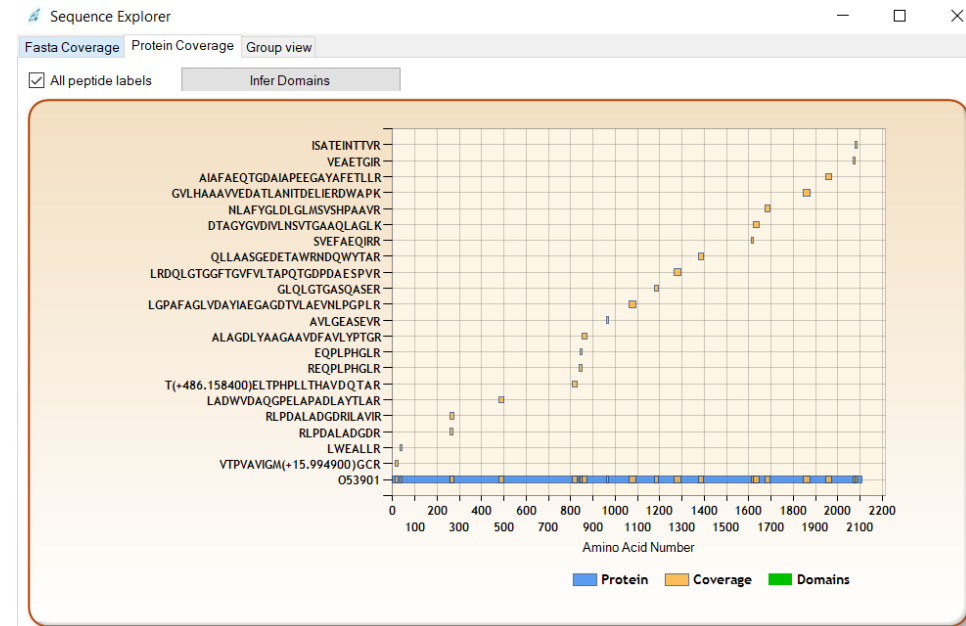

## MS/MS Fragmentation of TELTPHLLTHAVDQTAR

Found in **WP\_003901190.1** in **NCBIprot**, type I polyketide synthase [Mycobacterium tuberculosis]

Match to Query 1: 2485.221274 from(2486.228550,1+) index(1)

Data file scans pks5 Mascot.txt

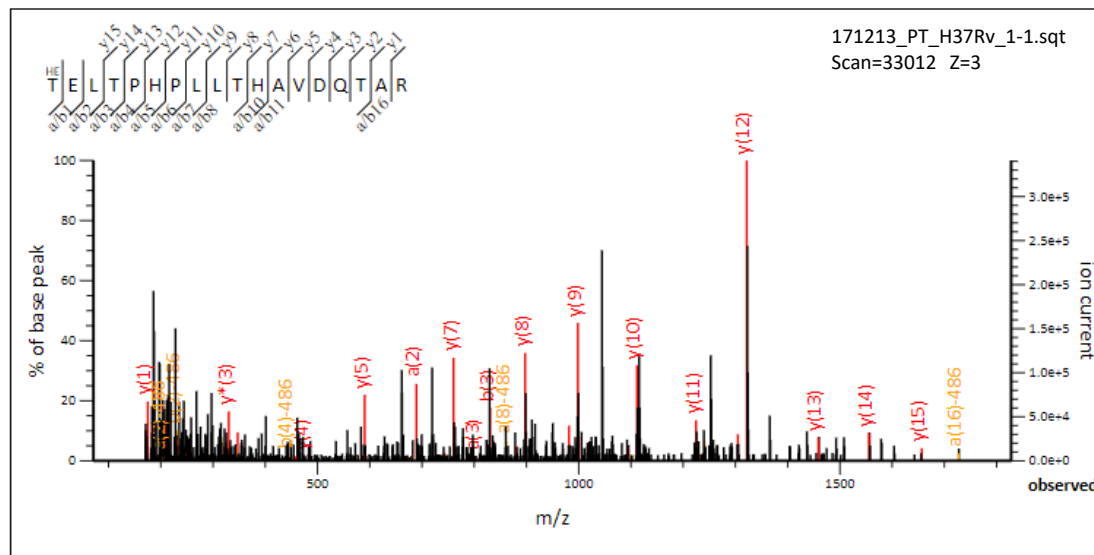

| #  | a         | a*        | b         | b*        | Seq. | y         | y*        | #  |
|----|-----------|-----------|-----------|-----------|------|-----------|-----------|----|
| 1  | 560.2185  |           | 588.2134  |           | T    |           |           | 18 |
| 2  | 689.2611  |           | 717.2560  |           | E    | 1899.0083 | 1881.9817 | 17 |
| 3  | 802.3452  |           | 830.3401  |           | L    | 1769.9657 | 1752.9391 | 16 |
| 4  | 903.3928  |           | 931.3878  |           | T    | 1656.8816 | 1639.8551 | 15 |
| 5  | 1000.4456 |           | 1028.4405 |           | P    | 1555.8340 | 1538.8074 | 14 |
| 6  | 1137.5045 |           | 1165.4994 |           | H    | 1458.7812 | 1441.7546 | 13 |
| 7  | 1234.5573 |           | 1262.5522 |           | P    | 1321.7223 | 1304.6957 | 12 |
| 8  | 1347.6414 |           | 1375.6363 |           | L    | 1224.6695 | 1207.6430 | 11 |
| 9  | 1460.7254 |           | 1488.7203 |           | L    | 1111.5854 | 1094.5589 | 10 |
| 10 | 1561.7731 |           | 1589.7680 |           | T    | 998.5014  | 981.4748  | 9  |
| 11 | 1698.8320 |           | 1726.8269 |           | H    | 897.4537  | 880.4272  | 8  |
| 12 | 1769.8691 |           | 1797.8640 |           | A    | 760.3948  | 743.3682  | 7  |
| 13 | 1868.9375 |           | 1896.9324 |           | V    | 689.3577  | 672.3311  | 6  |
| 14 | 1983.9645 |           | 2011.9594 |           | D    | 590.2893  | 573.2627  | 5  |
| 15 | 2112.0231 | 2094.9965 | 2140.0180 | 2122.9914 | Q    | 475.2623  | 458.2358  | 4  |
| 16 | 2213.0707 | 2196.0442 | 2241.0656 | 2224.0391 | T    | 347.2037  | 330.1772  | 3  |
| 17 | 2284.1078 | 2267.0813 | 2312.1028 | 2295.0762 | A    | 246.1561  | 229.1295  | 2  |
| 18 |           |           |           |           | R    | 175.1190  | 158.0924  | 1  |

# Diviva family protein Wag31 (Rv2145c)

## Modification: Hex

| File                                                                                                                                                                                       | Statistics | Tools          |        |                 |       |               |               |      |                     |               |             |                                                                                                                |
|--------------------------------------------------------------------------------------------------------------------------------------------------------------------------------------------|------------|----------------|--------|-----------------|-------|---------------|---------------|------|---------------------|---------------|-------------|----------------------------------------------------------------------------------------------------------------|
| Control                                                                                                                                                                                    | Follow up  | Result Browser |        |                 |       |               |               |      |                     |               |             |                                                                                                                |
| Spec FDR: 44 / 36033 = 0.12% Pep FDR: 27 / 17879 = 0.15% Prot FDR: 14 / 1494 = 0.94% # Prot (Max Parsimony): 1474 Unique Prot: 1473 Unlabeled Decoys: 0 / 0                                |            |                |        |                 |       |               |               |      |                     |               |             |                                                                                                                |
| View mode: <input checked="" type="radio"/> Proteins <input type="radio"/> Proteins Max Pars <input type="radio"/> Peptides <input type="radio"/> Scans <input type="text" value="wag31"/> |            |                |        |                 |       |               |               |      |                     |               |             |                                                                                                                |
| Locus                                                                                                                                                                                      | Group      | GroupType      | Length | #UniquePeptides | MolWt | SequenceCount | SpectrumCount | NSAF | Coverage            | Protein Score | Description |                                                                                                                |
| 1                                                                                                                                                                                          | P9WMU1     | 11             | Unique | 260             | 40    | 28242.1       | 40            | 110  | 0.00362012636416144 | 0.9654        | 314.54      | Cell wall synthesis protein Wag31 OS=Mycobacterium tuberculosis (strain ATCC 25618 / H37Rv) GN=wag31 PE=1 SV=1 |

  

| File Name               | Scan No | Z | Unique | MeasuredMH  | TheoreticalMH | PPM      | PrimaryScore | SecondaryScore   | DeltaCN | PeaksMatched | BayesianScore | PeptideSequence                                                       |
|-------------------------|---------|---|--------|-------------|---------------|----------|--------------|------------------|---------|--------------|---------------|-----------------------------------------------------------------------|
| 171213_PT_H37Rv_1-4.sqt | 19526   | 4 | True   | 4974.448874 | 4973.447298   | -0.35662 | 3.4989       | 2.80676617404137 | 0.231   | 40           | 0.4147        | R.INELDQELAAGGGAGVTPQATQAI PAYEPEPGKPAPA AVSAGM(+15.994900) NEEQALK A |
| 171213_PT_H37Rv_1-3.sqt | 14800   | 4 | True   | 2145.198385 | 2144.197484   | -1.14162 | 2.5633       | 2.88419089882108 | 0.3028  | 32           | 0.72722       | M.PLTPADVHN VAFSKPPIGKR G                                             |
| 171213_PT_H37Rv_1-3.sqt | 37701   | 3 | True   | 2343.069554 | 2341.083027   | -8.60965 | 2.1896       | 2.93181894781034 | 0.288   | 18           | 0.45205       | R.GYNEVDVDFLDLVENELTR L                                               |
| 171213_PT_H37Rv_1-2.sqt | 12969   | 3 | True   | 1988.998219 | 1988.981814   | 8.24787  | 2.8999       | 3.00578260940749 | 0.2997  | 25           | 0.68917       | A.ERKHS(+162.052824)EIMG TINGQR A                                     |
| 171213_PT_H37Rv_1-3.sqt | 6115    | 2 | True   | 1187.599723 | 1187.601491   | -1.48872 | 2.4279       | 3.00983119793349 | 0.3261  | 13           | 0.41932       | KADALQADAERK H                                                        |

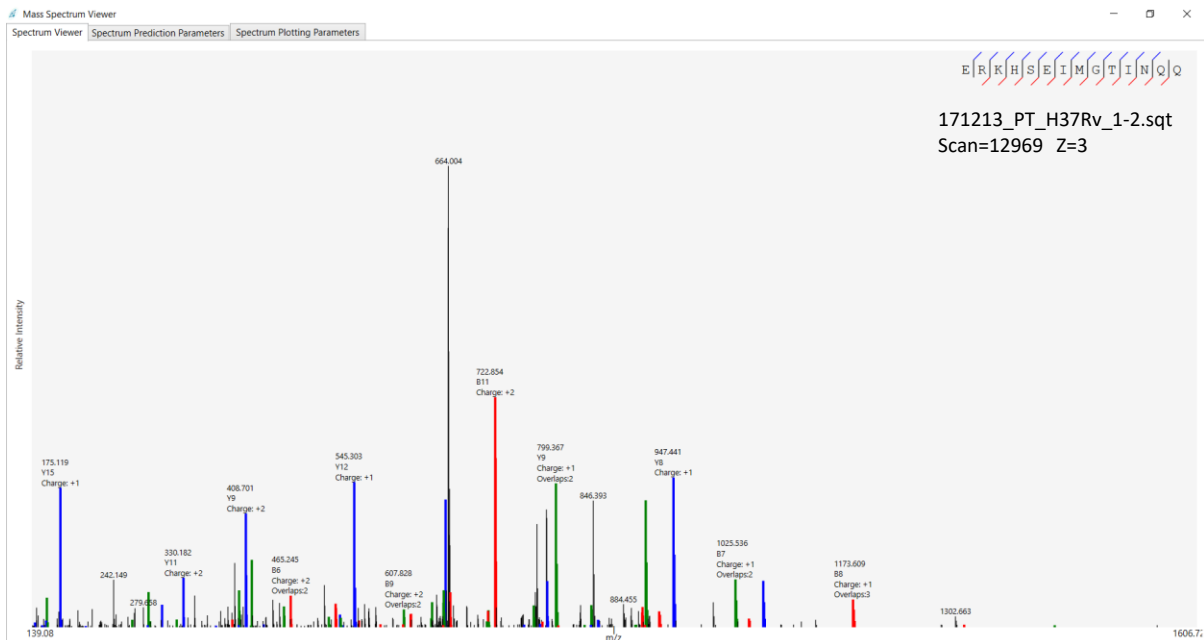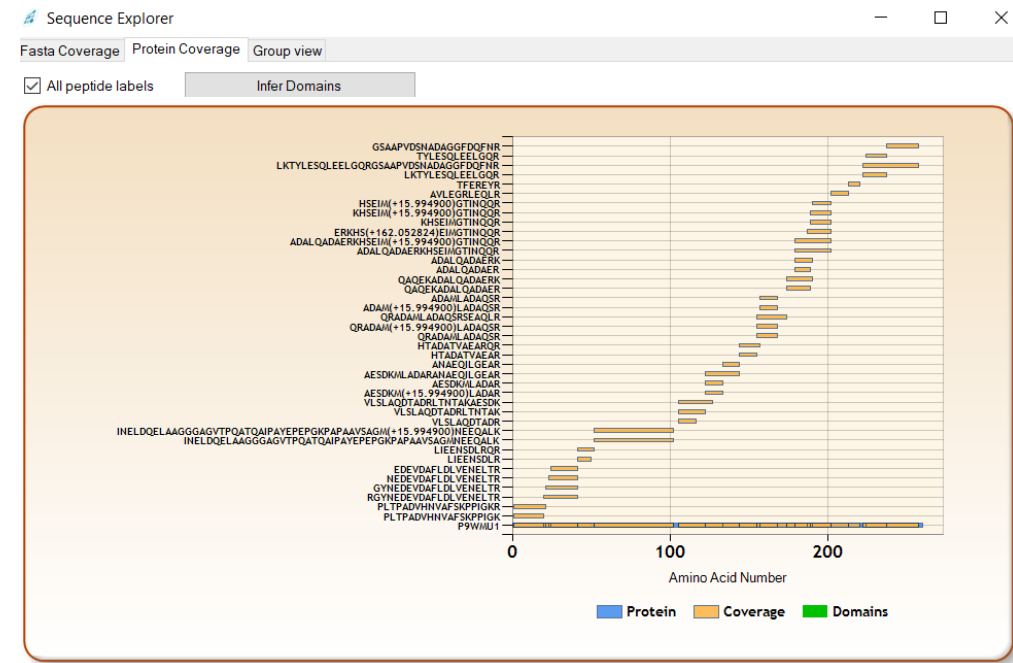



# Glutamine synthetase GlnA1 (glutamine synthase) (Rv2220)

## Modification: Hex

| File                                                                                                                                                                                       | Statistics | Tools          |        |                 |         |               |               |                     |          |               |                                                                                                   |
|--------------------------------------------------------------------------------------------------------------------------------------------------------------------------------------------|------------|----------------|--------|-----------------|---------|---------------|---------------|---------------------|----------|---------------|---------------------------------------------------------------------------------------------------|
| Control                                                                                                                                                                                    | Follow up  | Result Browser |        |                 |         |               |               |                     |          |               |                                                                                                   |
| Spec FDR: 44 / 36033 = 0.12%    Pep FDR: 27 / 17879 = 0.15%    Prot FDR: 14 / 1494 = 0.94%    # Prot (Max Parsimony): 1474    Unique Prot: 1473    Unlabeled Decoys: 0 / 0                 |            |                |        |                 |         |               |               |                     |          |               |                                                                                                   |
| View mode: <input checked="" type="radio"/> Proteins <input type="radio"/> Proteins Max Pars <input type="radio"/> Peptides <input type="radio"/> Scans <input type="text" value="glna1"/> |            |                |        |                 |         |               |               |                     |          |               |                                                                                                   |
| Locus                                                                                                                                                                                      | Group      | GroupType      | Length | #UniquePeptides | MolWt   | SequenceCount | SpectrumCount | NSAF                | Coverage | Protein Score | Description                                                                                       |
| 1 P9WN39                                                                                                                                                                                   | 387        | Unique         | 478    | 71              | 53518.3 | 71            | 255           | 0.00456474663263414 | 0.9582   | 781.0605      | Glutamine synthetase OS=Mycobacterium tuberculosis (strain ATCC 25618 / H37Rv) GN=glnA1 PE=1 SV=1 |

  

| File Name               | Scan No | Z | Unique | MeasuredMH  | TheoreticalMH | PPM      | PrimaryScore | SecondaryScore   | DeltaCN | PeaksMatched | BayesianScore | PeptideSequence                                                  |
|-------------------------|---------|---|--------|-------------|---------------|----------|--------------|------------------|---------|--------------|---------------|------------------------------------------------------------------|
| 171213_PT_H37Rv_1-2.sqt | 11970   | 2 | True   | 1170.578477 | 1170.578965   | -0.41689 | 1.9344       | 5.24572491642887 | 0.4547  | 10           | 0.71804       | A.FTNPTVNSYK.R                                                   |
| 171213_PT_H37Rv_1-2.sqt | 21954   | 2 | True   | 2060.937108 | 2060.942058   | -2.40182 | 3.2584       | 11.5610658402982 | 0.5561  | 21           | 0.78502       | D.AISGWVNTGAATEADGSPNR.G                                         |
| 171213_PT_H37Rv_1-2.sqt | 28756   | 4 | True   | 3893.832907 | 3892.804416   | 6.45662  | 3.4408       | 7.39551562981713 | 0.394   | 32           | 0.69643       | F.CDLPGIM(+15.994900)QHFT(+162.052824)IPASAFDKSVFDDGLAFDGGSSIR.G |

### Mass Spectrum Viewer

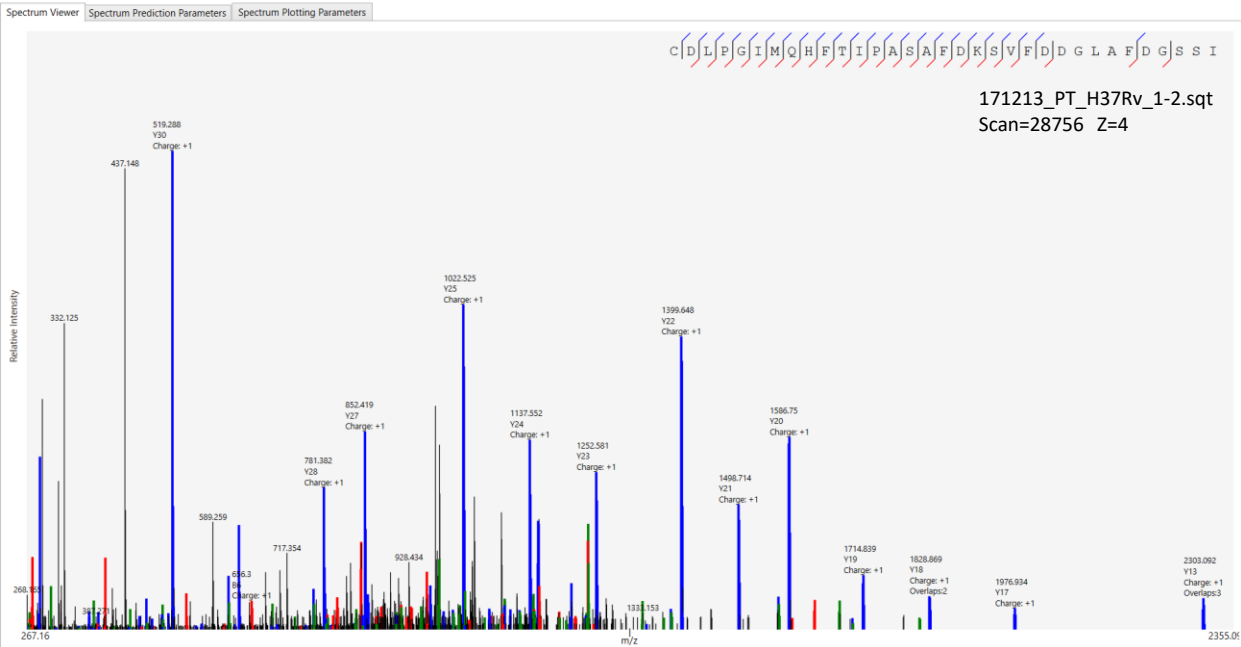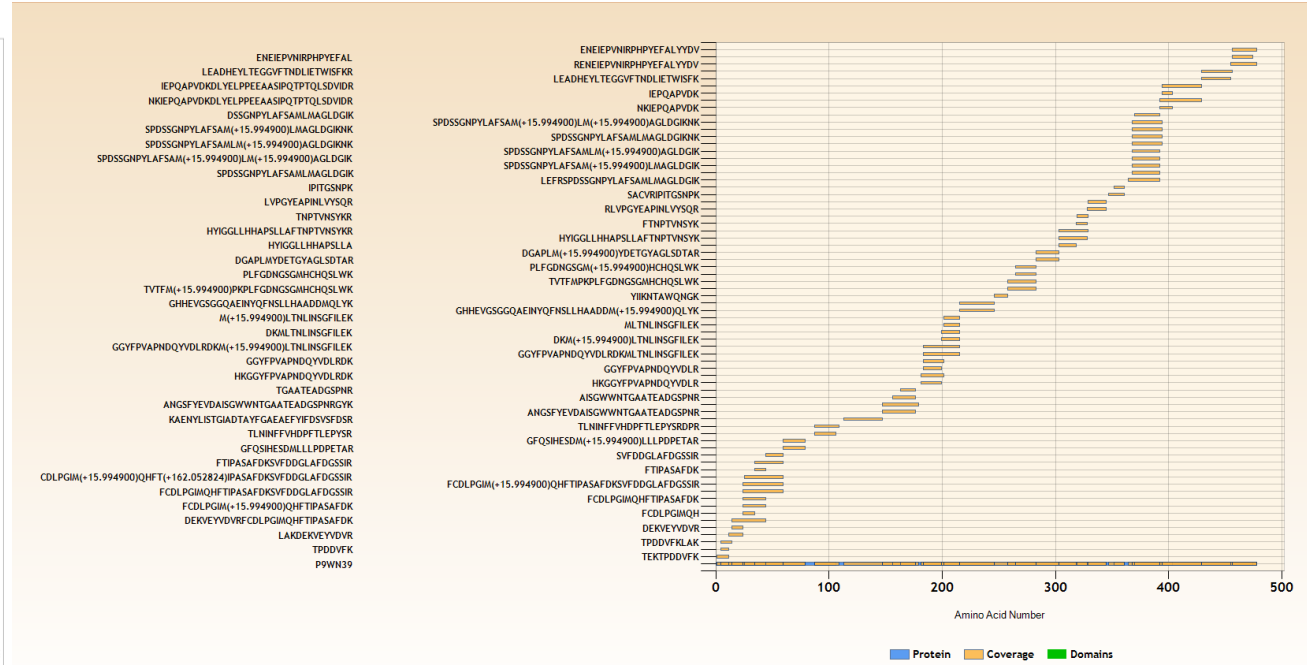

# Pyruvate dehydrogenase E1 component AceE (Rv2241)

## Modification: Hex-Hex

| File                                                                                                                                                                                      | Statistics | Tools          |                 |          |               |               |                     |          |               |                                                                                                                 |
|-------------------------------------------------------------------------------------------------------------------------------------------------------------------------------------------|------------|----------------|-----------------|----------|---------------|---------------|---------------------|----------|---------------|-----------------------------------------------------------------------------------------------------------------|
| Control                                                                                                                                                                                   | Follow up  | Result Browser |                 |          |               |               |                     |          |               |                                                                                                                 |
| Spec FDR: 47 / 35750 = 0.13% Pep FDR: 22 / 17513 = 0.13% Prot FDR: 14 / 1467 = 0.95% # Prot (Max Parsimony): 1454 Unique Prot: 1453 Unlabeled Decoys: 0 / 0                               |            |                |                 |          |               |               |                     |          |               |                                                                                                                 |
| View mode: <input checked="" type="radio"/> Proteins <input type="radio"/> Proteins Max Pars <input type="radio"/> Peptides <input type="radio"/> Scans <input type="text" value="aceE"/> |            |                |                 |          |               |               |                     |          |               |                                                                                                                 |
| Run                                                                                                                                                                                       | GroupType  | Length         | #UniquePeptides | MolWt    | SequenceCount | SpectrumCount | NSAF                | Coverage | Protein Score | Description                                                                                                     |
| 14                                                                                                                                                                                        | Unique     | 930            | 90              | 103357.7 | 90            | 214           | 0.00202507891638625 | 0.8151   | 676.7804      | Pyruvate dehydrogenase E1 component OS=Mycobacterium tuberculosis (strain ATCC 25618 / H37Rv) GN=aceE PE=1 SV=2 |

  

| # | File Name               | Scan No | Z | Unique | MeasuredMH  | TheoreticalMH | PPM       | PrimaryScore | SecondaryScore   | DeltaCN | PeaksMatched | BayesianScore | PeptideSequence                          |
|---|-------------------------|---------|---|--------|-------------|---------------|-----------|--------------|------------------|---------|--------------|---------------|------------------------------------------|
| 1 | 171213_PT_H37Rv_1-1.sqt | 38117   | 2 | True   | 3111.495409 | 3110.484069   | 2.5679    | 3.2319       | 13.2790171874497 | 0.6285  | 22           | 0.93698       | E GVASYLPDIDPEETSEWESFDTLQR.C            |
| 2 | 171213_PT_H37Rv_1-1.sqt | 37668   | 3 | True   | 1869.974407 | 1869.974527   | -0.06417  | 3.3911       | 11.8221717153379 | 0.5613  | 24           | 0.93157       | D PAFAYEIAIYVESGLAR.M                    |
| 3 | 171213_PT_H37Rv_1-1.sqt | 16045   | 2 | True   | 2172.018485 | 2172.020367   | -0.86648  | 3.2571       | 9.61680598041793 | 0.4964  | 16           | 0.95554       | R QYRIDDVAAAEQITDTPGPGA.-                |
| 4 | 171213_PT_H37Rv_1-1.sqt | 38363   | 3 | True   | 3278.464573 | 3278.499791   | -10.74222 | 4.3373       | 9.40757254150589 | 0.4517  | 28           | 0.91656       | V AS(+324.105600)YLPDIDPEETSEWESFDTLQR.C |
| 5 | 171213_PT_H37Rv_1-1.sqt | 19309   | 2 | True   | 910.497789  | 910.499258    | -1.6134   | 1.8293       | 4.78071475850302 | 0.461   | 10           | 0.93096       | V.PIIPDEAR.T                             |
| 6 | 171213_PT_H37Rv_1-1.sqt | 36529   | 3 | True   | 2951.49625  | 2950.500387   | -2.53668  | 2.6998       | 7.42024895984882 | 0.4364  | 31           | 0.93501       | N.TDAESQVVAVLEALAGDGEIDPVPVAAAR.Q        |
| 7 | 171213_PT_H37Rv_1-1.sqt | 37136   | 2 | True   | 2683.276659 | 2682.289332   | -5.97143  | 3.2781       | 5.7603528261446  | 0.4105  | 15           | 0.93915       | R.RYFNTDAESQVVAVLEALAGDGEID.P            |
| 8 | 171213_PT_H37Rv_1-1.sqt | 38033   | 3 | True   | 3111.466892 | 3110.484069   | -6.59721  | 3.1188       | 7.59293428989291 | 0.4028  | 26           | 0.93788       | E GVASYLPDIDPEETSEWESFDTLQR.C            |
| 9 | 171213_PT_H37Rv_1-1.sqt | 16058   | 3 | True   | 2172.017831 | 2172.020367   | -1.16758  | 2.7533       | 6.4377516497364  | 0.4052  | 17           | 0.90881       | R.QYRIDDVAAAEQITDTPGPGA.-                |

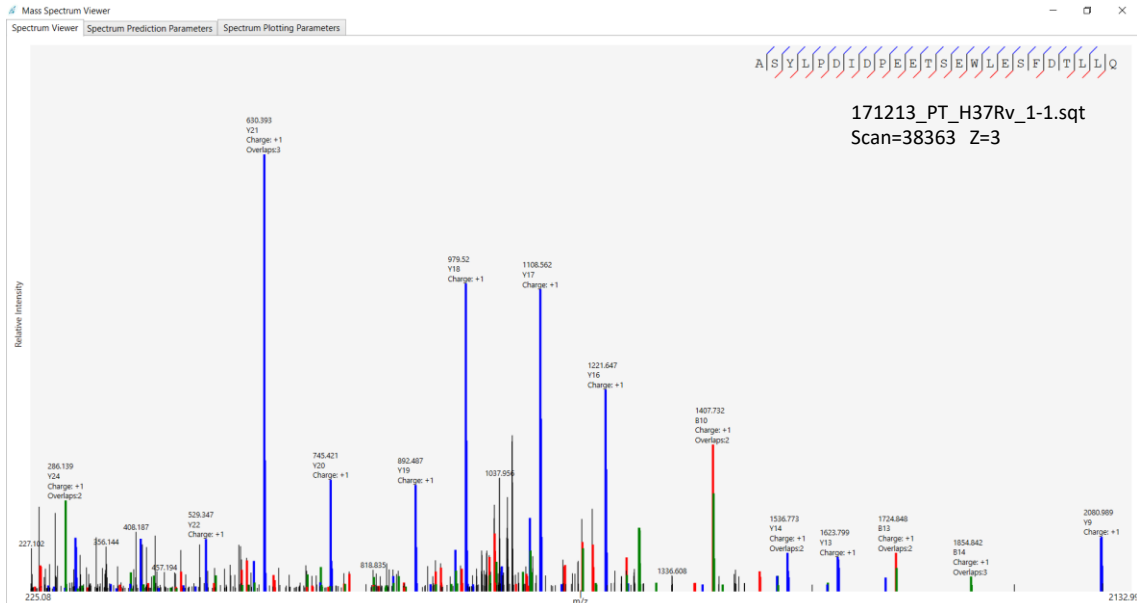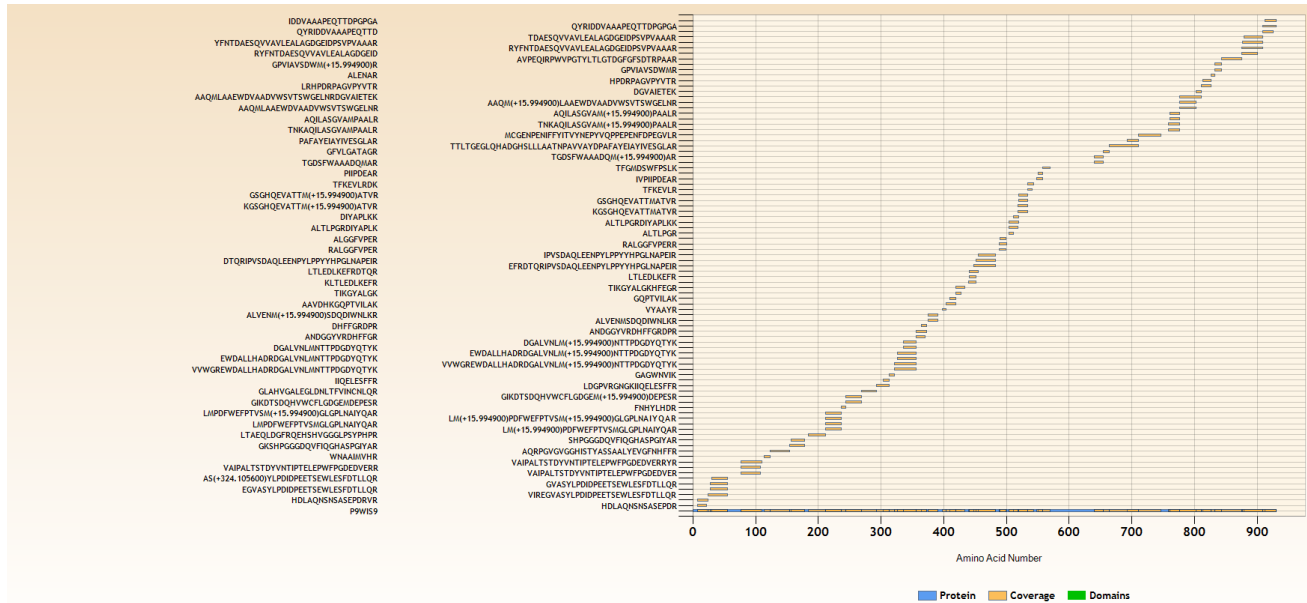

# Fatty-acid-AMP ligase FadD28 (Rv2941)

## Modification: Hex

File Statistics Tools  
Control Follow up Result Browser

Spec FDR: 37 / 31147 = 0.12% Pep FDR: 22 / 16603 = 0.13% Prot FDR: 15 / 1509 = 0.99% # Prot (Max Parsimony): 1488 Unique Prot: 1486 Unlabeled Decoys: 0 / 0

View mode:  Proteins  Proteins Max Pars  Peptides  Scans

| File Name               | Scan No | Z | Unique | MeasuredMH  | TheoreticalMH | PPM      | PrimaryScore | SecondaryScore    | DeltaCN | PeaksMatched | BayesianScore | PeptideSequence                               |
|-------------------------|---------|---|--------|-------------|---------------|----------|--------------|-------------------|---------|--------------|---------------|-----------------------------------------------|
| 171213_PT_H37Rv_2-1.sqt | 20235   | 3 | False  | 1189.73013  | 1189.730321   | -0.16054 | 2.4978       | 4.6428720531721   | 0.4145  | 21           | 0.4628        | R.IKDLLVYGR.N                                 |
| 171213_PT_H37Rv_2-2.sqt | 19340   | 3 | False  | 1189.728983 | 1189.730321   | -1.12463 | 2.0969       | 2.30659311439158  | 0.3255  | 19           | 0.39348       | R.IKDLLVYGR.N                                 |
| 171213_PT_H37Rv_2-2.sqt | 21678   | 4 | True   | 4350.901999 | 4347.919349   | -6.29754 | 2.6813       | 4.14774533894922  | 0.3125  | 44           | 0.37931       | R.IVDSDTCIKCPDGTVEIWHGDNVANGYVQKPDSEER.T      |
| 171213_PT_H37Rv_2-1.sqt | 24480   | 2 | False  | 1838.883104 | 1838.887897   | -2.60647 | 3.7584       | 15.9357740941644  | 0.603   | 16           | 0.66115       | R.NHSPDIEATIQTETR.G                           |
| 171213_PT_H37Rv_2-1.sqt | 24445   | 3 | False  | 1838.887955 | 1838.887897   | 0.03154  | 3.7266       | 11.8126801186563  | 0.5265  | 25           | 0.60756       | R.NHSPDIEATIQTETR.G                           |
| 171213_PT_H37Rv_2-2.sqt | 23341   | 3 | False  | 1838.884576 | 1838.887897   | -1.80599 | 3.8194       | 10.274551233927   | 0.5151  | 28           | 0.58964       | R.NHSPDIEATIQTETR.G                           |
| 171213_PT_H37Rv_2-2.sqt | 23414   | 2 | False  | 1838.886214 | 1838.887897   | -0.91523 | 2.5368       | 8.58440194110969  | 0.4653  | 13           | 0.52388       | R.NHSPDIEATIQTETR.G                           |
| 171213_PT_H37Rv_2-1.sqt | 9782    | 3 | True   | 1883.890221 | 1883.892935   | -1.44064 | 2.9674       | 7.66918130029538  | 0.4167  | 23           | 0.47575       | R.RGACVEQYRQDFAR.L                            |
| 171213_PT_H37Rv_2-2.sqt | 9325    | 4 | True   | 1884.891501 | 1883.892935   | -2.53008 | 2.9072       | 6.2450673059069   | 0.3678  | 28           | 0.44459       | R.RGACVEQYRQDFAR.L                            |
| 171213_PT_H37Rv_2-1.sqt | 29686   | 4 | True   | 4895.328268 | 4892.342497   | -4.95963 | 7.0607       | 17.2575299341467  | 0.6037  | 56           | 0.66912       | R.RPGESPPSIEVDLLDLPAPNGYTFKEDYFSTAYLQYTSGSTRT |
| 171213_PT_H37Rv_2-2.sqt | 28086   | 4 | True   | 4895.3561   | 4892.342497   | 0.72579  | 4.9942       | 11.2739085644997  | 0.5075  | 53           | 0.57662       | R.RPGESPPSIEVDLLDLPAPNGYTFKEDYFSTAYLQYTSGSTRT |
| 171213_PT_H37Rv_2-1.sqt | 30264   | 3 | True   | 2956.487339 | 2955.490551   | -2.21953 | 4.437        | 17.3254073565498  | 0.6214  | 26           | 0.68377       | R.SDSVLSDSPPVAILTSSAVDDVQHVARR                |
| 171213_PT_H37Rv_2-2.sqt | 9639    | 3 | True   | 1505.877642 | 1505.867268   | 6.88901  | 1.6934       | 0.556869562267398 | 0.1352  | 15           | 0.28775       | R.ST(+162.052824)EKLVAIIELK.K                 |

Mass Spectrum Viewer

Spectrum Viewer Spectrum Prediction Parameters Spectrum Plotting Parameters

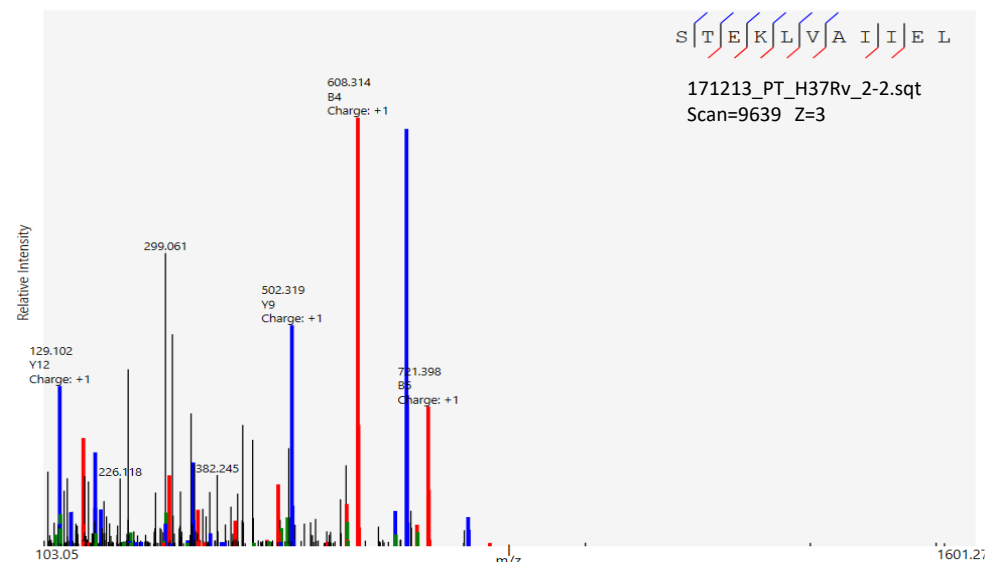

Sequence Explorer

Fasta Coverage Protein Coverage Group view

All peptide labels  Infer Domains

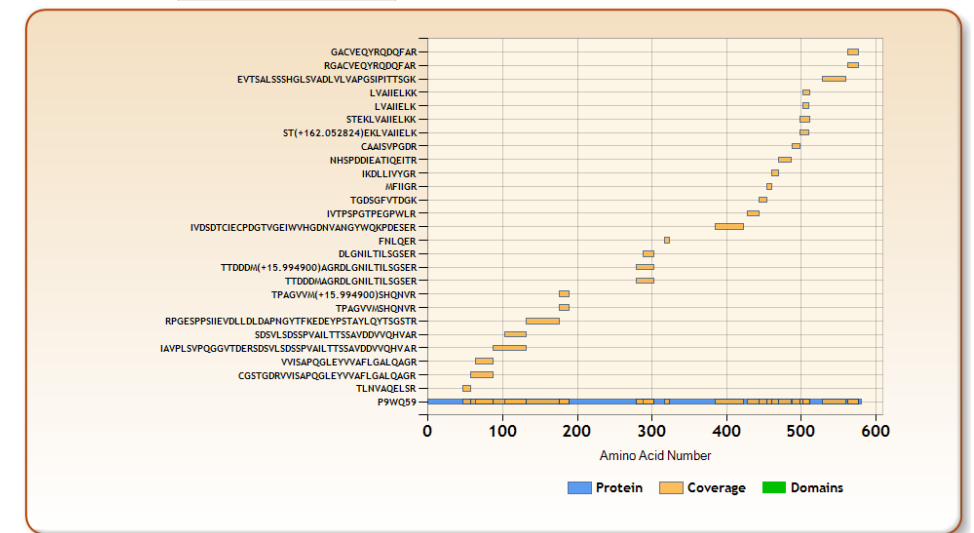

# Unknown protein (Rv3491) Modification: Hex

| File                                                                                                                                                                                        | Statistics | Tools          |        |                 |               |               |               |                      |          |               |                                                                                                       |                                       |
|---------------------------------------------------------------------------------------------------------------------------------------------------------------------------------------------|------------|----------------|--------|-----------------|---------------|---------------|---------------|----------------------|----------|---------------|-------------------------------------------------------------------------------------------------------|---------------------------------------|
| Control                                                                                                                                                                                     | Follow up  | Result Browser |        |                 |               |               |               |                      |          |               |                                                                                                       |                                       |
| Spec FDR: 37 / 31147 = 0.12% Pep FDR: 22 / 16603 = 0.13% Prot FDR: 15 / 1509 = 0.99% # Prot (Max Parsimony): 1488 Unique Prot: 1486 Unlabeled Decoys: 0 / 0                                 |            |                |        |                 |               |               |               |                      |          |               |                                                                                                       |                                       |
| View mode: <input checked="" type="radio"/> Proteins <input type="radio"/> Proteins Max Pars <input type="radio"/> Peptides <input type="radio"/> Scans <input type="text" value="Rv3491"/> |            |                |        |                 |               |               |               |                      |          |               |                                                                                                       |                                       |
| Locus                                                                                                                                                                                       | Group      | GroupType      | Length | #UniquePeptides | MolWt         | SequenceCount | SpectrumCount | NSAF                 | Coverage | Protein Score | Description                                                                                           |                                       |
| 1 I6XHD1                                                                                                                                                                                    | 925        | Unique         | 192    | 5               | 20331.8       | 5             | 6             | 0.000301984189206354 | 0.1771   | 16.8178       | Uncharacterized protein OS=Mycobacterium tuberculosis (strain ATCC 25618 / H37Rv) GN=Rv3491 PE=1 SV=1 |                                       |
| File Name                                                                                                                                                                                   | Scan No    | Z              | Unique | MeasuredMH      | TheoreticalMH | PPM           | PrimaryScore  | SecondaryScore       | DeltaCN  | PeaksMatched  | BayesianScore                                                                                         | PeptideSequence                       |
| 1 171218_PT_H37Rv_2-5.sqt                                                                                                                                                                   | 8463       | 3              | True   | 1193.599548     | 1193.60216    | -2.18834      | 3.0441        | 10.9822972139081     | 0.5206   | 19            | 0.56245                                                                                               | R.TDRLQNFSGR.A                        |
| 2 171218_PT_H37Rv_2-5.sqt                                                                                                                                                                   | 8468       | 2              | True   | 1193.601558     | 1193.60216    | -0.50436      | 2.2999        | 4.79754207863555     | 0.4506   | 15            | 0.46533                                                                                               | R.TDRLQNFSGR.A                        |
| 3 171218_PT_H37Rv_2-5.sqt                                                                                                                                                                   | 19667      | 3              | True   | 2351.293435     | 2351.296924   | -1.48386      | 2.2638        | 3.13040717688059     | 0.2353   | 23            | 0.35155                                                                                               | K.LSKQPFSLQLIGPPPS(+162.052824)PVQR.Y |
| 4 171218_PT_H37Rv_2-5.sqt                                                                                                                                                                   | 21659      | 3              | True   | 2023.083586     | 2023.085869   | -1.12848      | 2.7994        | 6.93409925432174     | 0.394    | 17            | 0.37973                                                                                               | K.QPFS(+162.052824)LQLIGPPPSPVQR.Y    |
| 5 171218_PT_H37Rv_2-5.sqt                                                                                                                                                                   | 21683      | 2              | True   | 2023.082922     | 2023.085869   | -1.45669      | 2.9962        | 7.48757377423508     | 0.4112   | 17            | 0.45811                                                                                               | K.QPFS(+162.052824)LQLIGPPPSPVQR.Y    |

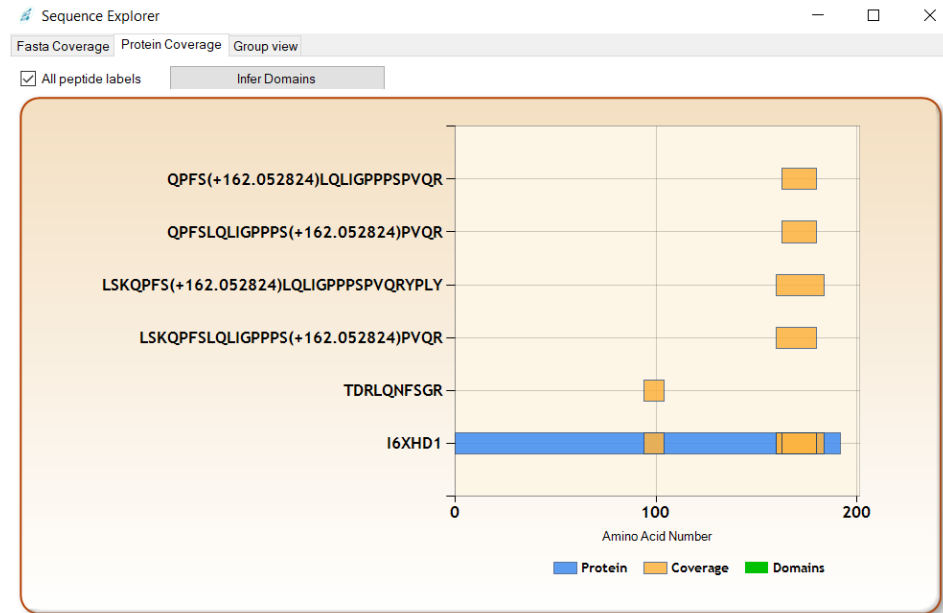

MS/MS Fragmentation of **LSKQPFSLQLIGPPPSVQR**  
Found in **WP\_015303914.1** in **NCBIprot**, hypothetical protein [Mycobacterium canettii]

Match to Query 3: 2350.286093 from(2351.293369,1+) index(1)  
Data file Scans Rv3491 Hex Mascot.txt

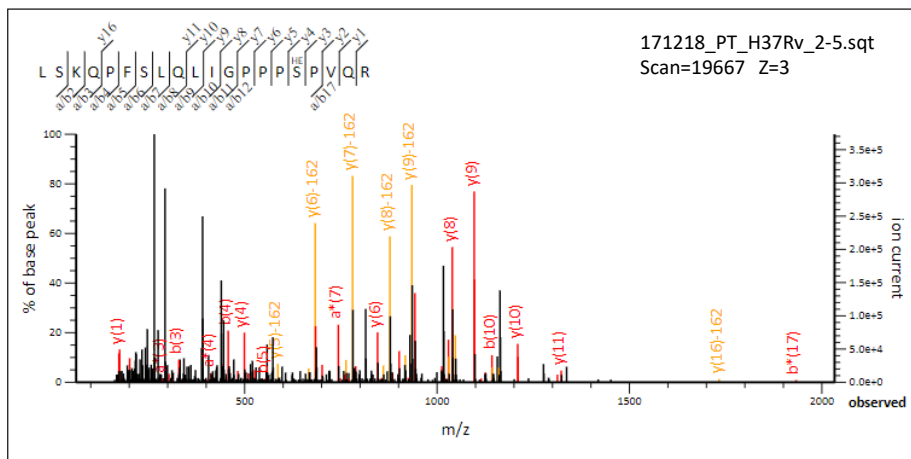

MS/MS Fragmentation of **QPFSLQLIGPPPSVQR**  
Found in **WP\_015303914.1** in **NCBIprot**, hypothetical protein [Mycobacterium canettii]

Match to Query 2: 2022.076316 from(2023.083592,1+) index(2)  
Data file Scans Rv3491 Hex Mascot.txt

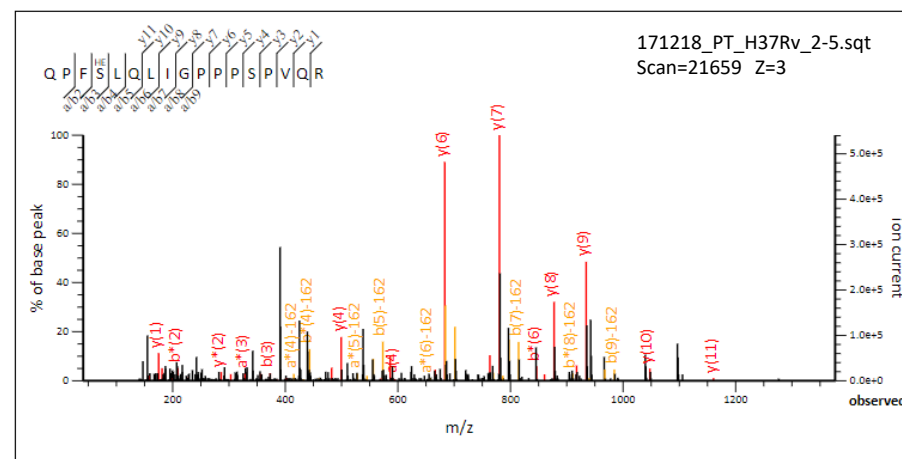

# Conserved protein (Rv1352) Modification: Hex-Hex

File Statistics Tools  
Control Follow up Result Browser

Spec FDR: 47 / 35750 = 0.13% Pep FDR: 22 / 17513 = 0.13% Prot FDR: 14 / 1467 = 0.95% # Prot (Max Parsimony): 1454 Unique Prot: 1453 U

View mode:  Proteins  Proteins Max Pars  Peptides  Scans

| Locus | Group  | GroupType | Length | #UniquePeptides | MolWt | SequenceCount | SpectrumCount | NSAF                 | Coverage | Protein Score | Description                                                                                                  |
|-------|--------|-----------|--------|-----------------|-------|---------------|---------------|----------------------|----------|---------------|--------------------------------------------------------------------------------------------------------------|
| 1     | P9WM15 | 1001      | Unique | 123             | 4     | 12823.4       | 4             | 0.000858592838951088 | 0.1138   | 36.1674       | Uncharacterized protein Rv1352 OS=Mycobacterium tuberculosis (strain ATCC 25618 / H37Rv) GN=Rv1352 PE=1 SV=1 |

  

| File Name | Scan No                 | Z     | Unique | MeasuredMH | TheoreticalMH | PPM         | PrimaryScore | SecondaryScore | DeltaCN           | PeaksMatched | BayesianScore | PeptideSequence |                                                         |
|-----------|-------------------------|-------|--------|------------|---------------|-------------|--------------|----------------|-------------------|--------------|---------------|-----------------|---------------------------------------------------------|
| 1         | 171213_PT_H37Rv_1-5.sqt | 24532 | 2      | True       | 1499.817492   | 1499.821655 | -2.77567     | 2.9231         | 10.0660064820339  | 0.5725       | 15            | 0.65036         | R.TEGPSNPLILVFGR.V                                      |
| 2         | 171213_PT_H37Rv_1-6.sqt | 22696 | 2      | True       | 1499.817064   | 1499.821655 | -3.06104     | 2.8106         | 8.9327086353779   | 0.5493       | 16            | 0.61982         | R.TEGPSNPLILVFGR.V                                      |
| 3         | 171213_PT_H37Rv_1-6.sqt | 22847 | 3      | True       | 1499.818241   | 1499.821655 | -2.27628     | 2.5044         | 8.44487252983661  | 0.4651       | 15            | 0.54015         | R.TEGPSNPLILVFGR.V                                      |
| 4         | 171213_PT_H37Rv_1-6.sqt | 20762 | 2      | True       | 2527.214892   | 2526.21471  | -1.25355     | 2.9491         | 10.4586134351987  | 0.566        | 20            | 0.96767         | A.ETGEQFPDGGVFLVGTDIAPGTYR.T                            |
| 5         | 171213_PT_H37Rv_1-5.sqt | 22407 | 2      | True       | 2526.220018   | 2526.21471  | 2.10116      | 3.0742         | 14.5473985668407  | 0.5598       | 16            | 0.96993         | A.ETGEQFPDGGVFLVGTDIAPGTYR.T                            |
| 6         | 171213_PT_H37Rv_1-6.sqt | 20753 | 3      | True       | 2526.209049   | 2526.21471  | -2.24091     | 3.7423         | 10.4586134351987  | 0.5297       | 24            | 0.97328         | A.ETGEQFPDGGVFLVGTDIAPGTYR.T                            |
| 7         | 171213_PT_H37Rv_1-6.sqt | 20773 | 3      | True       | 2398.170567   | 2397.172117 | -2.04322     | 4.0363         | 8.33904700603276  | 0.4986       | 28            | 0.94559         | E.TGEQFPDGGVFLVGTDIAPGTYR.T                             |
| 8         | 171213_PT_H37Rv_1-5.sqt | 22306 | 3      | True       | 2526.216903   | 2526.21471  | 0.8681       | 3.6539         | 9.9463950535474   | 0.5049       | 29            | 0.97466         | A.ETGEQFPDGGVFLVGTDIAPGTYR.T                            |
| 9         | 171213_PT_H37Rv_1-5.sqt | 22369 | 2      | True       | 2527.212206   | 2526.21471  | -2.31639     | 2.5605         | 8.57376354290463  | 0.5368       | 16            | 0.9686          | A.ETGEQFPDGGVFLVGTDIAPGTYR.T                            |
| 10        | 171213_PT_H37Rv_1-6.sqt | 20835 | 2      | True       | 2398.171923   | 2397.172117 | -1.47779     | 2.6253         | 8.40833878650415  | 0.4584       | 14            | 0.94638         | E.TGEQFPDGGVFLVGTDIAPGTYR.T                             |
| 11        | 171213_PT_H37Rv_1-6.sqt | 21045 | 3      | True       | 2526.206333   | 2526.21471  | -3.31604     | 3.2405         | 8.23578073197805  | 0.4159       | 27            | 0.96993         | A.ETGEQFPDGGVFLVGTDIAPGTYR.T                            |
| 12        | 171213_PT_H37Rv_1-3.sqt | 24194 | 3      | True       | 2795.470616   | 2794.468831 | -0.55983     | 2.0472         | 0.215671536475509 | 0.0643       | 19            | 0.31251         | R.TLALRASAGLVAGM(+15.994900)AMAAIT(+324.105600)LAPGAR.A |

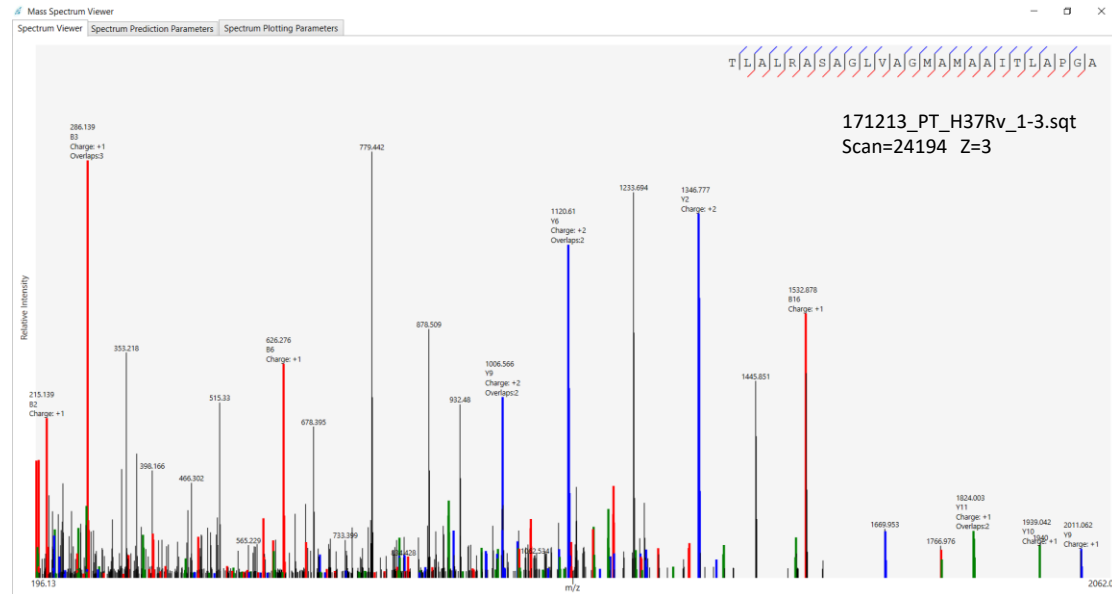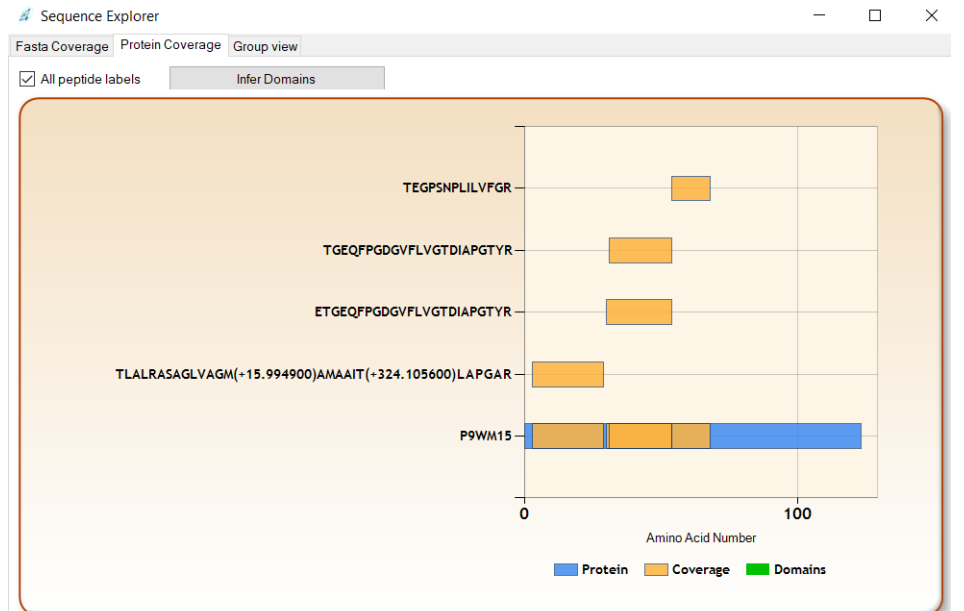



# Probable carbamoyl-phosphate synthase large chain CarB (Rv1384) Modification: Hex-Hex-Hex

| Locus | Group  | GroupType | Length | #UniquePeptides | MolWt | SequenceCount | SpectrumCount | NSAF | Coverage             | Protein Score | Description                                                                                                          |
|-------|--------|-----------|--------|-----------------|-------|---------------|---------------|------|----------------------|---------------|----------------------------------------------------------------------------------------------------------------------|
| 1     | P9WPK3 | 902       | Unique | 1115            | 10    | 11868.8       | 10            | 14   | 0.000107626517146687 | 32.3775       | Carbamoyl-phosphate synthase large chain OS=Mycobacterium tuberculosis (strain ATCC 25618 / H37Rv) GN=carB PE=1 SV=1 |

  

| File Name               | Scan No | Z | Unique | MeasuredMH  | TheoreticalMH | PPM      | PrimaryScore | SecondaryScore     | DeltaCN | PeaksMatched | BayesianScore | PeptideSequence                                |
|-------------------------|---------|---|--------|-------------|---------------|----------|--------------|--------------------|---------|--------------|---------------|------------------------------------------------|
| 171213_PT_H37Rv_1-1.sqt | 32499   | 3 | True   | 3685.94199  | 3684.948319   | -2.62592 | 4.8518       | 11.6778001081605   | 0.539   | 32           | 0.58967       | R.LADAGVPIVGTPEAIDLAEDRGAFGDLLSAAGLPAPK.Y      |
| 171213_PT_H37Rv_1-1.sqt | 27698   | 2 | True   | 2002.94371  | 2002.950497   | -3.38851 | 2.7751       | 6.66873837851164   | 0.4982  | 19           | 0.52184       | R.AGFWTAPDDPGGIEEALTR.L                        |
| 171213_PT_H37Rv_1-1.sqt | 13664   | 3 | True   | 1561.833225 | 1561.833282   | -0.0365  | 2.6406       | 5.94077143279246   | 0.4122  | 22           | 0.4849        | R.ATQLSPEHPVLVDR.F                             |
| 171213_PT_H37Rv_1-1.sqt | 36507   | 3 | True   | 3132.708592 | 3130.699422   | 0.78846  | 2.6471       | 3.34670919637809   | 0.325   | 29           | 0.44915       | R.GNKIDALLATLGGQTALNTAVALYESGVLEKY             |
| 171213_PT_H37Rv_1-1.sqt | 36494   | 4 | True   | 3132.710104 | 3130.699422   | 1.2711   | 2.6701       | 1.72036947314138   | 0.1999  | 35           | 0.40734       | R.GNKIDALLATLGGQTALNTAVALYESGVLEKY             |
| 171213_PT_H37Rv_1-1.sqt | 25169   | 3 | True   | 2189.211704 | 2188.212466   | -1.8783  | 2.4102       | 1.95899538860397   | 0.2309  | 20           | 0.38849       | R.IAEEIGYVPLVRPSYVLGGR.G                       |
| 171213_PT_H37Rv_1-1.sqt | 36617   | 4 | True   | 3130.704733 | 3130.699422   | 1.69642  | 2.3481       | 0.142716302201595  | 0.1241  | 37           | 0.38255       | R.GNKIDALLATLGGQTALNTAVALYESGVLEKY             |
| 171213_PT_H37Rv_1-4.sqt | 30194   | 4 | True   | 3630.891175 | 3628.875167   | 2.56356  | 2.6021       | 0.944175935363691  | 0.1424  | 42           | 0.36121       | R.IDGYEIRSAAVAGNICPITTVQGASAAVQIEAGIR.G        |
| 171213_PT_H37Rv_1-2.sqt | 18460   | 3 | True   | 2454.182163 | 2453.196258   | -7.10827 | 2.0717       | 0.539568092631645  | 0.1547  | 22           | 0.34467       | R.NFVEALGKVM(+15.994900)RSLETT(+486.158400)R.A |
| 171213_PT_H37Rv_1-3.sqt | 18252   | 3 | True   | 2454.186375 | 2453.196258   | -5.39201 | 1.7961       | 0.0954101848046582 | 0.022   | 21           | 0.34178       | R.NFVEALGKVM(+15.994900)RSLETT(+486.158400)R.A |

Mass Spectrum Viewer

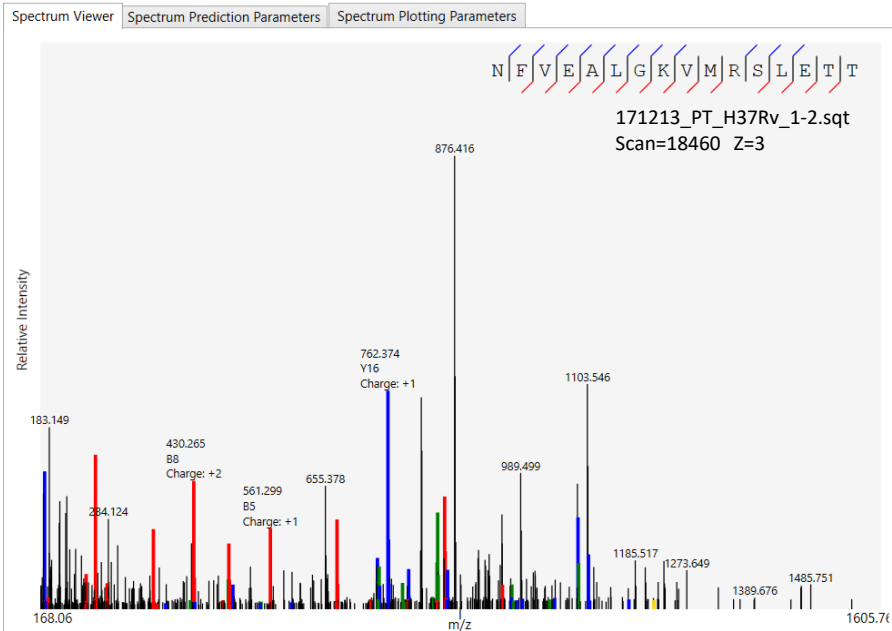

Sequence Explorer

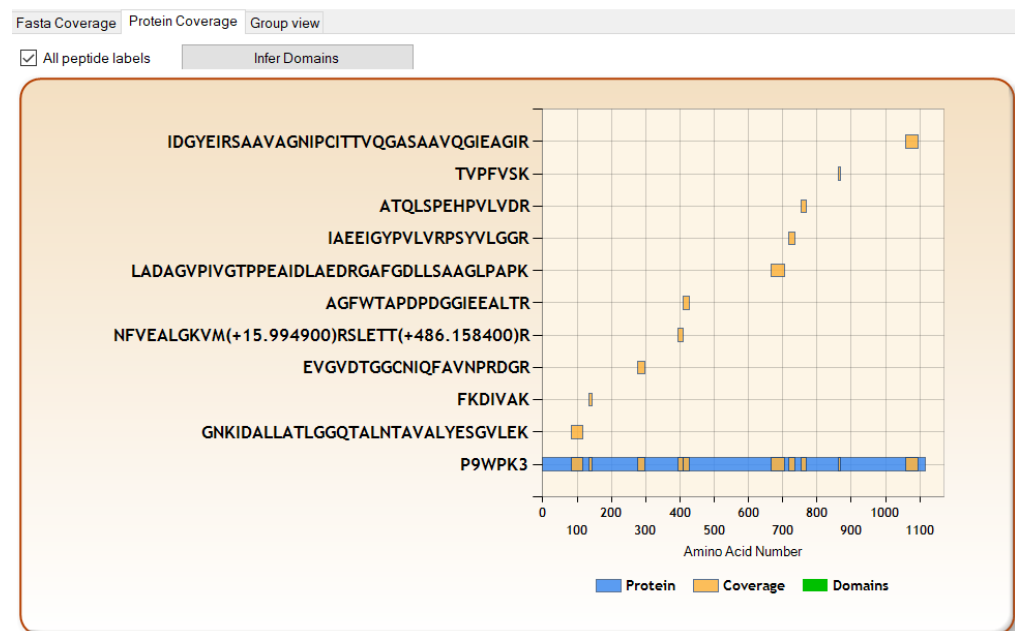

Supplement: pone.0221837.s006.pdf [file pone.0221837.s006.pdf]
