# Supplementary material for: Integrative proteomic and glycoproteomic profiling of Mycobacterium tuberculosis culture filtrate
Source: PubMed Central journal article supplement (PMC7053730; doi:10.1371/journal.pone.0221837), 2020-03-03
Supplement: pone.0221837.s001.pdf [file pone.0221837.s001.pdf]

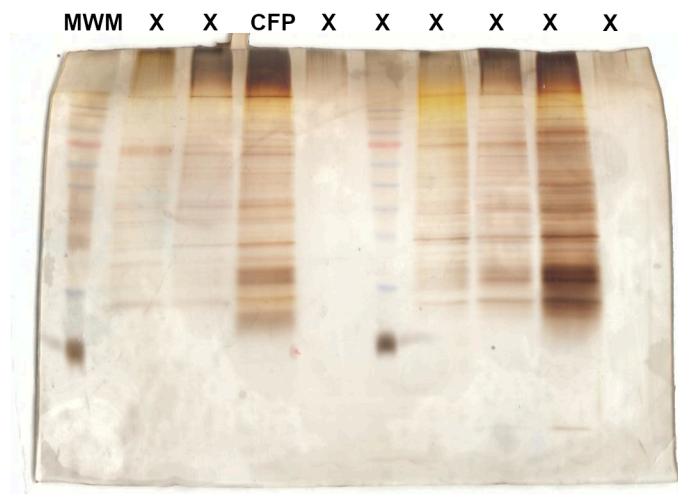

**S1A Original Gel Image**

**MWM: Molecular weight marker (Thermo Fischer Scientific, # 26616).**

**CFP: M. tuberculosis culture filtrate proteins (CFP).**

**Method used to capture the image: Desktop Image Scanner**

**Staining method: Silver nitrate**

MWM X CFP (1) X CFP (2) X MWM X X

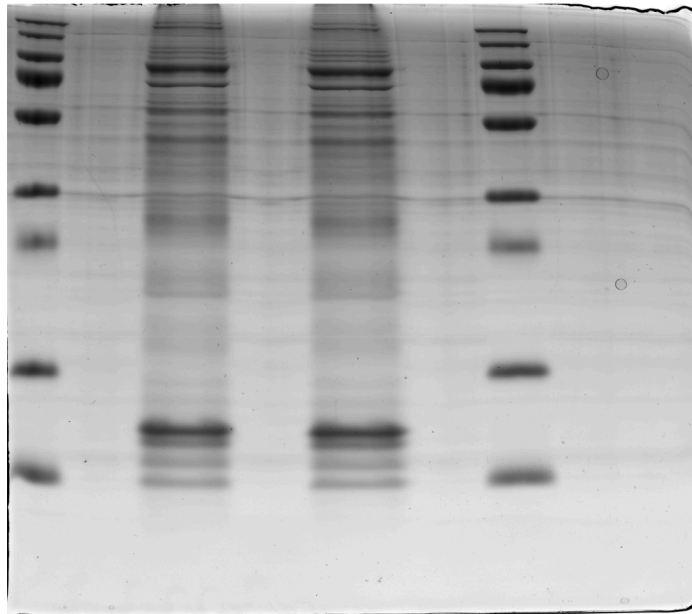

**S1B Original Gel Image**

MWM: Molecular weight marker (Thermo Fischer Scientific, # 26616).

CFP(1) and CFP(2): Technical replicates of *M. tuberculosis* culture filtrate proteins.

Method used to capture the image: Desktop Image Scanner

Staining method: CBB G-250
