# Supplementary material for: Integrative proteomic and glycoproteomic profiling of Mycobacterium tuberculosis culture filtrate
Source: PubMed Central journal article supplement (PMC7053730; doi:10.1371/journal.pone.0221837), 2020-03-03
Supplement: pone.0221837.s005.pdf [file pone.0221837.s005.pdf]

.: Filter :: Search Engine Processor (SEPro - for PSMs)

File Statistics Tools  
Control Follow up Result Browser

Spec FDR: 44 / 36033 = 0.12% Pep FDR: 27 / 17879 = 0.15% Prot FDR: 14 / 1494 = 0.94% # Prot (Max Parsimony): 1474 Unique Prot: 1473 Unlabeled Decoys: 0 / 0

View mode:  Proteins  Proteins Max Pars  Peptides  Scans

| Rank | AbundanceCount | SpectrumCount | NSAF                | Coverage | Protein Score | Description                                                                                                              |
|------|----------------|---------------|---------------------|----------|---------------|--------------------------------------------------------------------------------------------------------------------------|
| 1    |                | 84            | 0.00227426563649607 | 0.7262   | 292.4047      | Alanine and proline-rich secreted protein Apa OS=Mycobacterium tuberculosis (strain ATCC 25618 / H37Rv) GN=apa PE=1 SV=1 |

| Rank | File Name               | Scan No | Z | Unique | MeasuredMH  | TheoreticalMH | PPM      | PrimaryScore | SecondaryScore     | DeltaCN | PeaksMatched | BayesianScore | PeptideSequence                                                           |
|------|-------------------------|---------|---|--------|-------------|---------------|----------|--------------|--------------------|---------|--------------|---------------|---------------------------------------------------------------------------|
| 69   | 171213_PT_H37Rv_1-3.sqt | 20588   | 4 | True   | 3133.529787 | 3132.549738   | -7.43602 | 3.0849       | 5.15162298739723   | 0.36    | 38           | 0.5174        | K.FSDPSKPNGIWTGVIGSPAANAPDAGPPQR.W                                        |
| 70   | 171213_PT_H37Rv_1-3.sqt | 19457   | 3 | True   | 4243.27512  | 4240.27647    | -2.6866  | 4.4726       | 9.46523262160497   | 0.4967  | 35           | 0.56732       | K.ALAESIRPLVAPPAPAPAPAEPAPAPAPAGEVAPTPTTPTPQR.T                           |
| 71   | 171213_PT_H37Rv_1-3.sqt | 19135   | 4 | True   | 4242.275046 | 4240.27647    | -1.91501 | 4.3682       | 7.61703184147197   | 0.4518  | 42           | 0.53736       | K.ALAESIRPLVAPPAPAPAPAEPAPAPAPAGEVAPTPTTPTPQR.T                           |
| 72   | 171213_PT_H37Rv_1-3.sqt | 18825   | 3 | True   | 4566.377537 | 4564.382118   | -2.47045 | 3.0734       | 4.99377817702983   | 0.0469  | 26           | 0.3594        | K.ALAESIRPLVAPPAPAPAPAEPAPAPAPAGEVAPTPT(+162.052824)T(+162.052824)PTPQR.T |
| 73   | 171213_PT_H37Rv_1-3.sqt | 18776   | 4 | True   | 4566.377585 | 4564.382118   | -2.45994 | 3.3228       | 5.22320989406123   | 0.0531  | 32           | 0.33023       | K.ALAESIRPLVAPPAPAPAPAEPAPAPAPAGEVAPTPT(+162.052824)T(+162.052824)PTPQR.T |
| 74   | 171213_PT_H37Rv_1-3.sqt | 18850   | 4 | True   | 4564.378265 | 4564.382118   | -0.84415 | 2.7023       | -0.928219302739429 | 0.0578  | 32           | 0.31426       | K.ALAESIRPLVAPPAPAPAPAEPAPAPAPAGEVAPTPT(+162.052824)T(+162.052824)PTPQR.T |
| 75   | 171213_PT_H37Rv_1-3.sqt | 19094   | 3 | True   | 4402.327971 | 4402.329294   | -0.30052 | 3.9087       | 9.61081793857331   | 0.1726  | 28           | 0.38789       | K.ALAESIRPLVAPPAPAPAPAEPAPAPAPAGEVAPT(+162.052824)PTTPTPQR.T              |
| 76   | 171213_PT_H37Rv_1-3.sqt | 19160   | 4 | True   | 4405.340475 | 4402.329294   | 0.25673  | 4.0045       | 5.12941883008622   | 0.223   | 33           | 0.3666        | K.ALAESIRPLVAPPAPAPAPAEPAPAPAPAGEVAPT(+162.052824)PTTPTPQR.T              |
| 77   | 171213_PT_H37Rv_1-2.sqt | 19370   | 4 | True   | 4404.31655  | 4402.329294   | -4.41476 | 2.9788       | 1.50058350752202   | 0.1886  | 33           | 0.34597       | K.ALAESIRPLVAPPAPAPAPAEPAPAPAPAGEVAPT(+162.052824)PTTPTPQR.T              |
| 78   | 171213_PT_H37Rv_1-3.sqt | 20710   | 2 | True   | 2807.54051  | 2807.545427   | -1.75135 | 3.3637       | 12.0287636305598   | 0.5994  | 21           | 0.79808       | K.ALAESIRPLVAPPAPAPAPAEPAPAPAPA.G                                         |
| 79   | 171213_PT_H37Rv_1-3.sqt | 20608   | 3 | True   | 2807.539511 | 2807.545427   | -2.10718 | 3.0844       | 6.91276782080568   | 0.38    | 19           | 0.65245       | K.ALAESIRPLVAPPAPAPAPAEPAPAPAPA.G                                         |
| 80   | 171213_PT_H37Rv_1-3.sqt | 18551   | 3 | True   | 2784.421482 | 2783.422352   | -1.51558 | 3.1142       | 5.27655587476652   | 0.3501  | 28           | 0.71765       | D.PSKPNGIWTGVIGSPAANAPDAGPPQR.W                                           |
| 81   | 171213_PT_H37Rv_1-3.sqt | 14912   | 2 | True   | 1589.80266  | 1589.807067   | -2.77204 | 3.2521       | 11.4641353008008   | 0.5696  | 16           | 0.80322       | D.PPFGQPPPVANDR.I                                                         |
| 82   | 171213_PT_H37Rv_1-3.sqt | 15140   | 2 | True   | 1832.016145 | 1832.017729   | -0.86462 | 3.2069       | 12.1610992798874   | 0.6047  | 21           | 0.81038       | D.PNAPPPVIAPNAPQPV.R.I                                                    |
| 83   | 171213_PT_H37Rv_1-3.sqt | 15989   | 3 | True   | 2663.412205 | 2662.409996   | -0.4284  | 3.4855       | 8.37309284744248   | 0.4948  | 26           | 0.76474       | D.PNAPPPADPNAPPPVIAPNAPQPV.R.I                                            |
| 84   | 171213_PT_H37Rv_1-3.sqt | 31022   | 3 | True   | 3212.554295 | 3210.553092   | -1.7111  | 4.1085       | 14.6433326418508   | 0.5379  | 28           | 0.79416       | D.NPVGGFSPALPAGWVESDAAHFYGSALLSK.T                                        |

Generate Search DB Search (Comet PSM) Filter Project Organization Quant Select Analyze Utils Help

## .: Filter :: Search Engine Processor (SEPro - for PSMs)

File Statistics Tools

Control Follow up Result Browser

Spec FDR: 44 / 36033 = 0.12% Pep FDR: 27 / 17879 = 0.15% Prot FDR: 14 / 1494 = 0.94% # Prot (Max Parsimony): 1474 Unique Prot: 1473 Unlabeled Decoys: 0 / 0

View mode:  Proteins  Proteins Max Pars  Peptides  Scans 

| anceCount | SpectrumCount | NSAF                 | Coverage | Protein Score | Description                                                                                                                 |
|-----------|---------------|----------------------|----------|---------------|-----------------------------------------------------------------------------------------------------------------------------|
| 1         | 18            | 0.000606844279032202 | 0.6322   | 57.5418       | Putative diacylated glycolipid transporter LprF OS=Mycobacterium tuberculosis (strain ATCC 25618 / H37Rv) GN=lprF PE=1 SV=1 |

| File Name               | Scan No | Z | Unique | MeasuredMH  | TheoreticalMH | PPM      | PrimaryScore | SecondaryScore     | DeltaCN | PeaksMatched | BayesianScore | PeptideSequence                                         |
|-------------------------|---------|---|--------|-------------|---------------|----------|--------------|--------------------|---------|--------------|---------------|---------------------------------------------------------|
| 171213_PT_H37Rv_1-4.sqt | 22239   | 4 | True   | 4216.116354 | 4213.12724    | -4.96571 | 3.598        | 2.777400279237     | 0.2243  | 40           | 0.37338       | K.GLHSVHVVVTVNNLSTLPFESVDADVTNQPGNGQAVGNAK.V            |
| 171213_PT_H37Rv_1-4.sqt | 17226   | 2 | True   | 1417.766185 | 1417.768557   | -1.67305 | 2.6259       | 7.75405363903626   | 0.5213  | 16           | 0.54237       | K.IYDPGIILDKDR.G                                        |
| 171213_PT_H37Rv_1-4.sqt | 17214   | 3 | True   | 1417.766867 | 1417.768557   | -1.19202 | 2.4377       | 5.11599580975408   | 0.3657  | 19           | 0.43355       | K.IYDPGIILDKDR.G                                        |
| 171213_PT_H37Rv_1-4.sqt | 21129   | 4 | True   | 3093.67568  | 3092.685109   | -4.13069 | 3.0991       | 4.24052707240018   | 0.3189  | 35           | 0.42083       | K.IYDPGIILDKDRGLGAVVGQVQNPTIQGR.D                       |
| 171213_PT_H37Rv_1-4.sqt | 12961   | 3 | True   | 2949.403721 | 2949.405879   | -0.73167 | 3.4126       | 12.0909598384297   | 0.096   | 26           | 0.32854       | K.KPTTASSPS(+162.052824)PGS(+162.052824)PSPEAQQLQDSSK.A |
| 171213_PT_H37Rv_1-4.sqt | 13266   | 3 | True   | 2788.349278 | 2787.353055   | -2.55599 | 3.0382       | 7.84680299797891   | 0.0764  | 29           | 0.31843       | K.KPTTASSPSPGS(+162.052824)PSPEAQQLQDSSK.A              |
| 171213_PT_H37Rv_1-4.sqt | 13707   | 3 | True   | 2626.299839 | 2625.300231   | -1.42482 | 3.8708       | 7.48045630646622   | 0.3047  | 31           | 0.42022       | K.KPTTASSPSPGSPSPEAQQLQDSSK.A                           |
| 171213_PT_H37Rv_1-4.sqt | 8710    | 2 | True   | 1334.666674 | 1334.669905   | -2.42083 | 2.5707       | 6.67664355801875   | 0.4374  | 14           | 0.48627       | K.RGGDYVSVGPAEK.I                                       |
| 171213_PT_H37Rv_1-4.sqt | 23603   | 3 | True   | 1893.068761 | 1893.069156   | -0.20866 | 2.7493       | 6.46306945772069   | 0.4334  | 20           | 0.4939        | K.VSGTIDAAVIDPIVPLQK.G                                  |
| 171213_PT_H37Rv_1-4.sqt | 23535   | 2 | True   | 1893.064295 | 1893.069156   | -2.56779 | 3.2671       | 9.83957422679248   | 0.525   | 17           | 0.56508       | K.VSGTIDAAVIDPIVPLQK.G                                  |
| 171213_PT_H37Rv_1-4.sqt | 14269   | 2 | True   | 1671.818256 | 1671.81842    | -0.0981  | 3.0646       | 9.62585581593785   | 0.5693  | 17           | 0.79537       | P.GSPSPEAQQLQDSSK.A                                     |
| 171213_PT_H37Rv_1-4.sqt | 13027   | 2 | True   | 1002.544191 | 1002.546602   | -2.40488 | 1.6905       | 0.109814866007207  | 0.2561  | 12           | 0.35807       | R.DAIDGLATVK.V                                          |
| 171213_PT_H37Rv_1-4.sqt | 10611   | 2 | True   | 1178.566698 | 1178.568794   | -1.77843 | 1.4583       | -0.157003748809665 | 0.1533  | 9            | 0.29922       | R.GGDYVSVGPAEK.I                                        |
| 171213_PT_H37Rv_1-4.sqt | 16227   | 2 | True   | 1693.926806 | 1693.934393   | -4.47894 | 3.4524       | 11.7537239515232   | 0.5277  | 17           | 0.5593        | R.GLGAVVGQVQNPTIQGR.D                                   |
| 171213_PT_H37Rv_1-4.sqt | 16305   | 3 | True   | 1693.936341 | 1693.934393   | 1.14998  | 3.2621       | 9.66132599538616   | 0.5395  | 21           | 0.54928       | R.GLGAVVGQVQNPTIQGR.D                                   |
| 171213_PT_H37Rv_1-4.sqt | 28521   | 3 | True   | 2433.346958 | 2433.350022   | -1.25917 | 3.7486       | 8.2023824515762    | 0.4944  | 27           | 0.56355       | R.LPITLWIVDTNASTPAPANLVR.M                              |

Generate Search DB Search (Comet PSM) Filter Project Organization Quant Select Analyze Utils Help

## .: Filter :: Search Engine Processor (SEPro - for PSMs)

File Statistics Tools

Control Follow up Result Browser

Spec FDR: 47 / 35750 = 0.13% Pep FDR: 22 / 17513 = 0.13% Prot FDR: 14 / 1467 = 0.95% # Prot (Max Parsimony): 1454 Unique Prot: 1453 Unlabeled Decoys: 0 / 0

View mode:  Proteins  Proteins Max Pars  Peptides  Scans 

|   | Coverage   | Protein Score | Description |                                                                                                       |
|---|------------|---------------|-------------|-------------------------------------------------------------------------------------------------------|
| 1 | 6801147621 | 0.386         | 12.924      | Putative lipoprotein LppO OS=Mycobacterium tuberculosis (strain ATCC 25618 / H37Rv) GN=lppo PE=1 SV=1 |

|   | File Name               | Scan No | Z | Unique | MeasuredMH  | TheoreticalMH | PPM      | PrimaryScore | SecondaryScore   | DeltaCN | PeaksMatched | BayesianScore | PeptideSequence                        |
|---|-------------------------|---------|---|--------|-------------|---------------|----------|--------------|------------------|---------|--------------|---------------|----------------------------------------|
| 1 | 171213_PT_H37Rv_1-5.sqt | 13877   | 3 | True   | 2610.249681 | 2610.250429   | -0.28656 | 3.1995       | 10.404362845449  | 0.504   | 23           | 0.62307       | K.IGSVDYQM(+15.994900)PYQPVSPTQVEATR.Q |
| 2 | 171213_PT_H37Rv_1-5.sqt | 16352   | 3 | True   | 2594.248692 | 2594.255529   | -2.63545 | 2.0502       | 2.81842325858358 | 0.2536  | 17           | 0.40816       | K.IGSVDYQMPYQPVSPTQVEATR.Q             |
| 3 | 171213_PT_H37Rv_1-5.sqt | 3439    | 2 | True   | 1660.735033 | 1660.739514   | -2.6982  | 1.8711       | 6.2606520369236  | 0.3618  | 10           | 0.45859       | R.TAT(+324.105600)PSESGTQTTR.V         |
| 4 | 171213_PT_H37Rv_1-5.sqt | 3796    | 2 | True   | 1336.631226 | 1336.633914   | -2.01103 | 2.1087       | 7.02428909523809 | 0.5115  | 12           | 0.57607       | R.TATPSESGTQTTR.V                      |
| 5 | 171213_PT_H37Rv_1-5.sqt | 20182   | 3 | True   | 3044.490025 | 3043.485466   | 0.39711  | 3.6945       | 8.62255370707406 | 0.4541  | 29           | 0.58379       | R.VNAHDDSASVTLSLSDSTPPDVNGFGISLKI      |

.: Filter :: Search Engine Processor (SEPro - for PSMs)

Spec FDR: 49 / 36000 = 0.14% Pep FDR: 24 / 17635 = 0.14% Prot FDR: 15 / 1505 = 1% # Prot (Max Parsimony): 1487 Unique Prot: 1482 Unlabeled Decoys: 0 / 0

View mode:  Proteins  Proteins Max Pars  Peptides  Scans

|   | Coverage | Protein Score | Description                                                                                                              |
|---|----------|---------------|--------------------------------------------------------------------------------------------------------------------------|
| 1 | 0.7262   | 290.7926      | Alanine and proline-rich secreted protein Apa OS=Mycobacterium tuberculosis (strain ATCC 25618 / H37Rv) GN=apa PE=1 SV=1 |

|    | File Name               | Scan No | Z | Unique | MeasuredMH  | TheoreticalMH | PPM      | PrimaryScore | SecondaryScore    | DeltaCN | PeaksMatched | BayesianScore | PeptideSequence                                              |
|----|-------------------------|---------|---|--------|-------------|---------------|----------|--------------|-------------------|---------|--------------|---------------|--------------------------------------------------------------|
| 4  | 171213_PT_H37Rv_1-3.sqt | 14912   | 2 | True   | 1589.80266  | 1589.807067   | -2.77204 | 3.2521       | 9.63346041532307  | 0.5696  | 16           | 0.87783       | D.PPFPQGPPPVANDTR.I                                          |
| 5  | 171213_PT_H37Rv_1-3.sqt | 18551   | 3 | True   | 2784.421482 | 2783.422352   | -1.51558 | 3.1142       | 7.05741605353654  | 0.4147  | 28           | 0.88319       | D.PSKPNGQIWTGVIGSPAANAPDAGPPQR.W                             |
| 6  | 171213_PT_H37Rv_1-3.sqt | 20710   | 2 | True   | 2807.54051  | 2807.545427   | -1.75135 | 3.3637       | 13.9582268601659  | 0.6612  | 21           | 0.88537       | K.ALAESIRPLVAPPAPAPAPAEPAPAPAPA.G                            |
| 7  | 171213_PT_H37Rv_1-3.sqt | 20608   | 3 | True   | 2807.539511 | 2807.545427   | -2.10718 | 3.0844       | 6.13302811142977  | 0.4044  | 19           | 0.74689       | K.ALAESIRPLVAPPAPAPAPAEPAPAPAPA.G                            |
| 8  | 171213_PT_H37Rv_1-3.sqt | 18664   | 4 | True   | 4727.432272 | 4726.43487    | -1.25819 | 3.8271       | 6.21460809842219  | 0.2129  | 40           | 0.45812       | K.ALAESIRPLVAPPAPAPAPAEPAPAPAPAGEVAPT(+486.158400)PTTPTPQR.T |
| 9  | 171213_PT_H37Rv_1-2.sqt | 18976   | 4 | True   | 4729.443991 | 4726.43487    | -0.19643 | 2.8751       | 0.632993257740198 | 0.1703  | 34           | 0.44238       | K.ALAESIRPLVAPPAPAPAPAEPAPAPAPAGEVAPT(+486.158400)PTTPTPQR.T |
| 10 | 171213_PT_H37Rv_1-3.sqt | 18680   | 3 | True   | 4729.444676 | 4726.43487    | -0.05159 | 2.9347       | 0.809680996815897 | 0.1332  | 24           | 0.43961       | K.ALAESIRPLVAPPAPAPAPAEPAPAPAPAGEVAPT(+486.158400)PTTPTPQR.T |
| 11 | 171213_PT_H37Rv_1-3.sqt | 18662   | 4 | True   | 4729.442038 | 4726.43487    | -0.60937 | 3.2876       | 3.21637894466961  | 0.2441  | 39           | 0.46967       | K.ALAESIRPLVAPPAPAPAPAEPAPAPAPAGEVAPT(+486.158400)PTTPTPQR.T |
| 12 | 171213_PT_H37Rv_1-2.sqt | 18970   | 3 | True   | 4729.434055 | 4726.43487    | -2.29732 | 2.8923       | 4.45675018086982  | 0.1416  | 27           | 0.43944       | K.ALAESIRPLVAPPAPAPAPAEPAPAPAPAGEVAPT(+486.158400)PTTPTPQR.T |
| 13 | 171213_PT_H37Rv_1-4.sqt | 17848   | 4 | True   | 4727.4186   | 4726.43487    | -4.15026 | 2.5616       | 0.877070018720874 | 0.116   | 38           | 0.41738       | K.ALAESIRPLVAPPAPAPAPAEPAPAPAPAGEVAPT(+486.158400)PTTPTPQR.T |
| 14 | 171213_PT_H37Rv_1-3.sqt | 19135   | 4 | True   | 4242.275046 | 4240.27647    | -1.91501 | 4.3682       | 8.58976388425107  | 0.4678  | 42           | 0.53825       | K.ALAESIRPLVAPPAPAPAPAEPAPAPAPAGEVAPTPTTPTPQR.T              |
| 15 | 171213_PT_H37Rv_1-3.sqt | 19457   | 3 | True   | 4243.27512  | 4240.27647    | -2.6866  | 4.4726       | 13.9399406363425  | 0.4594  | 35           | 0.52648       | K.ALAESIRPLVAPPAPAPAPAEPAPAPAPAGEVAPTPTTPTPQR.T              |
| 16 | 171213_PT_H37Rv_1-2.sqt | 20426   | 3 | True   | 3133.547581 | 3132.549738   | -1.75743 | 4.8469       | 17.0700135604756  | 0.6323  | 34           | 0.75078       | K.FSDPSKPNGQIWTGVIGSPAANAPDAGPPQR.W                          |
| 17 | 171213_PT_H37Rv_1-4.sqt | 19127   | 4 | True   | 3133.548727 | 3132.549738   | -1.39171 | 3.7053       | 7.5752347127935   | 0.4352  | 30           | 0.59224       | K.FSDPSKPNGQIWTGVIGSPAANAPDAGPPQR.W                          |
| 18 | 171213_PT_H37Rv_1-3.sqt | 20066   | 2 | True   | 3133.550585 | 3132.549738   | -0.79877 | 4.7078       | 22.519033327572   | 0.6916  | 27           | 0.77766       | K.FSDPSKPNGQIWTGVIGSPAANAPDAGPPQR.W                          |
| 19 | 171213_PT_H37Rv_1-3.sqt | 20441   | 3 | True   | 3133.533824 | 3132.549738   | -6.14769 | 3.9926       | 11.9498812401698  | 0.5666  | 28           | 0.6711        | K.FSDPSKPNGQIWTGVIGSPAANAPDAGPPQR.W                          |
